# Supplementary material for: Two New Compounds from the Fungus Xylaria nigripes
Source: MDPI journal article supplement (doi:10.3390/molecules28020508), 2023-01-04
Supplement: s1 [file s1]

**Supporting Information for**

## **Two new compounds from the fungus *Xylaria nigripes***

Hong-Ping Long <sup>1</sup>, Siqian Zhou<sup>1</sup>, Lan-Qing Li <sup>3</sup>, Jing Li <sup>2,4\*</sup>, Ji-Kai Liu <sup>3\*</sup>

<sup>1</sup> The First Hospital of Hunan University of Chinese Medicine, Changsha, Hunan 410007, China

<sup>2</sup> Department of Pharmacy, Xiangya Hospital, Central South University, Changsha, Hunan 410008,

China

<sup>3</sup> School of Pharmaceutical Sciences, South-Central Minzu University, Wuhan, Hubei 430074,

China

<sup>4</sup> National Clinical Research Center for Geriatric Disorders, Xiangya Hospital, Central South University,

Changsha, Hunan 410008, China

\*Corresponding authors: lijingliyun@csu.edu.cn (J.L.), liujikai@mail.scuec.edu.cn (J.-K.L.)

## Contents

|                                                                                                                                                                                                                                                                                                                                                                                              |     |
|----------------------------------------------------------------------------------------------------------------------------------------------------------------------------------------------------------------------------------------------------------------------------------------------------------------------------------------------------------------------------------------------|-----|
| Table S1. Cell viability of normal PC12 cells with different concentrations of compounds <b>1</b> and <b>2</b> .....                                                                                                                                                                                                                                                                         | 3   |
| Figure S1. Cell viability of normal PC12 cells with different concentrations of compounds <b>1</b> and <b>2</b> .....                                                                                                                                                                                                                                                                        | 3   |
| Table S2. Cell viability of PC12 cells evaluated by the CCK8 test (** $p < 0.01$ compared with control group, <sup>##</sup> $p < 0.01$ compared with model group).....                                                                                                                                                                                                                       | 4   |
| Table S3. Cell viability of the tested compounds <b>1</b> and <b>2</b> compared with DMSO group (* $p < 0.05$ , ** $p < 0.01$ ).....                                                                                                                                                                                                                                                         | 4   |
| Figure S2. The cell viability of DMSO group with different concentrations of compounds <b>1</b> and <b>2</b> .....                                                                                                                                                                                                                                                                           | 4   |
| Table S4. The neuronal apoptosis rate was presented as the percentage of Annexin FITC/PI-positive neurons. The percentage of Annexin FITC/PI-positive neurons was calculated by dividing the number of Annexin FITC/PI-positive neurons with the total number of neurons. Data are presented as the mean±SD. ** $P < 0.01$ vs. Control group; <sup>##</sup> $P < 0.01$ vs. Model group. .... | 5   |
| Figure S3. The apoptosis rate of PC12 cells with different groups. ....                                                                                                                                                                                                                                                                                                                      | 5   |
| Figure S4. <sup>1</sup> H NMR spectrum of <b>1</b> (600 MHz, Methanol- $d_4$ ) .....                                                                                                                                                                                                                                                                                                         | 6   |
| Figure S5. <sup>13</sup> C NMR and DEPT spectrum of <b>1</b> (150 MHz, Methanol- $d_4$ ).....                                                                                                                                                                                                                                                                                                | 6   |
| Figure S6. <sup>1</sup> H- <sup>1</sup> H COSY spectrum of <b>1</b> .....                                                                                                                                                                                                                                                                                                                    | 7   |
| Figure S7. HSQC spectrum of <b>1</b> .....                                                                                                                                                                                                                                                                                                                                                   | 7   |
| Figure S8. HMBC spectrum of <b>1</b> .....                                                                                                                                                                                                                                                                                                                                                   | 8   |
| Figure S9. NOESY spectrum of <b>1</b> .....                                                                                                                                                                                                                                                                                                                                                  | 8   |
| Figure S10. HR-ESI-MS spectrum of <b>1</b> .....                                                                                                                                                                                                                                                                                                                                             | 9   |
| Figure S11. IR spectra of <b>1</b> (in MeOH) .....                                                                                                                                                                                                                                                                                                                                           | 10  |
| Figure S12. <sup>1</sup> H NMR spectrum of <b>2</b> (600 MHz, Methanol- $d_4$ ) .....                                                                                                                                                                                                                                                                                                        | 10  |
| Figure S13. <sup>13</sup> C NMR and DEPT spectrum of <b>2</b> (150 MHz, Methanol- $d_4$ ).....                                                                                                                                                                                                                                                                                               | 11  |
| Figure S14. <sup>1</sup> H- <sup>1</sup> H COSY spectrum of <b>2</b> .....                                                                                                                                                                                                                                                                                                                   | 11  |
| Figure S15. HSQC spectrum of <b>2</b> .....                                                                                                                                                                                                                                                                                                                                                  | 12  |
| Figure S16. HMBC spectrum of <b>2</b> .....                                                                                                                                                                                                                                                                                                                                                  | 12  |
| Figure S17. NOESY spectrum of <b>2</b> .....                                                                                                                                                                                                                                                                                                                                                 | 13  |
| Figure S18. HR-ESI-MS spectrum of <b>2</b> .....                                                                                                                                                                                                                                                                                                                                             | 13  |
| Figure S19. IR spectra of <b>2</b> (in MeOH) .....                                                                                                                                                                                                                                                                                                                                           | 14  |
| Table S5. Geometry data of conformers of structure <b>1a</b> .....                                                                                                                                                                                                                                                                                                                           | 14  |
| Table S6. Geometry data of conformers of structure <b>1b</b> .....                                                                                                                                                                                                                                                                                                                           | 115 |

## 1. Cytotoxicity assay

The cytotoxicity experiments were grouped as follows: normal group, 0.1  $\mu\text{mol}\cdot\text{L}^{-1}$  Nimodipine group), compound **1** group (0.01, 0.1, 1 and 10  $\mu\text{mol}\cdot\text{L}^{-1}$ ), compound **2** group (0.01, 0.1, 1 and 10  $\mu\text{mol}\cdot\text{L}^{-1}$ ). Cells were digested with  $1\times 10^4$  cells per well and 100  $\mu\text{L}$  per well. After application, culture media and different concentrations of drug solution were added, and the media was discarded for 24 h, and each group was respectively Medium with 10% CCK8 reagent was added to continue the light-evasive incubation for 3 h, and the absorbance values were measured at 450 nm.

**Table S1.** Cell viability of normal PC12 cells with different concentrations of compounds **1** and **2**.

| Compounds         | Drug concentration ( $\mu\text{M}$ ) | Mean $\pm$ SD     |
|-------------------|--------------------------------------|-------------------|
| Control           | -                                    | 100.00 $\pm$ 2.21 |
| Nimodipine        | 10.00                                | 99.13 $\pm$ 1.11  |
|                   | 10.00                                | 95.15 $\pm$ 4.84  |
| Compound <b>1</b> | 1.00                                 | 108.12 $\pm$ 6.17 |
|                   | 0.10                                 | 95.15 $\pm$ 4.84  |
|                   | 0.01                                 | 111.42 $\pm$ 3.28 |
|                   | 10.00                                | 107.51 $\pm$ 1.57 |
| Compound <b>2</b> | 1.00                                 | 104.97 $\pm$ 1.40 |
|                   | 0.10                                 | 105.36 $\pm$ 0.92 |
|                   | 0.01                                 | 102.28 $\pm$ 7.52 |

**Figure S1.** Cell viability of normal PC12 cells with different concentrations of compounds **1** and **2**.

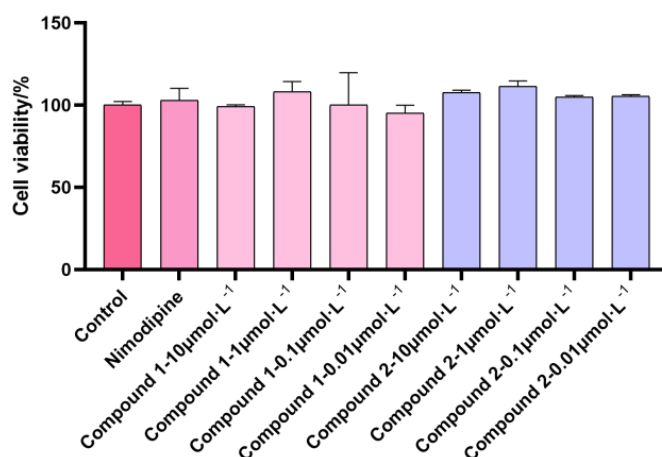

**Table S2.** Cell viability of PC12 cells evaluated by the CCK8 test (\*\*  $p < 0.01$  compared with control group, <sup>##</sup>  $p < 0.01$  compared with model group)

| Compounds  | Drug concentration ( $\mu\text{M}$ ) | Mean $\pm$ SD                  |
|------------|--------------------------------------|--------------------------------|
| Control    | -                                    | 100.00 $\pm$ 0.53              |
| Model      | -                                    | 46.75 $\pm$ 1.98**             |
| DMSO       | -                                    | 58.95 $\pm$ 3.33**             |
| Nimodipine | 10.00                                | 80.06 $\pm$ 1.70 <sup>##</sup> |
|            | 10.00                                | 65.06 $\pm$ 2.88 <sup>##</sup> |
| Compound 1 | 1.00                                 | 72.52 $\pm$ 4.32 <sup>##</sup> |
|            | 0.10                                 | 64.67 $\pm$ 3.48 <sup>##</sup> |
|            | 0.01                                 | 61.72 $\pm$ 2.63 <sup>##</sup> |
|            | 10.00                                | 67.20 $\pm$ 3.59 <sup>##</sup> |
| Compound 2 | 1.00                                 | 79.72 $\pm$ 1.24 <sup>##</sup> |
|            | 0.10                                 | 73.11 $\pm$ 0.67 <sup>##</sup> |
|            | 0.01                                 | 64.19 $\pm$ 5.73 <sup>##</sup> |

**Table S3.** Cell viability of the tested compounds 1 and 2 compared with DMSO group (\* $p < 0.05$ , \*\*  $p < 0.01$ )

| Compounds  | Drug concentration ( $\mu\text{M}$ ) | Mean $\pm$ SD      |
|------------|--------------------------------------|--------------------|
| DMSO       | -                                    | 58.95 $\pm$ 3.33   |
|            | 10.00                                | 65.07 $\pm$ 2.88*  |
| Compound 1 | 10.00                                | 72.53 $\pm$ 4.32** |
|            | 1.00                                 | 64.67 $\pm$ 3.48   |
|            | 0.10                                 | 61.72 $\pm$ 2.63   |
|            | 0.01                                 | 67.20 $\pm$ 3.59** |
| Compound 2 | 10.00                                | 79.72 $\pm$ 1.24** |
|            | 1.00                                 | 73.11 $\pm$ 0.67** |
|            | 0.10                                 | 64.20 $\pm$ 5.73   |

**Figure S2.** The cell viability of DMSO group with different concentrations of compounds 1 and 2.

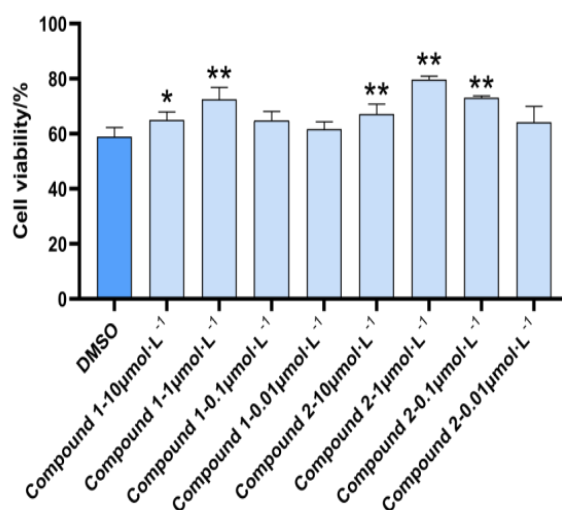

**Table S4.** The neuronal apoptosis rate was presented as the percentage of Annexin FITC/PI-positive neurons. The percentage of Annexin FITC/PI-positive neurons was calculated by dividing the number of Annexin FITC/PI-positive neurons with the total number of neurons. Data are presented as the mean  $\pm$  SD.  $**P < 0.01$  vs. Control group;  $##P < 0.01$  vs. Model group.

| Compounds  | Drug concentration ( $\mu$ M) | Mean $\pm$ SD         |
|------------|-------------------------------|-----------------------|
| Control    | -                             | $3.15 \pm 1.62$       |
| Model      | -                             | $17.43 \pm 2.43^{**}$ |
| DMSO       | -                             | $8.09 \pm 3.32^{**}$  |
| Nimodipine | 10.00                         | $7.04 \pm 0.73^{##}$  |
| Compound 1 | 1.00                          | $10.00 \pm 1.83^{##}$ |
| Compound 2 | 1.00                          | $3.95 \pm 1.95^{##}$  |

**Figure S3.** The apoptosis rate of PC12 cells with different groups..

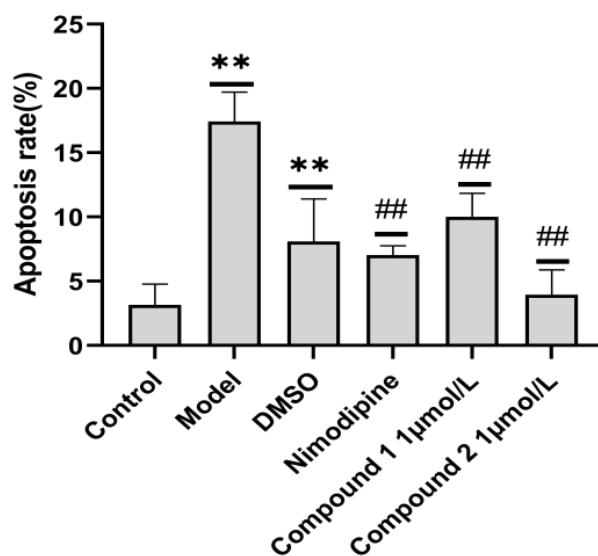

**Figure S4.**  $^1\text{H}$  NMR spectrum of **1** (600 MHz, Methanol- $d_4$ )

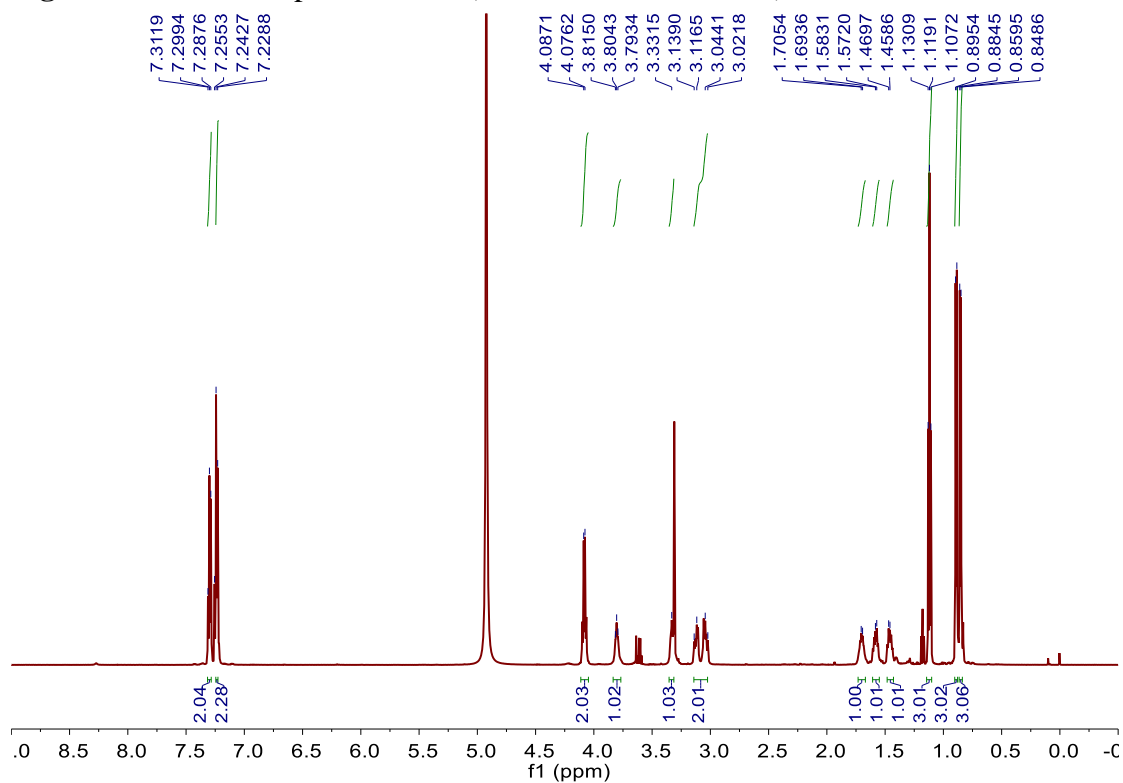

**Figure S5.**  $^{13}\text{C}$  NMR and DEPT spectrum of **1** (150 MHz, Methanol- $d_4$ )

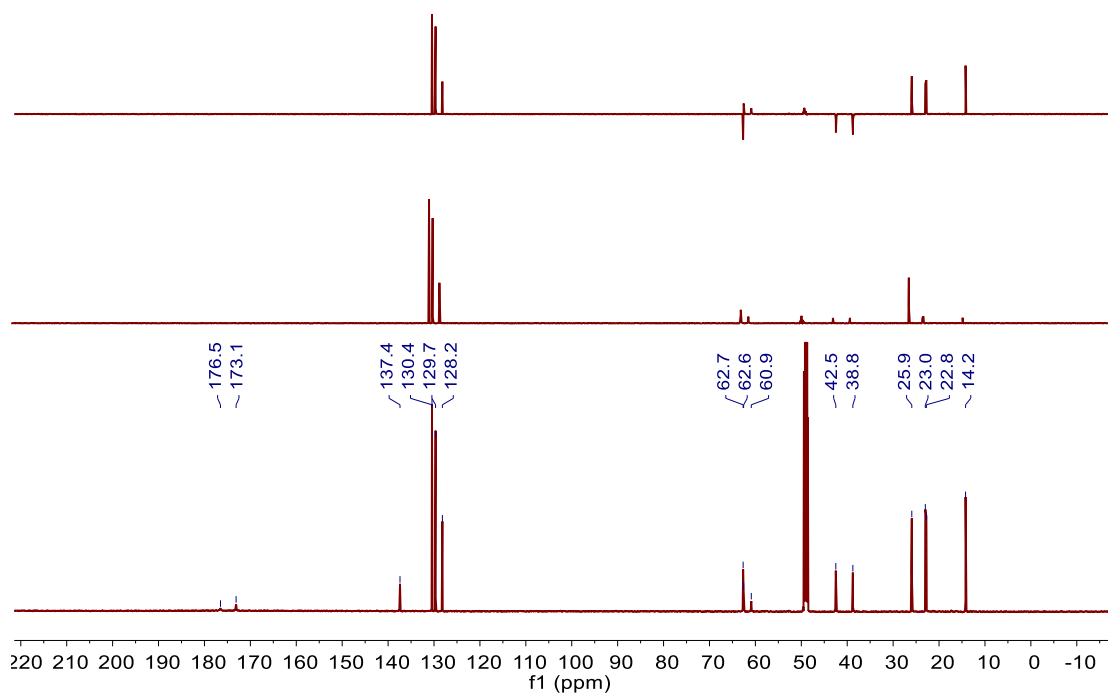

**Figure S6.**  $^1\text{H}$ - $^1\text{H}$  COSY spectrum of **1**

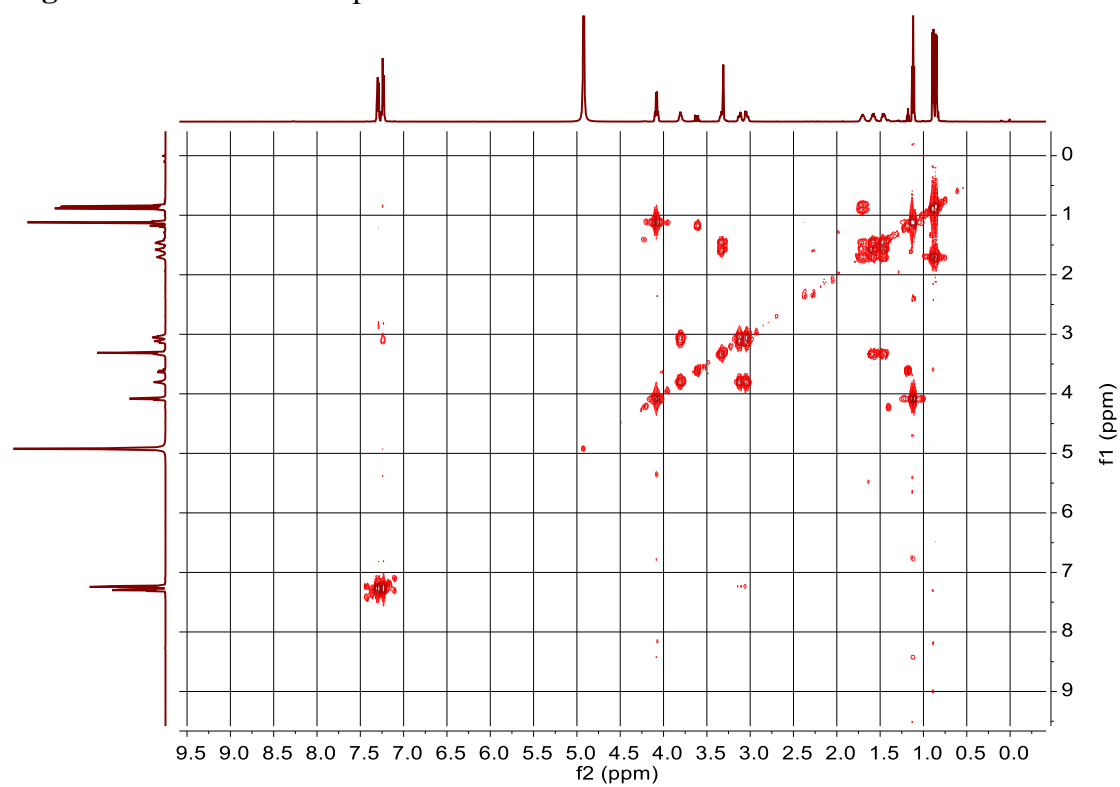

**Figure S7.** HSQC spectrum of **1**

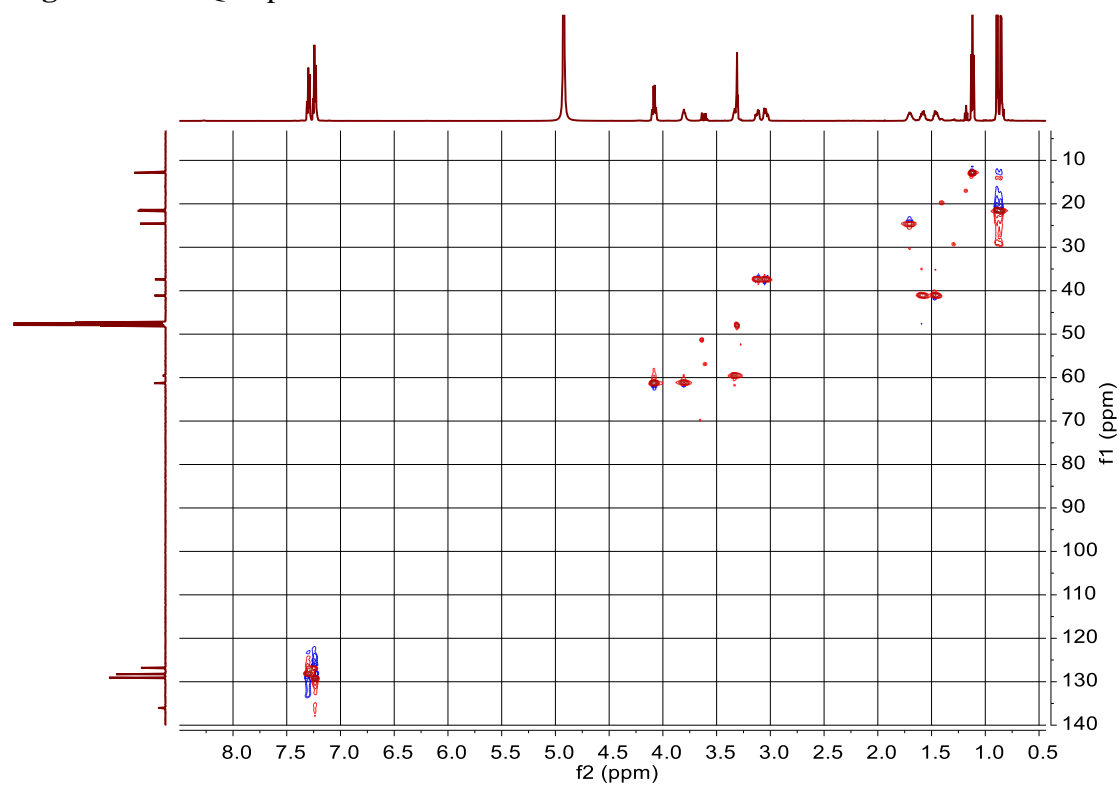

**Figure S8.** HMBC spectrum of **1**

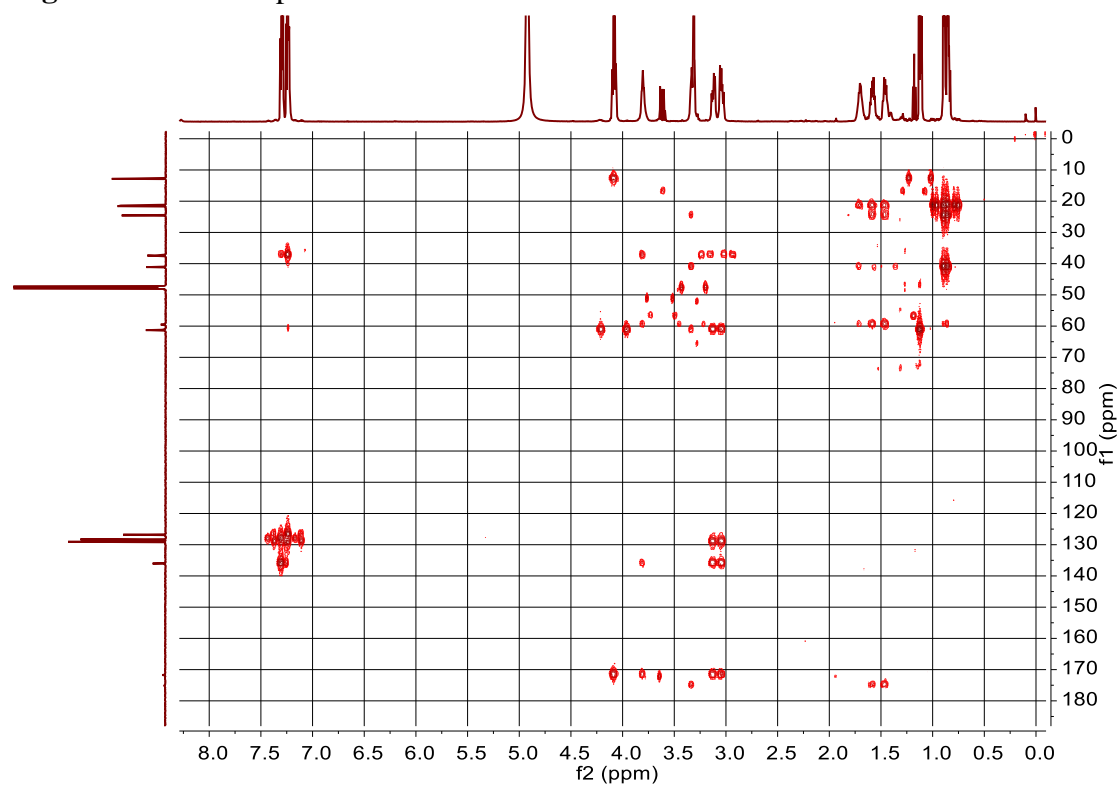

**Figure S9.** NOESY spectrum of **1**

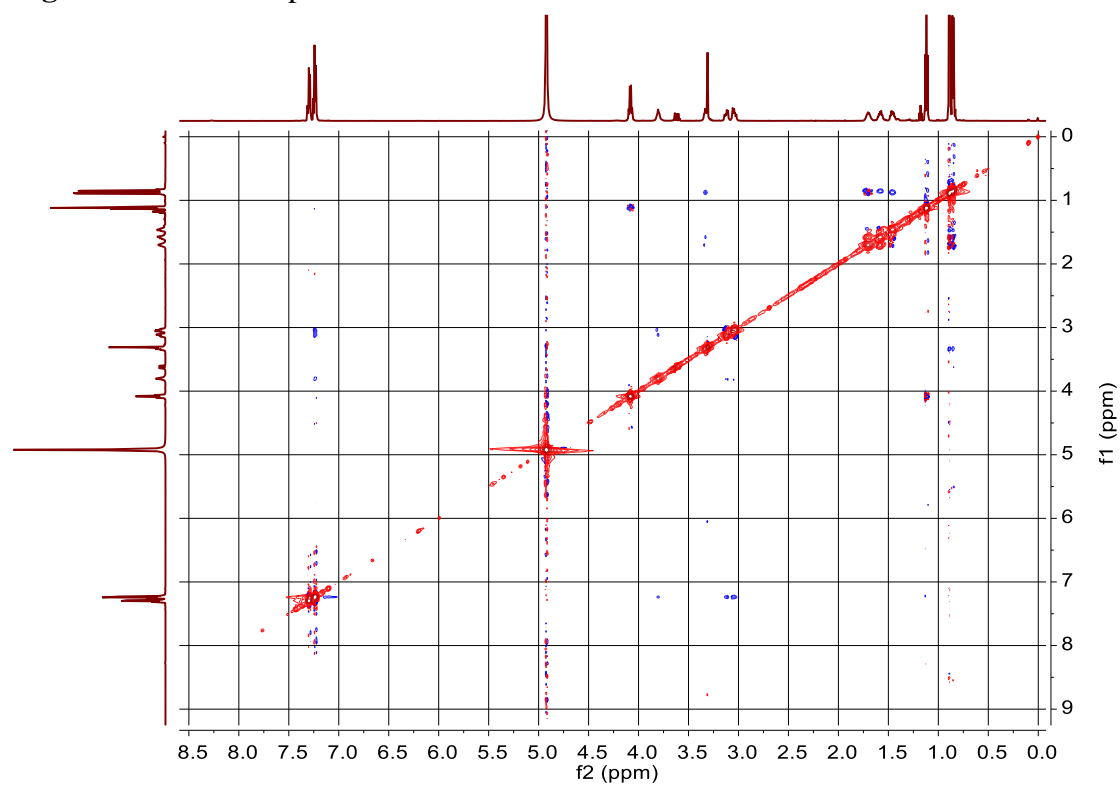



**Figure S10.** HR-ESI-MS spectrum of **1**

T: FTMS + p ESI Full ms [100.0000-1200.0000]

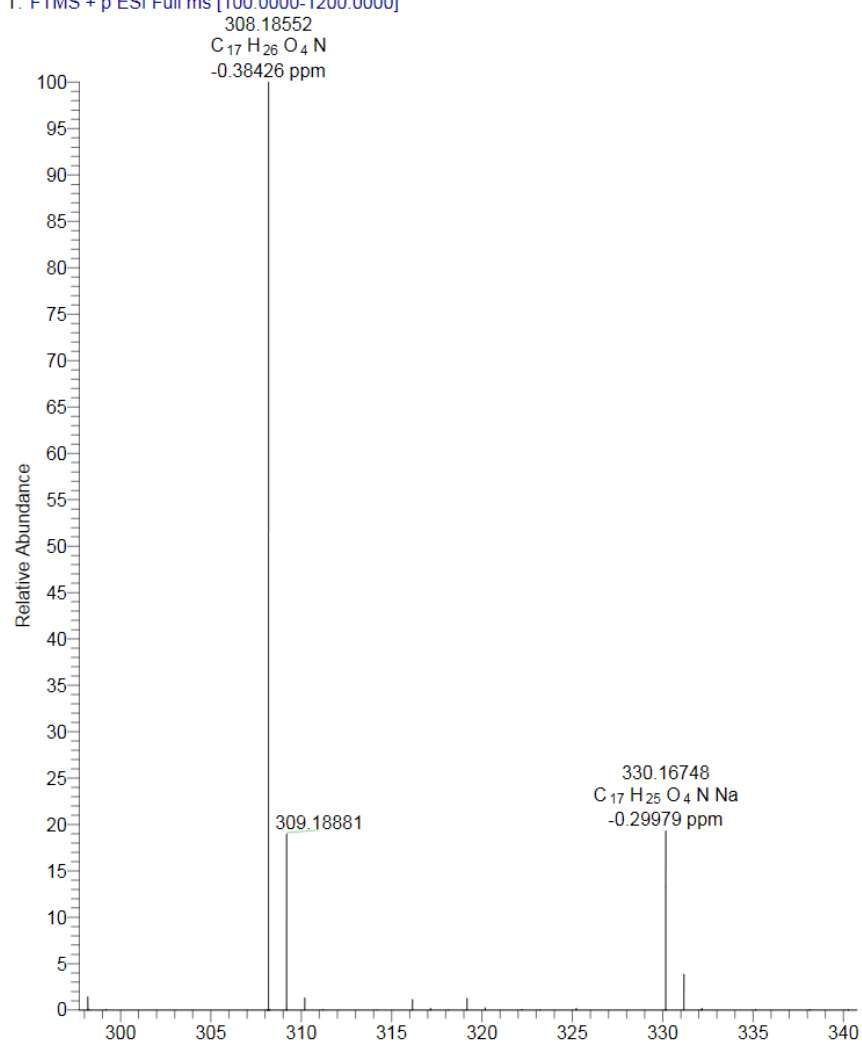

**Figure S11.** IR spectra of **1** (in MeOH)

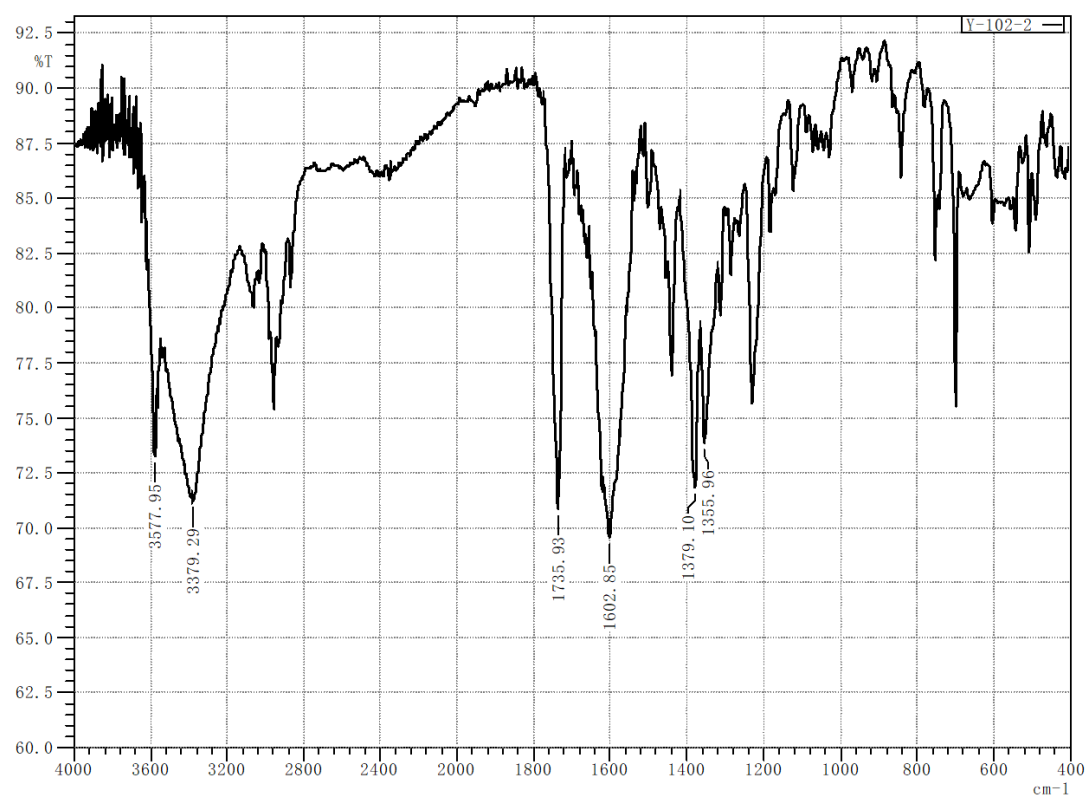

**Figure S12.** <sup>1</sup>H NMR spectrum of **2** (600 MHz, Methanol-*d*<sub>4</sub>)

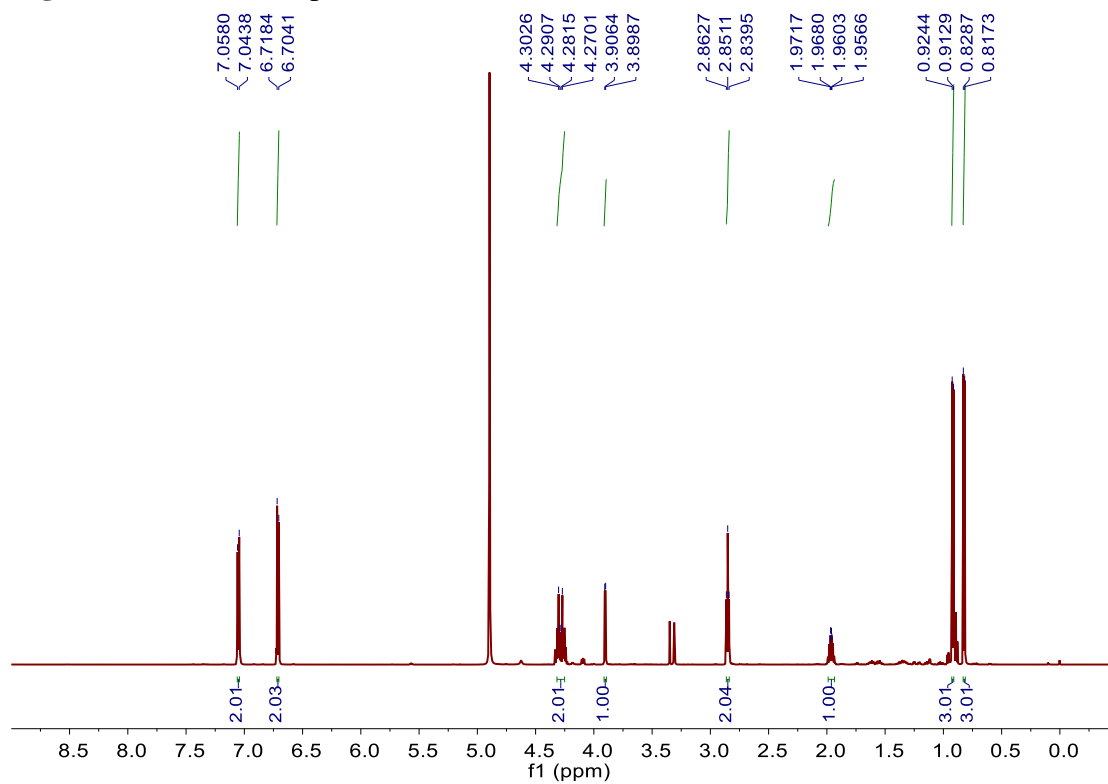

**Figure S13.**  $^{13}\text{C}$  NMR and DEPT spectrum of **2** (150 MHz, Methanol- $d_4$ )

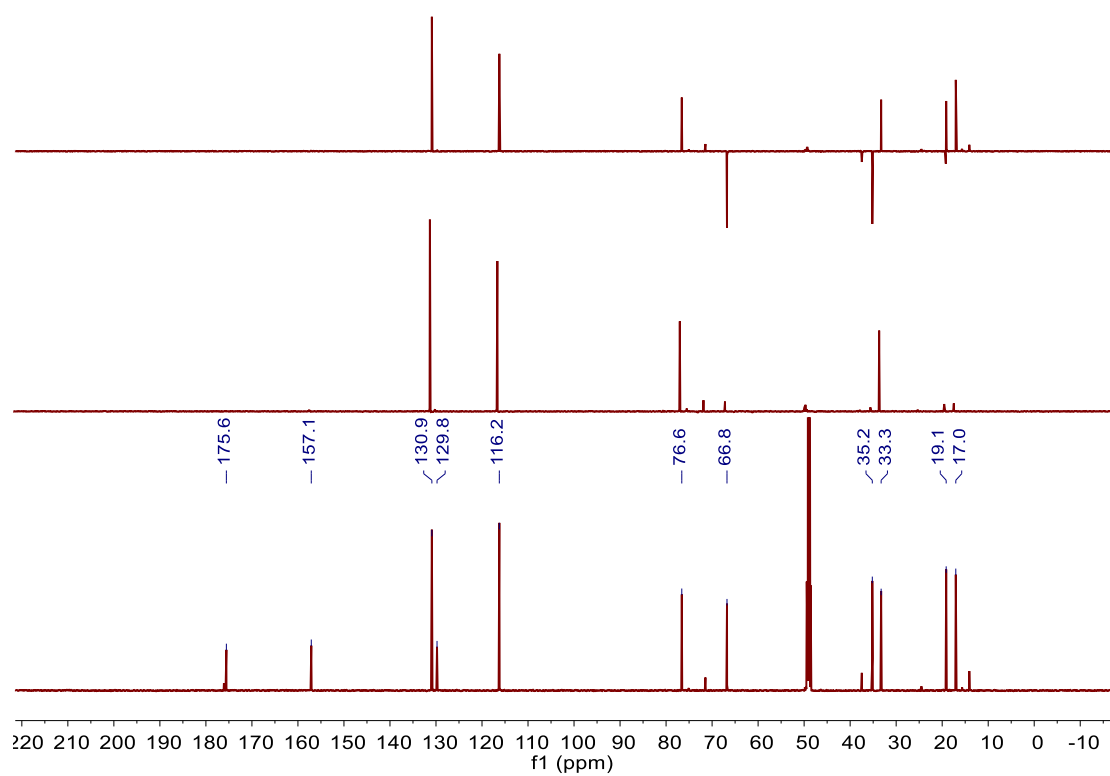

**Figure S14.**  $^1\text{H}$ - $^1\text{H}$  COSY spectrum of **2**

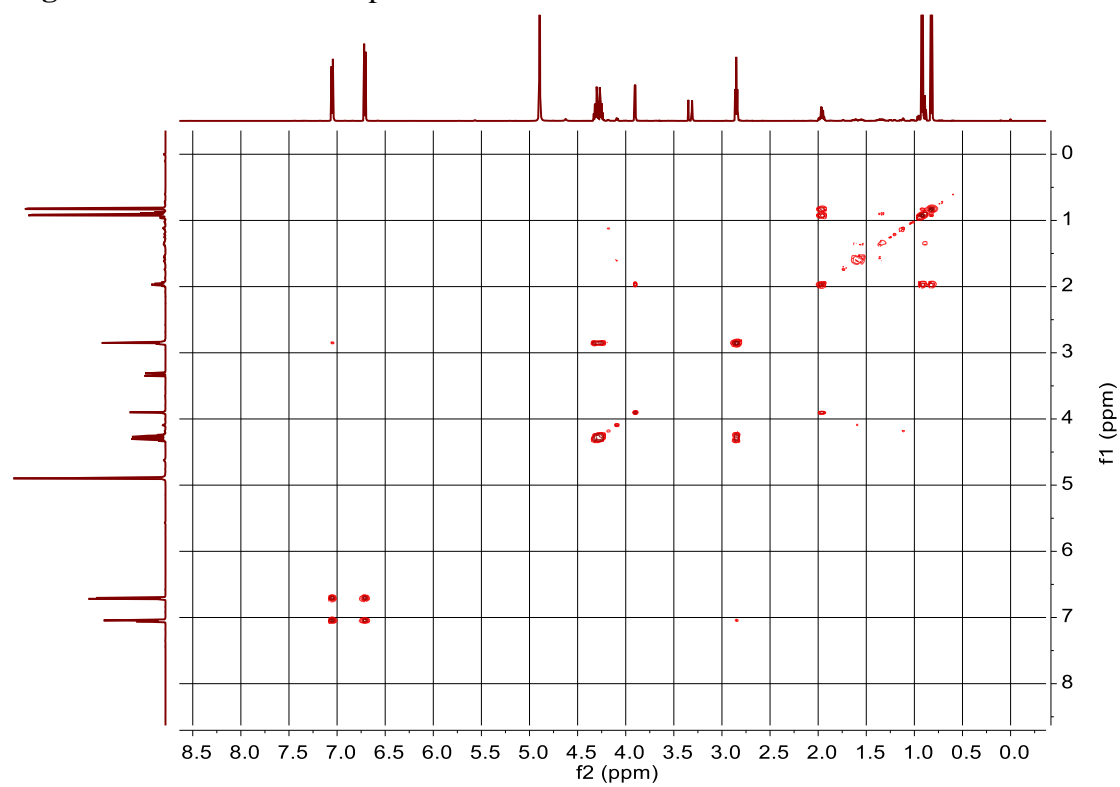

**Figure S15.** HSQC spectrum of **2**

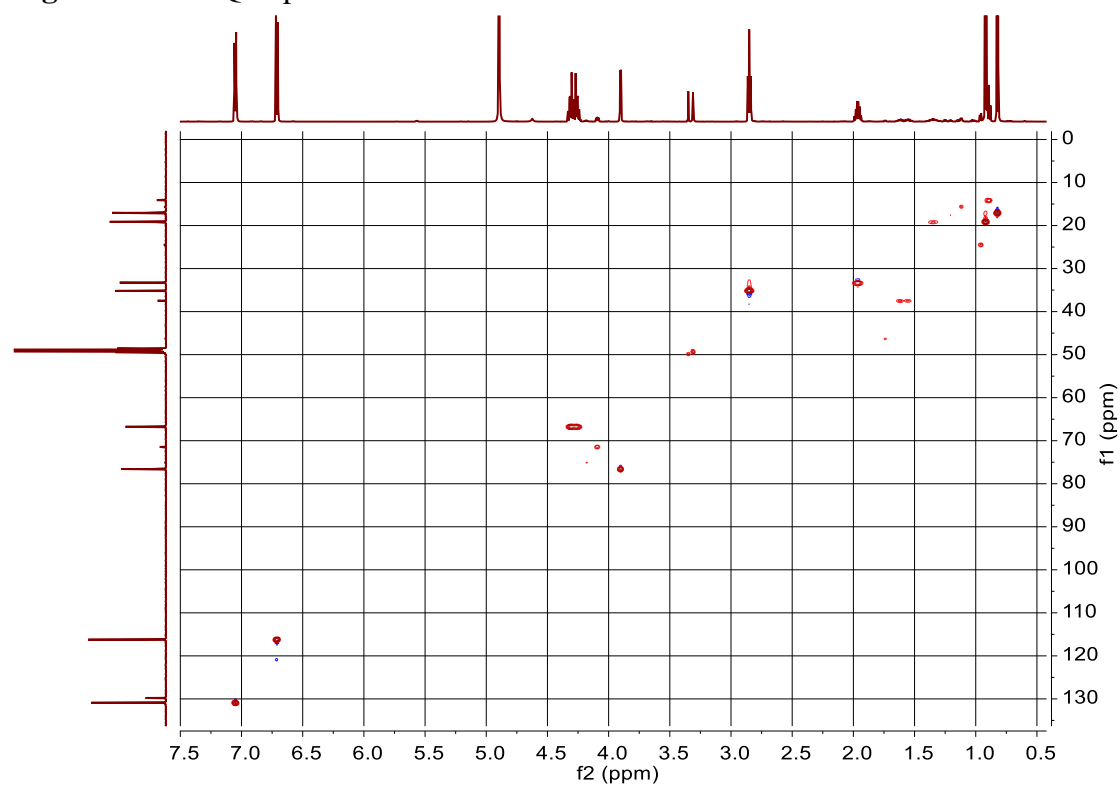

**Figure S16.** HMBC spectrum of **2**

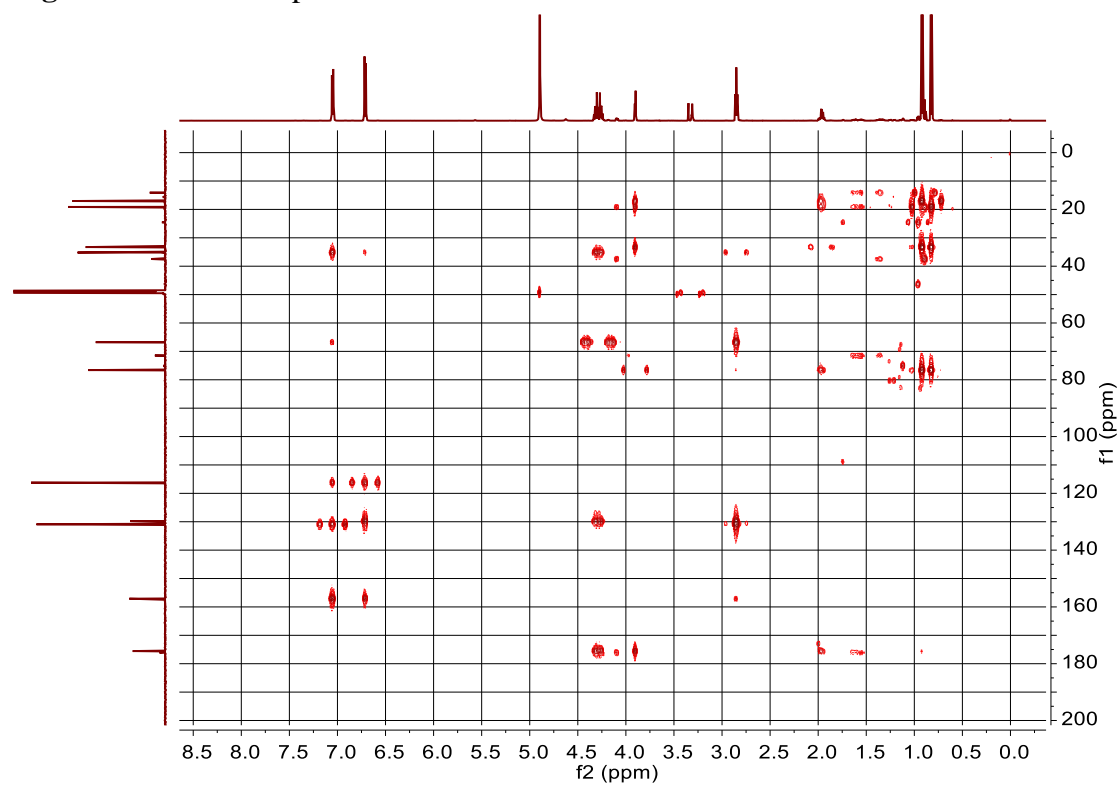

**Figure S17.** NOESY spectrum of **2**

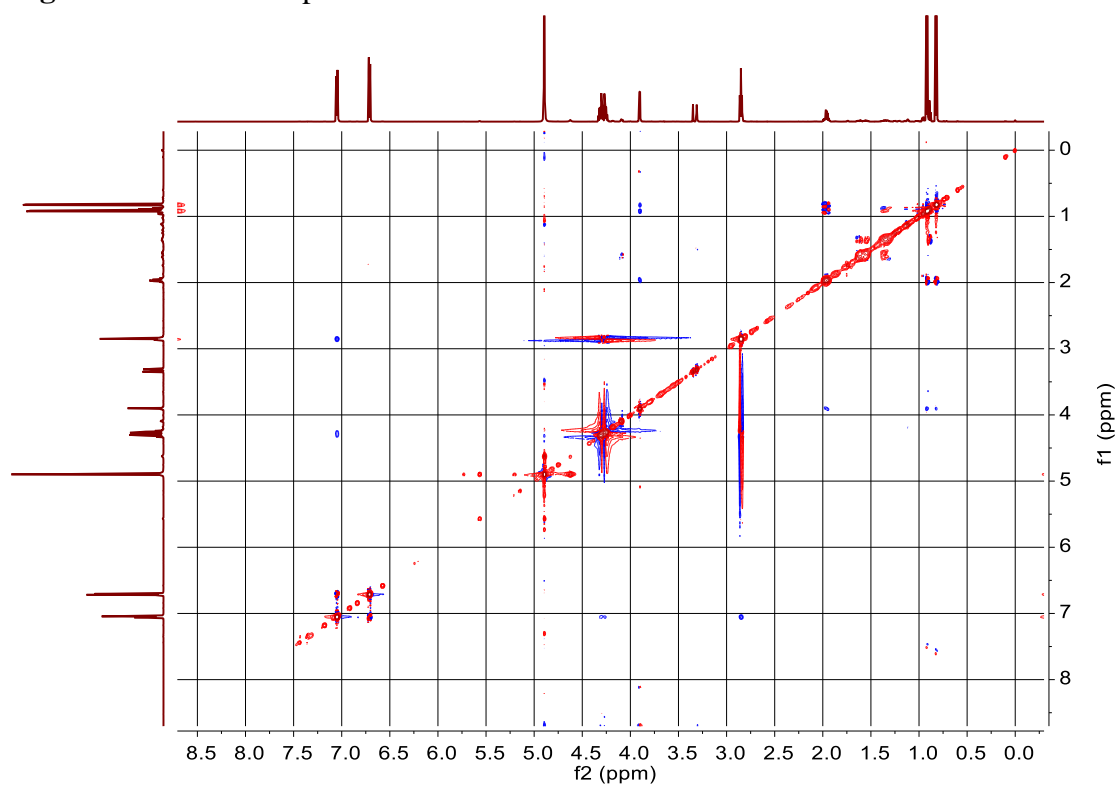

**Figure S18.** HR-ESI-MS spectrum of **2**

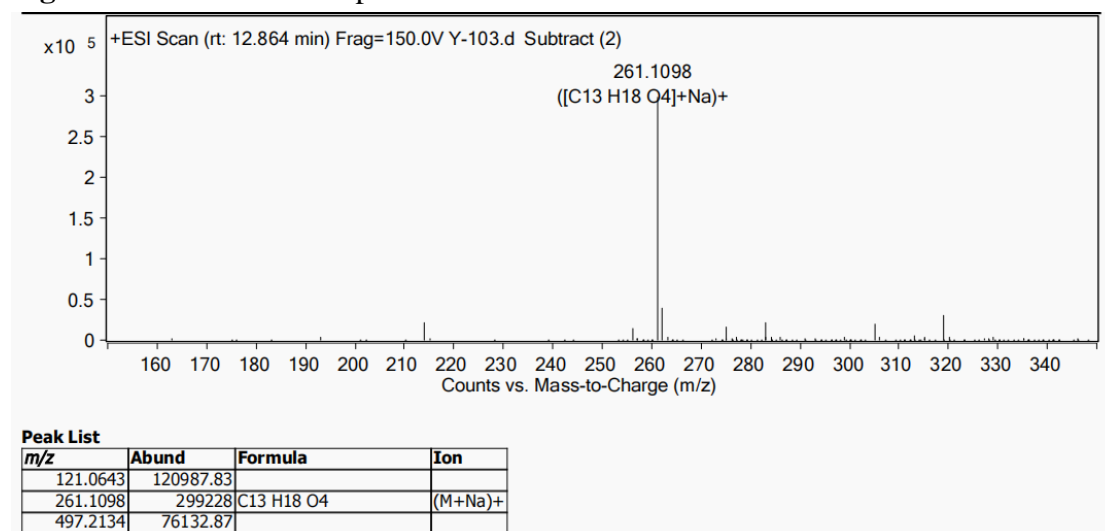

**Figure S19.** IR spectra of **2** (in MeOH)

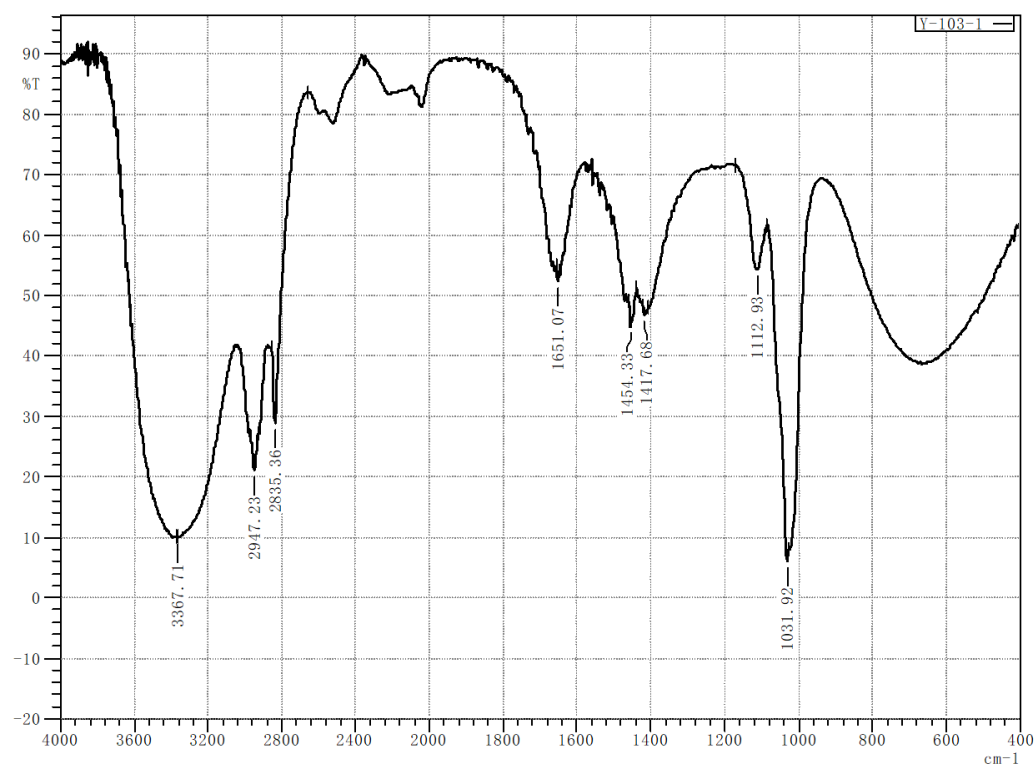

**Table S5.** Geometry data of conformers of structure **1a**

1a-C25,  $\Delta G = 0.0000$  kcal/mol, population = 37.75 %

C 14.877511 -3.017902 9.406069  
C 13.859154 -3.239045 8.486134  
C 12.729381 -3.964350 8.856815  
C 12.599865 -4.469487 10.151179  
C 13.635720 -4.252332 11.063295  
C 14.765846 -3.533675 10.695249  
C 11.337054 -5.164178 10.590216  
C 10.442926 -4.228091 11.437686  
C 9.257386 -5.039893 11.952855  
O 9.600563 -5.752149 13.027082  
O 8.162292 -5.065348 11.437244  
C 8.593763 -6.644502 13.585475  
C 9.219144 -7.355506 14.761014  
C 12.093497 -0.874423 11.172325  
C 12.399552 -0.916688 12.670086  
C 12.894741 0.233881 10.486436  
C 10.598130 -0.686953 10.886262  
C 9.702397 -1.844136 11.351026  
N 9.985027 -3.097779 10.646838  
C 8.225042 -1.458156 11.170379  
O 7.740595 -0.447291 11.630156

O 7.505788 -2.325932 10.462384  
H 15.753892 -2.449677 9.121817  
H 13.939982 -2.846485 7.480405  
H 11.940895 -4.136625 8.133125  
H 13.549094 -4.639293 12.071875  
H 15.557654 -3.369663 11.415230  
H 10.765467 -5.501896 9.723627  
H 11.574697 -6.040497 11.193306  
H 11.021099 -3.906726 12.309413  
H 7.732495 -6.044463 13.879301  
H 8.281186 -7.338526 12.805199  
H 9.535340 -6.644366 15.525183  
H 8.486823 -8.032119 15.204483  
H 10.083135 -7.943141 14.448023  
H 12.413531 -1.822643 10.737557  
H 12.087551 0.012235 13.155973  
H 11.895782 -1.743137 13.174649  
H 13.471253 -1.041566 12.836287  
H 12.618431 1.217071 10.878423  
H 12.717701 0.238472 9.408658  
H 13.965113 0.094143 10.649854  
H 10.244369 0.230032 11.361457  
H 10.450524 -0.558451 9.808399  
H 9.832104 -1.992610 12.426250  
H 8.120791 -3.078986 10.264125  
H 10.607359 -2.933330 9.867289

1a-C82,  $\Delta G = 0.3527$  kcal/mol, population = 20.80 %

C 14.014037 -2.922826 7.953976  
C 14.257989 -3.252905 9.285289  
C 13.354111 -4.041798 9.985024  
C 12.193154 -4.514804 9.368430  
C 11.965657 -4.192002 8.030109  
C 12.868185 -3.397910 7.326628  
C 11.177721 -5.296075 10.161238  
C 10.377048 -4.380492 11.116590  
C 9.467206 -5.264275 11.966051  
O 10.138179 -5.783014 12.996920  
O 8.306126 -5.496005 11.713802  
C 9.425753 -6.699655 13.879332  
C 8.649446 -5.943580 14.936850  
C 11.377725 -0.885338 10.000420  
C 12.119066 -0.724742 11.327949  
C 11.749297 0.238899 9.031397

C 9.855043 -0.929551 10.181274  
C 9.333730 -2.114639 11.007079  
N 9.596468 -3.407231 10.369405  
C 7.826088 -1.939008 11.250267  
O 7.347265 -0.955273 11.770820  
O 7.072091 -2.955130 10.836853  
H 14.714381 -2.301297 7.410856  
H 15.150267 -2.889425 9.779168  
H 13.544437 -4.285074 11.023819  
H 11.075809 -4.562099 7.534045  
H 12.672869 -3.150241 6.290943  
H 10.477622 -5.800612 9.492577  
H 11.670946 -6.060444 10.762119  
H 11.086424 -3.895305 11.793664  
H 8.776319 -7.329279 13.273658  
H 10.213580 -7.308385 14.316594  
H 7.864987 -5.334312 14.488297  
H 8.182066 -6.656372 15.619010  
H 9.311480 -5.298952 15.516558  
H 11.701522 -1.824040 9.547931  
H 11.814073 0.194619 11.836011  
H 11.937160 -1.558933 12.007583  
H 13.196209 -0.676915 11.158188  
H 12.826560 0.255971 8.854830  
H 11.457195 1.213487 9.433045  
H 11.252500 0.108911 8.067346  
H 9.515396 -0.009083 10.660143  
H 9.375934 -0.965993 9.197002  
H 9.793974 -2.092839 11.998456  
H 7.707873 -3.645492 10.515736  
H 9.981001 -3.276642 9.443834

1a-C5,  $\Delta G = 0.5221$  kcal/mol, population = 15.62 %

C 14.825601 -3.094033 9.334830  
C 14.758712 -3.535254 10.654464  
C 13.640848 -4.227249 11.102556  
C 12.572374 -4.490737 10.241968  
C 12.656737 -4.060338 8.917180  
C 13.774472 -3.362560 8.465787  
C 11.324880 -5.155034 10.763599  
C 10.469987 -4.172851 11.599679  
C 9.301756 -4.954326 12.194499  
O 9.685480 -5.611080 13.292225  
O 8.190675 -5.000511 11.716702



C 8.725536 -6.513815 13.915459  
C 8.735882 -7.868035 13.238158  
C 12.128751 -0.830688 11.051770  
C 12.526525 -0.842594 12.527996  
C 12.877895 0.269037 10.296641  
C 10.617980 -0.656184 10.852740  
C 9.752603 -1.785634 11.429704  
N 9.990611 -3.075147 10.775521  
C 8.268598 -1.400685 11.315812  
O 7.812176 -0.371764 11.763966  
O 7.510374 -2.289438 10.677648  
H 15.692516 -2.546565 8.987724  
H 15.575778 -3.333654 11.335576  
H 13.590134 -4.556786 12.133706  
H 11.842676 -4.270331 8.232951  
H 13.820215 -3.028159 7.437095  
H 10.717888 -5.530686 9.937625  
H 11.581738 -6.002652 11.398981  
H 11.083433 -3.817662 12.433122  
H 9.058310 -6.578067 14.948608  
H 7.741304 -6.050306 13.880616  
H 8.062624 -8.542957 13.770031  
H 8.398292 -7.793883 12.204327  
H 9.737195 -8.300442 13.253655  
H 12.428365 -1.785256 10.616372  
H 13.608598 -0.944426 12.629481  
H 12.225407 0.086651 13.020265  
H 12.072571 -1.671674 13.073438  
H 12.626667 0.258869 9.233691  
H 13.957366 0.133804 10.388063  
H 12.626044 1.256610 10.693958  
H 10.293844 0.283244 11.304887  
H 10.402481 -0.578582 9.781662  
H 9.947347 -1.876560 12.501544  
H 8.111215 -3.052725 10.475150  
H 10.580981 -2.957066 9.963313

1a-C41,  $\Delta G = 1.1734$  kcal/mol, population = 5.20 %

C 14.904537 -3.085580 9.530146  
C 14.745785 -3.513140 10.846721  
C 13.621257 -4.241232 11.213451  
C 12.635365 -4.553584 10.273110  
C 12.808469 -4.128736 8.955536  
C 13.935630 -3.398978 8.584380

C 11.372542 -5.262217 10.695692  
C 10.493111 -4.345862 11.575458  
C 9.224927 -5.089527 11.984777  
O 9.496738 -6.009303 12.913360  
O 8.124715 -4.890191 11.522173  
C 8.393391 -6.843260 13.368729  
C 8.938382 -7.787973 14.412408  
C 11.962213 -0.697989 10.744501  
C 13.138023 0.168959 11.199812  
C 11.191164 -0.017076 9.612098  
C 11.084681 -1.046670 11.955846  
C 9.872915 -1.951432 11.683735  
N 10.144783 -3.131393 10.857309  
C 8.657255 -1.208368 11.107189  
O 7.963039 -1.926272 10.222569  
O 8.311476 -0.101878 11.453375  
H 15.777674 -2.512120 9.246393  
H 15.497788 -3.274654 11.588246  
H 13.502964 -4.563816 12.241340  
H 12.052450 -4.364407 8.215771  
H 14.050480 -3.072116 7.558660  
H 10.801614 -5.565824 9.816260  
H 11.604117 -6.160053 11.268538  
H 11.051325 -4.128832 12.492632  
H 7.616446 -6.192530 13.770020  
H 7.987990 -7.374150 12.507144  
H 9.344410 -7.238968 15.262969  
H 8.133514 -8.431028 14.772259  
H 9.722599 -8.421205 13.995576  
H 12.392614 -1.624099 10.353437  
H 13.812903 0.374361 10.366470  
H 12.785975 1.126623 11.593495  
H 13.713127 -0.329139 11.983255  
H 10.722763 0.907100 9.958124  
H 10.405016 -0.653446 9.200248  
H 11.866058 0.230517 8.790325  
H 11.711039 -1.546217 12.699028  
H 10.716191 -0.129217 12.420346  
H 9.507531 -2.305884 12.652654  
H 8.466978 -2.780714 10.146435  
H 10.861479 -2.921729 10.174149

1a-C1,  $\Delta G = 1.7382$  kcal/mol, population = 2.00 %

C 14.845109 -2.827374 9.044022

C 13.769581 -3.230450 8.261037  
C 12.786235 -4.057447 8.798645  
C 12.860951 -4.484794 10.125168  
C 13.953170 -4.083436 10.898759  
C 14.937898 -3.262715 10.364030  
C 11.745915 -5.287046 10.744532  
C 10.843523 -4.392720 11.626280  
C 9.855991 -5.288502 12.368502  
O 8.733295 -5.500299 11.679171  
O 10.105447 -5.782938 13.445743  
C 7.702609 -6.330560 12.290411  
C 6.826915 -5.509204 13.213309  
C 12.020762 -0.874733 10.999854  
C 12.498050 -0.831860 12.451823  
C 12.583048 0.308094 10.208765  
C 10.490609 -0.891051 10.887547  
C 9.809499 -2.126417 11.495334  
N 10.192139 -3.369675 10.818212  
C 8.284427 -1.947068 11.434290  
O 7.699984 -1.021785 11.952806  
O 7.646452 -2.893788 10.748329  
H 15.607726 -2.180284 8.630019  
H 13.691861 -2.901299 7.232582  
H 11.952076 -4.370351 8.181176  
H 14.025298 -4.407574 11.930353  
H 15.775471 -2.956860 10.978122  
H 11.132896 -5.752603 9.971006  
H 12.150444 -6.080980 11.373111  
H 11.469924 -3.949403 12.405938  
H 7.142089 -6.717496 11.442824  
H 8.185624 -7.154466 12.812417  
H 6.020981 -6.136668 13.598598  
H 7.397596 -5.127880 14.060208  
H 6.385635 -4.668850 12.677076  
H 12.414323 -1.785165 10.543636  
H 13.588453 -0.802012 12.493523  
H 12.115151 0.057810 12.960084  
H 12.176573 -1.705711 13.021036  
H 12.280840 0.260687 9.160256  
H 13.674234 0.312030 10.244144  
H 12.228403 1.257504 10.620258  
H 10.077548 -0.003264 11.370537  
H 10.206870 -0.834174 9.831194  
H 10.057860 -2.192033 12.557588

H 8.352926 -3.544327 10.495581  
H 10.749767 -3.166860 9.998840

1a-C97,  $\Delta G = 1.8775$  kcal/mol, population = 1.58 %

C 14.382287 -6.844617 10.335017  
C 13.169295 -7.144695 9.723806  
C 12.300552 -6.121032 9.358076  
C 12.627953 -4.786931 9.601581  
C 13.851986 -4.495751 10.206363  
C 14.723563 -5.515260 10.571272  
C 11.649568 -3.687269 9.281889  
C 10.875493 -3.187630 10.523085  
C 10.176513 -4.378730 11.170616  
O 10.926646 -4.898336 12.141009  
O 9.110037 -4.824675 10.810793  
C 10.518837 -6.180119 12.696326  
C 11.687762 -6.715372 13.487449  
C 11.241398 0.259240 11.516267  
C 11.568065 -0.168053 12.949108  
C 11.640528 1.719065 11.286118  
C 9.756140 0.071266 11.179805  
C 9.280633 -1.384835 11.166630  
N 9.893316 -2.196403 10.107576  
C 7.749185 -1.456863 11.034456  
O 6.986446 -0.808832 11.715907  
O 7.323851 -2.314450 10.109249  
H 15.059101 -7.639418 10.622019  
H 12.897911 -8.175197 9.531568  
H 11.354093 -6.361012 8.888043  
H 14.121724 -3.463593 10.398096  
H 15.669059 -5.273380 11.040554  
H 12.171854 -2.826242 8.858144  
H 10.920262 -4.028804 8.545646  
H 11.594319 -2.790207 11.244848  
H 9.635705 -6.018678 13.315038  
H 10.249438 -6.838591 11.871218  
H 11.422928 -7.682806 13.917325  
H 12.555811 -6.849249 12.840922  
H 11.953845 -6.039524 14.301267  
H 11.834687 -0.355896 10.830582  
H 11.348515 -1.221040 13.133526  
H 12.627551 -0.014828 13.163263  
H 10.990939 0.422699 13.665920  
H 11.071502 2.382501 11.943515

H 11.450143 2.023638 10.254744  
H 12.701485 1.871141 11.494156  
H 9.147889 0.624809 11.898024  
H 9.548985 0.503857 10.195304  
H 9.500203 -1.844547 12.133627  
H 8.158251 -2.710231 9.737888  
H 10.275737 -1.606520 9.378624

1a-C18,  $\Delta G = 1.8838$  kcal/mol, population = 1.56 %

C 14.748637 -2.862793 8.936638  
C 13.639145 -3.262753 8.201160  
C 12.687144 -4.102420 8.774930  
C 12.829966 -4.550373 10.088732  
C 13.954410 -4.148923 10.815542  
C 14.906355 -3.313289 10.245591  
C 11.753440 -5.377516 10.745343  
C 10.963100 -4.536173 11.772749  
C 9.953936 -5.437240 12.476881  
O 8.697741 -5.234963 12.081571  
O 10.286327 -6.266564 13.295685  
C 7.667735 -6.070959 12.681930  
C 6.346167 -5.659996 12.078988  
C 11.902567 -0.810040 10.813981  
C 13.035951 0.166886 11.133755  
C 10.951376 -0.216148 9.772490  
C 11.200021 -1.222950 12.115164  
C 10.058185 -2.241613 11.980464  
N 10.341924 -3.393927 11.118622  
C 8.717374 -1.623925 11.554324  
O 8.309400 -0.552972 11.940968  
O 7.995170 -2.414287 10.757196  
H 15.486535 -2.205000 8.495564  
H 13.508846 -2.919484 7.182689  
H 11.822013 -4.407223 8.197868  
H 14.080482 -4.488147 11.837103  
H 15.769761 -3.008370 10.823340  
H 11.062331 -5.762567 9.993294  
H 12.185415 -6.228983 11.271125  
H 11.666494 -4.222813 12.552378  
H 7.909226 -7.113159 12.473162  
H 7.692146 -5.920234 13.761233  
H 5.548435 -6.266903 12.510288  
H 6.131478 -4.611190 12.286132  
H 6.346107 -5.810939 10.998733

H 12.370345 -1.697341 10.378476  
H 12.642796 1.093913 11.560323  
H 13.736195 -0.265467 11.851691  
H 13.594176 0.420820 10.230473  
H 11.505199 0.081521 8.879906  
H 10.441430 0.666112 10.166270  
H 10.185313 -0.925609 9.451759  
H 11.948887 -1.650685 12.786184  
H 10.799825 -0.338275 12.615338  
H 9.843490 -2.627033 12.982275  
H 8.568004 -3.214804 10.618163  
H 10.915849 -3.105756 10.335661

1a-C73,  $\Delta G = 2.1542$  kcal/mol, population = 0.99 %

C 14.696998 -6.655592 9.953677  
C 13.449126 -7.012998 9.452829  
C 12.496097 -6.033558 9.190473  
C 12.774470 -4.687049 9.427364  
C 14.030897 -4.338302 9.926049  
C 14.986523 -5.313708 10.187503  
C 11.720341 -3.634321 9.206237  
C 10.995302 -3.230759 10.506995  
C 10.368977 -4.475614 11.129445  
O 11.109934 -4.933365 12.139375  
O 9.352017 -4.994452 10.727542  
C 10.702869 -6.184846 12.765428  
C 9.667958 -5.943862 13.843966  
C 11.198848 0.213246 11.638163  
C 11.645018 -0.251795 13.026348  
C 11.481190 1.706039 11.452146  
C 9.711472 -0.067328 11.384846  
C 9.345454 -1.553567 11.328727  
N 9.951812 -2.262334 10.194318  
C 7.818523 -1.734574 11.281687  
O 7.057552 -1.202911 12.059141  
O 7.396183 -2.543580 10.312435  
H 15.440528 -7.416037 10.156473  
H 13.217391 -8.053689 9.263360  
H 11.524548 -6.317375 8.803501  
H 14.261307 -3.295346 10.111129  
H 15.957628 -5.027183 10.571598  
H 12.172669 -2.730325 8.791704  
H 10.970464 -3.987006 8.496607  
H 11.732254 -2.838095 11.213033

H 10.333831 -6.853809 11.990017  
H 11.627208 -6.584263 13.175875  
H 9.438593 -6.888545 14.340672  
H 10.045249 -5.246538 14.593230  
H 8.745264 -5.545556 13.422410  
H 11.785976 -0.329883 10.889452  
H 11.514623 -1.325750 13.169879  
H 12.701746 -0.028415 13.185226  
H 11.071933 0.260267 13.804415  
H 12.540194 1.925079 11.602488  
H 10.910571 2.298948 12.172483  
H 11.205173 2.039211 10.449268  
H 9.112870 0.405308 12.165995  
H 9.410321 0.391559 10.437252  
H 9.659577 -2.034785 12.258535  
H 8.230950 -2.846074 9.862577  
H 10.279157 -1.608451 9.493430

1a-C9,  $\Delta G = 2.1793$  kcal/mol, population = 0.95 %

C 14.884806 -3.012772 9.366041  
C 13.876883 -3.286263 8.448953  
C 12.776579 -4.051325 8.829076  
C 12.668783 -4.551119 10.127450  
C 13.693102 -4.277580 11.038216  
C 14.791858 -3.515598 10.662044  
C 11.434242 -5.298558 10.566684  
C 10.576180 -4.435783 11.519059  
C 9.332929 -5.211421 11.943969  
O 9.659884 -6.193778 12.788915  
O 8.209911 -4.981425 11.557519  
C 8.589921 -7.052199 13.281241  
C 7.913410 -6.440152 14.489793  
C 11.974775 -0.750178 10.878310  
C 13.133372 0.117464 11.374810  
C 11.204855 -0.041260 9.762156  
C 11.091619 -1.154898 12.067495  
C 9.895270 -2.065321 11.749234  
N 10.187286 -3.197507 10.865092  
C 8.670210 -1.313636 11.204005  
O 8.307666 -0.229204 11.599473  
O 7.989825 -1.998957 10.283635  
H 15.737390 -2.412314 9.075704  
H 13.940904 -2.901518 7.439006  
H 11.990983 -4.256724 8.111430

H 13.625844 -4.658848 12.050414  
H 15.575086 -3.309321 11.380545  
H 10.833009 -5.571482 9.697483  
H 11.701210 -6.216890 11.088981  
H 11.165398 -4.251134 12.424406  
H 7.885764 -7.229066 12.470170  
H 9.093609 -7.983023 13.531178  
H 7.164700 -7.135393 14.874436  
H 8.637775 -6.245091 15.281751  
H 7.412469 -5.507609 14.230164  
H 12.423080 -1.655395 10.459541  
H 13.707337 -0.396896 12.148669  
H 13.814363 0.358710 10.556124  
H 12.764031 1.057038 11.795314  
H 11.883944 0.242774 8.955878  
H 10.721346 0.864796 10.134565  
H 10.430682 -0.673222 9.321477  
H 11.718957 -1.673125 12.796685  
H 10.706536 -0.260629 12.562366  
H 9.532450 -2.472541 12.698175  
H 8.506998 -2.841511 10.171117  
H 10.895126 -2.936266 10.190354

1a-C84,  $\Delta G = 2.1875$  kcal/mol, population = 0.94 %

C 13.844093 -4.961640 8.427689  
C 13.970316 -3.672030 8.931694  
C 13.423505 -3.350934 10.171334  
C 12.738901 -4.307601 10.923948  
C 12.630277 -5.604065 10.411143  
C 13.176490 -5.928817 9.175204  
C 12.096175 -3.941006 12.237842  
C 10.580061 -3.646579 12.110492  
C 9.788169 -4.912360 11.754328  
O 10.033794 -5.904477 12.608523  
O 9.016618 -4.996888 10.823309  
C 9.334565 -7.164321 12.390353  
C 9.810523 -8.134027 13.444392  
C 11.734283 0.112615 11.745020  
C 11.648302 0.353320 13.253271  
C 12.439057 1.277619 11.046327  
C 10.354473 -0.111193 11.113649  
C 9.625262 -1.371414 11.595865  
N 10.279803 -2.594418 11.164769  
C 8.164961 -1.337682 11.106129



O 7.406019 -0.424474 11.349476  
 O 7.781464 -2.393841 10.391480  
 H 14.269844 -5.215017 7.465121  
 H 14.497861 -2.915127 8.364929  
 H 13.544901 -2.347999 10.562917  
 H 12.125410 -6.367610 10.989532  
 H 13.085214 -6.939219 8.796563  
 H 12.227810 -4.743548 12.962185  
 H 12.565539 -3.046500 12.647519  
 H 10.225821 -3.352098 13.102254  
 H 8.263263 -6.975217 12.457217  
 H 9.561491 -7.509909 11.381843  
 H 9.586982 -7.764183 14.445777  
 H 9.302422 -9.090369 13.310482  
 H 10.885139 -8.302216 13.362982  
 H 12.338104 -0.784642 11.581205  
 H 11.022937 1.224258 13.469094  
 H 11.227722 -0.501176 13.786270  
 H 12.640183 0.540277 13.669503  
 H 13.438412 1.433169 11.457795  
 H 11.874880 2.205476 11.176691  
 H 12.539379 1.093384 9.974368  
 H 9.719073 0.751729 11.321069  
 H 10.456561 -0.172253 10.025049  
 H 9.558582 -1.348504 12.686785  
 H 8.544756 -3.027181 10.366410  
 H 11.013148 -2.446373 10.487237

1a-C55,  $\Delta G = 2.2597$  kcal/mol, population = 0.83 %

C 14.711029 -3.599095 7.931710  
 C 15.009858 -3.866537 9.266174  
 C 14.088735 -4.528312 10.068624  
 C 12.854753 -4.934482 9.552826  
 C 12.566582 -4.664141 8.214596  
 C 13.488059 -4.001426 7.407128  
 C 11.837556 -5.601468 10.443700  
 C 11.205522 -4.599569 11.432621  
 C 10.296455 -5.357392 12.393527  
 O 9.007187 -5.057674 12.250514  
 O 10.727573 -6.153538 13.198931  
 C 8.063666 -5.723635 13.137686  
 C 6.692911 -5.166777 12.838631  
 C 11.025484 0.076403 12.047307  
 C 12.024245 1.122812 11.545720

C 11.266652 -0.237898 13.525223  
C 11.124290 -1.176422 11.167609  
C 10.174975 -2.343210 11.487118  
N 10.519012 -3.541024 10.703440  
C 8.701194 -1.995725 11.234438  
O 8.120232 -1.079321 11.773017  
O 8.098431 -2.797387 10.357053  
H 15.428706 -3.082880 7.306768  
H 15.962655 -3.560793 9.680032  
H 14.329364 -4.733648 11.105330  
H 11.614890 -4.976315 7.800770  
H 13.248077 -3.800319 6.370609  
H 11.045088 -6.048284 9.840583  
H 12.302450 -6.395801 11.027448  
H 12.010441 -4.196123 12.060472  
H 8.122445 -6.796318 12.953003  
H 8.369530 -5.532670 14.166186  
H 6.410606 -5.357009 11.802745  
H 5.959959 -5.646681 13.489202  
H 6.661038 -4.091629 13.017412  
H 10.018907 0.486175 11.945706  
H 11.847179 1.368974 10.496114  
H 11.946822 2.044579 12.125976  
H 13.050998 0.755707 11.635616  
H 11.259785 0.679057 14.118052  
H 12.238655 -0.720205 13.666604  
H 10.499562 -0.896986 13.935001  
H 10.981540 -0.894625 10.119493  
H 12.141191 -1.575959 11.247554  
H 10.245096 -2.582671 12.548669  
H 8.783521 -3.494407 10.164138  
H 11.088853 -3.274480 9.907347

1a-C8,  $\Delta G = 2.2672$  kcal/mol, population = 0.82 %

C 14.847075 -3.118581 9.408735  
C 14.762511 -3.484769 10.750408  
C 13.666568 -4.203618 11.209946  
C 12.635895 -4.568465 10.339259  
C 12.734754 -4.205000 8.995689  
C 13.833033 -3.484438 8.531585  
C 11.404781 -5.265205 10.862497  
C 10.562906 -4.312471 11.740769  
C 9.323905 -5.044915 12.246895  
O 9.656238 -5.927344 13.194134

O 8.199600 -4.863716 11.838829  
 C 8.602601 -6.782047 13.726141  
 C 8.372033 -7.983241 12.833366  
 C 11.955578 -0.698448 10.673905  
 C 13.156518 0.176421 11.040733  
 C 11.135945 -0.052876 9.554715  
 C 11.135402 -0.996204 11.937386  
 C 9.921614 -1.921457 11.762673  
 N 10.168928 -3.137142 10.982169  
 C 8.674479 -1.216529 11.205263  
 O 8.332289 -0.097968 11.514144  
 O 7.950443 -1.980704 10.385738  
 H 15.697869 -2.552157 9.052349  
 H 15.549991 -3.205497 11.438958  
 H 13.605662 -4.478013 12.256582  
 H 11.943665 -4.481276 8.308442  
 H 13.890331 -3.205842 7.486955  
 H 10.791368 -5.616711 10.030838  
 H 11.675063 -6.131281 11.466181  
 H 11.163845 -4.048087 12.617840  
 H 8.972182 -7.074601 14.706052  
 H 7.699425 -6.185888 13.843981  
 H 9.294233 -8.550919 12.702440  
 H 7.629210 -8.637570 13.293605  
 H 8.000627 -7.680377 11.854373  
 H 12.363026 -1.640581 10.296593  
 H 13.788909 0.350629 10.167864  
 H 12.829245 1.148468 11.420377  
 H 13.769176 -0.298771 11.809753  
 H 11.773967 0.161368 8.695061  
 H 10.689796 0.886371 9.889640  
 H 10.327853 -0.697244 9.201825  
 H 11.798914 -1.456700 12.673404  
 H 10.781002 -0.060424 12.375514  
 H 9.603040 -2.231901 12.762737  
 H 8.458585 -2.834131 10.329287  
 H 10.854875 -2.953849 10.260919

1a-C7,  $\Delta G = 2.3048$  kcal/mol, population = 0.77 %

C 14.817164 -2.845786 9.045836  
 C 14.914502 -3.384493 10.326979  
 C 13.922419 -4.231239 10.805116  
 C 12.817671 -4.555258 10.012900  
 C 12.735512 -4.019490 8.726743

C 13.727703 -3.168529 8.245291  
C 11.694435 -5.389693 10.575165  
C 10.874068 -4.577949 11.602792  
C 9.804891 -5.477817 12.213296  
O 8.580532 -5.231312 11.744865  
O 10.072136 -6.338369 13.023268  
C 7.475020 -6.013727 12.283041  
C 6.940229 -5.382670 13.551251  
C 11.915619 -0.814760 10.940558  
C 13.027542 0.131488 11.398511  
C 11.049409 -0.154687 9.865773  
C 11.113068 -1.291009 12.160303  
C 9.977283 -2.287856 11.879691  
N 10.319476 -3.388891 10.973783  
C 8.677640 -1.631530 11.387844  
O 8.242471 -0.585557 11.811480  
O 8.023035 -2.359878 10.481015  
H 15.586477 -2.180061 8.676045  
H 15.762361 -3.140397 10.954499  
H 14.001215 -4.640074 11.805722  
H 11.885707 -4.264149 8.100248  
H 13.644637 -2.756494 7.247576  
H 11.032259 -5.721016 9.773254  
H 12.082166 -6.275497 11.078244  
H 11.543687 -4.322507 12.431805  
H 6.735000 -6.004818 11.486359  
H 7.817611 -7.033221 12.448871  
H 6.631501 -4.352483 13.369266  
H 6.070989 -5.945563 13.896507  
H 7.690235 -5.393113 14.342299  
H 12.409834 -1.682429 10.493815  
H 13.669819 -0.346010 12.141722  
H 13.653597 0.429989 10.555251  
H 12.608338 1.037214 11.845474  
H 11.670759 0.185843 9.035235  
H 10.517157 0.709549 10.269685  
H 10.305204 -0.837205 9.450063  
H 11.805043 -1.763628 12.861532  
H 10.681519 -0.430632 12.676896  
H 9.683992 -2.728450 12.837683  
H 8.606989 -3.152521 10.337446  
H 10.958709 -3.062297 10.259104

1a-C77,  $\Delta G = 2.3092$  kcal/mol, population = 0.76 %

C 14.234536 -4.842002 8.757386  
C 13.384690 -5.795761 9.312645  
C 12.651992 -5.499887 10.456011  
C 12.750782 -4.244230 11.064181  
C 13.616772 -3.302490 10.505825  
C 14.352824 -3.595127 9.360663  
C 11.921163 -3.893750 12.274293  
C 10.433480 -3.628709 11.938472  
C 9.674411 -4.909625 11.565218  
O 9.910982 -5.893964 12.431539  
O 8.918513 -5.006255 10.623194  
C 9.211871 -7.154476 12.218431  
C 9.650950 -8.103865 13.306456  
C 11.716117 0.019141 10.283897  
C 12.295854 0.370097 11.654248  
C 12.026219 1.114963 9.261057  
C 10.200564 -0.217792 10.332905  
C 9.732385 -1.318776 11.297603  
N 10.237388 -2.624814 10.908589  
C 8.196606 -1.326792 11.277221  
O 7.522111 -0.456033 11.780492  
O 7.646804 -2.353756 10.627610  
H 14.804545 -5.073411 7.866545  
H 13.296004 -6.773875 8.856547  
H 12.008393 -6.256301 10.886403  
H 13.726965 -2.334991 10.979424  
H 15.018438 -2.849444 8.944284  
H 11.970102 -4.688372 13.017809  
H 12.315668 -2.989047 12.737240  
H 9.955854 -3.283005 12.860249  
H 8.140099 -6.959110 12.248801  
H 9.467558 -7.522095 11.224592  
H 9.395473 -7.713755 14.292404  
H 9.145238 -9.061779 13.174942  
H 10.727250 -8.275309 13.263704  
H 12.203299 -0.895410 9.932865  
H 13.368807 0.558115 11.580912  
H 11.823074 1.271433 12.054242  
H 12.152811 -0.431439 12.380736  
H 11.634118 0.857734 8.274684  
H 13.103489 1.265916 9.167766  
H 11.578438 2.065419 9.564258  
H 9.704628 0.709112 10.629030  
H 9.842961 -0.462838 9.328117

H 10.022147 -1.048838 12.317856  
H 8.381980 -2.961876 10.360494  
H 11.016387 -2.579326 10.267874

1a-C26,  $\Delta G = 2.4360$  kcal/mol, population = 0.62 %

C 14.738195 -3.704269 7.940708  
C 15.001861 -4.088003 9.253967  
C 14.019979 -4.720498 10.006554  
C 12.759879 -4.981115 9.460746  
C 12.507381 -4.596254 8.143372  
C 13.489414 -3.961816 7.386479  
C 11.680739 -5.615416 10.301216  
C 11.115814 -4.623197 11.340413  
C 10.120100 -5.355545 12.231664  
O 8.850828 -5.081777 11.930538  
O 10.473562 -6.118744 13.103380  
C 7.806508 -5.674594 12.755754  
C 7.545449 -4.817799 13.976623  
C 11.015109 0.074024 12.209116  
C 12.024666 1.141819 11.779062  
C 11.211386 -0.297390 13.680225  
C 11.146031 -1.143089 11.284972  
C 10.197951 -2.328194 11.535076  
N 10.538150 -3.467296 10.666313  
C 8.725409 -1.955994 11.310304  
O 8.131776 -1.125026 11.961558  
O 8.143221 -2.626425 10.316598  
H 15.503007 -3.210652 7.354623  
H 15.974139 -3.895527 9.690085  
H 14.232658 -5.017380 11.027065  
H 11.535624 -4.795030 7.706985  
H 13.276839 -3.670085 6.365630  
H 10.863780 -5.961382 9.665804  
H 12.074844 -6.476784 10.841266  
H 11.935045 -4.329561 12.008066  
H 6.941969 -5.711693 12.097446  
H 8.104535 -6.686623 13.022469  
H 7.285435 -3.799682 13.684290  
H 6.711113 -5.236959 14.541964  
H 8.418732 -4.786112 14.628440  
H 10.010731 0.485802 12.093096  
H 11.875788 1.431533 10.736300  
H 11.928993 2.038173 12.395165  
H 13.049356 0.772435 11.881816

H 12.178566 -0.786161 13.832003  
H 10.431476 -0.970662 14.039086  
H 11.186551 0.595765 14.307943  
H 11.025326 -0.822004 10.245384  
H 12.163146 -1.539289 11.375150  
H 10.275820 -2.633349 12.579389  
H 8.828710 -3.300318 10.055150  
H 11.175294 -3.167934 9.935872

1a-C40,  $\Delta G = 2.5013$  kcal/mol, population = 0.55 %

C 13.699213 -4.884737 8.102419  
C 13.148678 -5.883934 8.901394  
C 12.718594 -5.591365 10.190205  
C 12.829037 -4.296056 10.704899  
C 13.397589 -3.306550 9.899531  
C 13.827271 -3.595506 8.607079  
C 12.302109 -3.964000 12.077925  
C 10.775140 -3.698605 12.090040  
C 9.982643 -4.979185 11.794785  
O 10.299591 -5.957165 12.643787  
O 9.161428 -5.083172 10.909646  
C 9.600914 -7.230712 12.511331  
C 8.277763 -7.205240 13.246334  
C 11.775116 0.046715 11.877598  
C 11.704279 0.193425 13.398805  
C 12.454102 1.263211 11.244333  
C 10.392694 -0.162087 11.248057  
C 9.691287 -1.462025 11.662218  
N 10.375959 -2.648893 11.180243  
C 8.229980 -1.444327 11.173852  
O 7.855758 -2.509282 10.467329  
O 7.460746 -0.539584 11.416205  
H 14.033686 -5.112799 7.098356  
H 13.057326 -6.893549 8.520685  
H 12.302359 -6.378410 10.806685  
H 13.519775 -2.302950 10.289645  
H 14.265378 -2.813989 7.999026  
H 12.513554 -4.774299 12.774172  
H 12.789576 -3.066452 12.458865  
H 10.505071 -3.417766 13.111657  
H 9.472236 -7.445175 11.452002  
H 10.288761 -7.952531 12.945250  
H 7.597046 -6.476681 12.806234  
H 7.812322 -8.190714 13.183179

H 8.424466 -6.963120 14.299736  
H 12.389781 -0.829824 11.652271  
H 11.071422 1.041464 13.675314  
H 11.300837 -0.697077 13.883863  
H 12.699009 0.367432 13.813809  
H 12.545250 1.145957 10.162230  
H 13.455364 1.409728 11.654464  
H 11.876896 2.172087 11.436505  
H 9.743677 0.675742 11.509492  
H 10.485573 -0.158487 10.156880  
H 9.621264 -1.497488 12.752712  
H 8.629219 -3.129753 10.435909  
H 11.059886 -2.459959 10.462437

1a-C46,  $\Delta G = 2.5483$  kcal/mol, population = 0.51 %

C 14.991107 -6.368958 9.738453  
C 15.158993 -4.986750 9.713232  
C 14.061552 -4.154199 9.524298  
C 12.782042 -4.688100 9.357669  
C 12.624851 -6.074413 9.381733  
C 13.720779 -6.910928 9.571141  
C 11.586123 -3.783738 9.210754  
C 11.105583 -3.215665 10.559936  
C 10.826772 -4.351443 11.540695  
O 9.747177 -5.054393 11.192002  
O 11.522430 -4.589305 12.501900  
C 9.346637 -6.159876 12.052594  
C 8.479767 -5.667647 13.192510  
C 11.063851 0.315611 11.360108  
C 11.777403 0.016096 12.680335  
C 11.134756 1.809836 11.034969  
C 9.598495 -0.139263 11.375513  
C 9.398655 -1.653140 11.496616  
N 9.904792 -2.410818 10.343692  
C 7.910175 -1.988041 11.699711  
O 7.445890 -2.916253 10.865330  
O 7.216588 -1.471256 12.546470  
H 15.845304 -7.018052 9.884332  
H 16.145462 -4.557763 9.837820  
H 14.198865 -3.079117 9.503277  
H 11.636968 -6.500723 9.253688  
H 13.582045 -7.984793 9.585865  
H 11.831298 -2.935547 8.567079  
H 10.755466 -4.320261 8.751634



H 11.917328 -2.637184 11.009779  
H 8.799375 -6.824403 11.388341  
H 10.243132 -6.663093 12.409685  
H 7.603037 -5.143155 12.811709  
H 8.142143 -6.520906 13.783722  
H 9.035601 -4.996742 13.847822  
H 11.586386 -0.219655 10.559374  
H 11.279601 0.525361 13.510197  
H 11.801870 -1.050226 12.910952  
H 12.811505 0.364192 12.644444  
H 12.171118 2.150311 10.989263  
H 10.622679 2.396658 11.802788  
H 10.663312 2.028815 10.074470  
H 9.076662 0.341965 12.205154  
H 9.103996 0.195821 10.457584  
H 9.894605 -2.009147 12.402772  
H 8.238608 -3.164871 10.315377  
H 10.037966 -1.802202 9.544298

1a-C62,  $\Delta G = 2.5521$  kcal/mol, population = 0.51 %

C 12.610386 -6.104449 7.727568  
C 12.776232 -4.725028 7.643280  
C 13.011034 -3.978589 8.793286  
C 13.080420 -4.594689 10.044398  
C 12.925883 -5.980787 10.114742  
C 12.690779 -6.731216 8.967290  
C 13.261831 -3.782749 11.301171  
C 11.928092 -3.280758 11.908540  
C 11.063591 -4.488188 12.249722  
O 10.083404 -4.692266 11.372428  
O 11.292045 -5.194197 13.207147  
C 9.200144 -5.831685 11.578694  
C 8.061847 -5.467464 12.507984  
C 11.054198 0.193377 12.770409  
C 10.525856 -0.277574 14.127080  
C 11.242998 1.712419 12.762173  
C 10.132554 -0.219651 11.614888  
C 10.019202 -1.734445 11.403315  
N 11.284754 -2.351885 10.986583  
C 8.945590 -2.036227 10.344783  
O 7.787129 -1.699657 10.455582  
O 9.400333 -2.686006 9.275976  
H 12.427382 -6.686720 6.833295  
H 12.724508 -4.229622 6.681730

H 13.144177 -2.906621 8.716367  
H 12.987206 -6.476573 11.076264  
H 12.572327 -7.805044 9.041776  
H 13.769465 -4.371586 12.064865  
H 13.881116 -2.904871 11.105849  
H 12.162205 -2.811695 12.870464  
H 8.844478 -6.069021 10.579069  
H 9.789773 -6.662657 11.960843  
H 7.376955 -6.313540 12.589151  
H 8.429962 -5.228445 13.505804  
H 7.505919 -4.612429 12.121317  
H 12.037616 -0.262353 12.609720  
H 10.446696 -1.364226 14.190638  
H 11.189016 0.047570 14.930942  
H 9.534066 0.141364 14.318508  
H 10.287334 2.220341 12.919929  
H 11.653180 2.055736 11.809971  
H 11.923404 2.025448 13.556541  
H 9.130473 0.177984 11.789187  
H 10.491996 0.231272 10.683999  
H 9.663399 -2.197281 12.324098  
H 10.345777 -2.895413 9.509066  
H 11.952522 -1.640100 10.715069

1a-C42,  $\Delta G = 2.5948$  kcal/mol, population = 0.47 %

C 14.674137 -3.787019 8.021717  
C 14.960888 -4.008939 9.367130  
C 14.009286 -4.589321 10.196441  
C 12.757471 -4.959414 9.697118  
C 12.482030 -4.737383 8.347251  
C 13.433507 -4.154683 7.513371  
C 11.711032 -5.532308 10.618849  
C 11.116409 -4.445976 11.541777  
C 10.174220 -5.114341 12.535888  
O 8.886830 -4.895069 12.268589  
O 10.581931 -5.786980 13.457299  
C 7.894561 -5.525008 13.130227  
C 7.595222 -6.935882 12.669699  
C 11.124792 0.247576 11.904005  
C 12.222220 1.192508 11.406889  
C 11.256347 0.009813 13.409665  
C 11.187014 -1.060235 11.104392  
C 10.167108 -2.156642 11.449167  
N 10.469847 -3.413138 10.744283

C 8.716848 -1.756687 11.137738  
O 8.185295 -0.752179 11.556290  
O 8.071282 -2.628951 10.363901  
H 15.414830 -3.333263 7.375538  
H 15.927181 -3.730417 9.768724  
H 14.239068 -4.758823 11.242008  
H 11.516958 -5.023242 7.945568  
H 13.203363 -3.989257 6.468350  
H 10.902808 -5.982563 10.039874  
H 12.143554 -6.307874 11.251063  
H 11.933485 -4.036509 12.148481  
H 8.260162 -5.501876 14.155164  
H 7.024358 -4.879210 13.040868  
H 6.798015 -7.354937 13.286649  
H 7.262708 -6.940700 11.630879  
H 8.472651 -7.575642 12.764002  
H 10.157310 0.716324 11.716323  
H 13.213650 0.765375 11.584729  
H 12.126494 1.382873 10.335417  
H 12.173677 2.152078 11.925789  
H 10.417734 -0.562571 13.809521  
H 11.287578 0.960274 13.946353  
H 12.177958 -0.533720 13.638907  
H 11.098764 -0.834743 10.036788  
H 12.177349 -1.505900 11.248304  
H 10.191740 -2.346655 12.523652  
H 8.729858 -3.366792 10.238706  
H 11.045907 -3.219138 9.931766

1a-C38,  $\Delta G = 2.6305$  kcal/mol, population = 0.44 %

C 14.602504 -6.922437 11.075717  
C 14.496832 -5.872001 11.984681  
C 13.678233 -4.784922 11.702222  
C 12.950804 -4.730075 10.510524  
C 13.066375 -5.785713 9.606429  
C 13.887350 -6.874431 9.884194  
C 12.020775 -3.577581 10.232520  
C 10.738613 -3.620057 11.097926  
C 10.005545 -4.927769 10.840513  
O 10.094794 -5.762418 11.875998  
O 9.426043 -5.167719 9.804070  
C 9.513271 -7.092665 11.731545  
C 10.482898 -8.035457 11.051449  
C 10.225722 1.312539 10.514335

C 9.671566 2.217676 9.410567  
C 11.742685 1.473221 10.635384  
C 9.818033 -0.137589 10.228418  
C 10.233206 -1.194449 11.267068  
N 9.805601 -2.524771 10.818910  
C 9.581300 -0.910407 12.627313  
O 9.946919 -0.042943 13.386795  
O 8.538861 -1.701266 12.898102  
H 15.240001 -7.769625 11.295101  
H 15.054921 -5.899256 12.912342  
H 13.603507 -3.969568 12.412640  
H 12.504119 -5.757091 8.680708  
H 13.963562 -7.686255 9.171676  
H 12.527482 -2.630264 10.424612  
H 11.720084 -3.582971 9.183370  
H 11.008205 -3.581654 12.152653  
H 9.304997 -7.397871 12.754158  
H 8.577507 -7.004425 11.182629  
H 10.064296 -9.043674 11.051303  
H 10.665526 -7.737243 10.019956  
H 11.436628 -8.055593 11.579507  
H 9.774405 1.618239 11.461264  
H 9.911206 3.263931 9.610418  
H 10.102159 1.955348 8.439763  
H 8.585659 2.128704 9.331494  
H 12.146186 0.917445 11.482580  
H 12.005978 2.523574 10.776002  
H 12.242819 1.121444 9.728065  
H 8.732821 -0.191111 10.100007  
H 10.265786 -0.443564 9.277193  
H 11.312052 -1.143938 11.420087  
H 8.523503 -2.344393 12.140060  
H 9.552162 -2.525983 9.837768

1a-C72,  $\Delta G = 2.6531$  kcal/mol, population = 0.43 %

C 14.974505 -6.110868 10.539854  
C 14.948704 -4.992464 11.369229  
C 13.937582 -4.047630 11.234844  
C 12.939151 -4.203791 10.271158  
C 12.976005 -5.326185 9.442673  
C 13.985763 -6.274411 9.574686  
C 11.809053 -3.212851 10.175934  
C 10.702692 -3.476189 11.227515  
C 10.134842 -4.868418 11.001775

O 10.573847 -5.740404 11.908523  
 O 9.398581 -5.138812 10.078369  
 C 10.170960 -7.134361 11.759574  
 C 8.823401 -7.383847 12.402996  
 C 9.911786 0.040500 9.351996  
 C 11.302743 0.667025 9.467756  
 C 9.021958 0.870122 8.423287  
 C 9.235932 -0.108156 10.722845  
 C 9.868904 -1.164730 11.638703  
 N 9.589721 -2.526675 11.173465  
 C 9.306633 -1.001574 13.060255  
 O 8.512178 -2.001612 13.443998  
 O 9.540020 -0.047774 13.766902  
 H 15.761815 -6.846872 10.643339  
 H 15.717952 -4.855336 12.119030  
 H 13.922745 -3.178763 11.882986  
 H 12.206253 -5.459614 8.691730  
 H 14.000800 -7.138956 8.922752  
 H 12.185748 -2.201393 10.328433  
 H 11.352300 -3.250402 9.185363  
 H 11.138043 -3.439435 12.225361  
 H 10.167096 -7.380822 10.699357  
 H 10.963752 -7.688714 12.255867  
 H 8.036128 -6.825909 11.896397  
 H 8.585151 -8.447341 12.339800  
 H 8.838571 -7.098842 13.455808  
 H 10.020449 -0.953362 8.904565  
 H 11.969340 0.089256 10.109856  
 H 11.775759 0.738994 8.486570  
 H 11.233094 1.675738 9.884019  
 H 8.043340 0.403605 8.292148  
 H 9.480891 0.978332 7.438590  
 H 8.865858 1.872468 8.831916  
 H 9.261093 0.853222 11.239930  
 H 8.180981 -0.367027 10.588646  
 H 10.942100 -0.978680 11.718427  
 H 8.535154 -2.630327 12.672385  
 H 9.156677 -2.540056 10.257982

1a-C30,  $\Delta G = 2.6845$  kcal/mol, population = 0.40 %

C 13.776489 -4.812925 8.434998  
 C 13.177571 -5.815479 9.194074  
 C 12.671374 -5.527833 10.455797  
 C 12.751585 -4.235876 10.983283

C 13.367591 -3.242817 10.218474  
C 13.874142 -3.526257 8.952779  
C 12.145572 -3.912824 12.325786  
C 10.614989 -3.675722 12.258769  
C 9.848107 -4.977046 11.983126  
O 10.132187 -5.913293 12.889473  
O 9.055498 -5.122769 11.078052  
C 9.428409 -7.188540 12.800435  
C 10.114473 -8.136016 11.839516  
C 11.583186 0.102468 11.869498  
C 11.467769 0.374168 13.370470  
C 12.262273 1.273099 11.154853  
C 10.220935 -0.179688 11.224273  
C 9.536474 -1.463015 11.712108  
N 10.239794 -2.664276 11.296370  
C 8.077214 -1.491160 11.218763  
O 7.288921 -0.595297 11.431057  
O 7.728252 -2.583205 10.541337  
H 14.170769 -5.036070 7.451747  
H 13.107894 -6.823282 8.804122  
H 12.218395 -6.316433 11.041809  
H 13.464565 -2.240918 10.619051  
H 14.347945 -2.742035 8.375750  
H 12.336101 -4.718218 13.033858  
H 12.595651 -3.006001 12.729905  
H 10.295637 -3.362893 13.256626  
H 9.448301 -7.567904 13.819251  
H 8.398726 -6.993041 12.507009  
H 11.150714 -8.308229 12.133788  
H 9.594705 -9.095891 11.852937  
H 10.091925 -7.751261 10.820186  
H 12.216702 -0.778944 11.734903  
H 10.813876 1.230648 13.557579  
H 11.065347 -0.480293 13.917227  
H 12.447471 0.600236 13.796122  
H 11.666195 2.184953 11.252046  
H 12.387798 1.066189 10.089748  
H 13.248366 1.471266 11.579786  
H 9.550020 0.660217 11.413383  
H 10.338854 -0.249387 10.137722  
H 9.463570 -1.436124 12.802834  
H 8.512677 -3.190366 10.534910  
H 10.948207 -2.498455 10.596670

1a-C11,  $\Delta G = 2.6989$  kcal/mol, population = 0.39 %

C 14.776695 -2.972654 9.056706  
C 13.703081 -3.437899 8.306569  
C 12.725245 -4.229923 8.904245  
C 12.807183 -4.566224 10.255945  
C 13.895997 -4.099855 10.998084  
C 14.872829 -3.310271 10.405017  
C 11.701720 -5.343056 10.926343  
C 10.880818 -4.432823 11.867044  
C 9.829060 -5.277353 12.579112  
O 8.585735 -5.036959 12.160116  
O 10.123295 -6.090053 13.428329  
C 7.509107 -5.828196 12.742562  
C 7.345539 -7.142067 12.008226  
C 11.892652 -0.765342 10.675803  
C 13.044992 0.201535 10.956379  
C 10.961544 -0.203023 9.599887  
C 11.172903 -1.099956 11.990583  
C 10.020456 -2.112429 11.899320  
N 10.310241 -3.320988 11.121051  
C 8.695644 -1.510340 11.405733  
O 8.285105 -0.418525 11.725649  
O 7.990209 -2.336471 10.630042  
H 15.534249 -2.351341 8.596461  
H 13.620737 -3.182098 7.257794  
H 11.887162 -4.585051 8.316186  
H 13.975318 -4.351926 12.049116  
H 15.707478 -2.953103 10.994889  
H 11.035766 -5.772078 10.175174  
H 12.106253 -6.161877 11.521092  
H 11.553370 -4.084317 12.659048  
H 7.721461 -5.978428 13.799450  
H 6.631800 -5.194783 12.635345  
H 8.232166 -7.766606 12.117667  
H 6.492440 -7.682886 12.422295  
H 7.160492 -6.971761 10.946832  
H 12.344942 -1.682621 10.288151  
H 12.669228 1.154550 11.339243  
H 13.610793 0.403458 10.044658  
H 13.734885 -0.211986 11.695058  
H 11.527326 0.034776 8.696974  
H 10.472082 0.710302 9.945566  
H 10.180560 -0.909893 9.312711  
H 11.910283 -1.500652 12.690408

H 10.778855 -0.185330 12.439387  
H 9.782256 -2.428229 12.919772  
H 8.561157 -3.147119 10.552222  
H 10.919169 -3.093079 10.344550

1a-C67,  $\Delta G = 2.7064$  kcal/mol, population = 0.39 %

C 14.931720 -3.210106 9.233874  
C 13.916841 -3.533705 8.341146  
C 12.781838 -4.205288 8.788509  
C 12.648007 -4.566300 10.129407  
C 13.676356 -4.238682 11.017789  
C 14.808606 -3.565992 10.575307  
C 11.396375 -5.250004 10.621783  
C 10.571752 -4.332038 11.549996  
C 9.312118 -5.066599 11.994506  
O 9.605927 -5.989217 12.913750  
O 8.200554 -4.861371 11.563091  
C 8.512337 -6.820515 13.396669  
C 9.084585 -7.777570 14.414223  
C 11.374443 0.013277 11.103117  
C 11.893376 -0.609754 9.803825  
C 12.460398 0.885401 11.740121  
C 10.885619 -1.010120 12.140302  
C 9.784088 -1.994426 11.715972  
N 10.216135 -3.105435 10.855304  
C 8.572350 -1.305951 11.073407  
O 8.063305 -1.972041 10.037044  
O 8.090577 -0.272385 11.479174  
H 15.812813 -2.683650 8.889738  
H 14.002585 -3.259040 7.297391  
H 11.989817 -4.448248 8.090231  
H 13.589438 -4.511786 12.062959  
H 15.596090 -3.318968 11.276171  
H 10.775427 -5.542229 9.773209  
H 11.646061 -6.153738 11.178197  
H 11.167381 -4.134582 12.449027  
H 7.753082 -6.168424 13.828367  
H 8.075955 -7.341212 12.544094  
H 9.523487 -7.238353 15.254665  
H 8.287278 -8.417225 14.796225  
H 9.849217 -8.413550 13.966342  
H 10.529120 0.660580 10.853039  
H 12.320974 0.161341 9.159937  
H 12.678980 -1.344119 9.999879



H 11.101939 -1.092326 9.226314  
H 12.780111 1.672121 11.053770  
H 13.338549 0.284271 11.993234  
H 12.102586 1.359805 12.656510  
H 11.733677 -1.608406 12.488944  
H 10.519477 -0.460017 13.008939  
H 9.378016 -2.433936 12.631246  
H 8.644092 -2.777294 9.958902  
H 10.993889 -2.819300 10.275277

1a-C79,  $\Delta G = 2.7705$  kcal/mol, population = 0.35 %

C 14.309260 -4.650465 9.082330  
C 13.740804 -5.774603 9.675379  
C 12.952781 -5.641073 10.813052  
C 12.717366 -4.384317 11.376943  
C 13.304129 -3.266457 10.780715  
C 14.092518 -3.395062 9.641415  
C 11.815965 -4.233394 12.572153  
C 10.318911 -4.043272 12.191821  
C 9.818375 -5.268883 11.440168  
O 9.791337 -6.340495 12.236561  
O 9.518551 -5.282617 10.268678  
C 9.402272 -7.606959 11.631824  
C 9.489801 -8.666320 12.703489  
C 10.848490 0.908635 11.407879  
C 11.060651 1.812432 10.190267  
C 12.056547 0.972144 12.345508  
C 10.557791 -0.519236 10.931128  
C 10.254496 -1.563724 12.021574  
N 10.016894 -2.861803 11.391517  
C 8.989184 -1.164355 12.790233  
O 7.881800 -1.770292 12.346707  
O 8.964166 -0.358202 13.690621  
H 14.923588 -4.753907 8.196895  
H 13.914474 -6.756777 9.253717  
H 12.521170 -6.522302 11.272643  
H 13.157217 -2.287955 11.220571  
H 14.540050 -2.515907 9.194940  
H 11.883034 -5.109733 13.216454  
H 12.123158 -3.374998 13.169738  
H 9.753719 -3.982515 13.124526  
H 8.390954 -7.501979 11.239148  
H 10.075649 -7.809486 10.798754  
H 9.203727 -9.631079 12.281468

H 10.506800 -8.748714 13.089062  
H 8.816753 -8.441306 13.531706  
H 9.975060 1.276001 11.952791  
H 10.194807 1.792794 9.524651  
H 11.226191 2.846383 10.499273  
H 11.934230 1.490674 9.615911  
H 12.271274 2.005981 12.623390  
H 12.947303 0.565899 11.856974  
H 11.889255 0.411782 13.266060  
H 9.718288 -0.505123 10.230348  
H 11.425577 -0.884116 10.373181  
H 11.072076 -1.584410 12.743722  
H 8.210418 -2.416398 11.669412  
H 10.446254 -2.926886 10.476826

1a-C50,  $\Delta G = 2.8859$  kcal/mol, population = 0.29 %

C 14.679371 -6.348922 11.243381  
C 14.456171 -5.350630 12.189097  
C 13.548113 -4.331667 11.926889  
C 12.846395 -4.294836 10.719278  
C 13.079494 -5.297725 9.778493  
C 13.990804 -6.317459 10.035810  
C 11.821288 -3.221193 10.460519  
C 10.532286 -3.409203 11.294523  
C 9.940922 -4.778838 10.995443  
O 10.100187 -5.624321 12.013078  
O 9.403580 -5.050890 9.944301  
C 9.654280 -7.001815 11.831318  
C 10.710288 -7.826629 11.126938  
C 10.341366 0.073629 9.249770  
C 11.711350 0.628700 9.644164  
C 9.718127 0.918639 8.136000  
C 9.384365 0.007308 10.448211  
C 9.747028 -1.050188 11.500192  
N 9.495185 -2.411979 11.018072  
C 8.910521 -0.809340 12.767606  
O 8.009443 -1.762204 13.008734  
O 9.036507 0.162008 13.477819  
H 15.386763 -7.142906 11.446879  
H 14.992556 -5.365018 13.129737  
H 13.383193 -3.556547 12.666556  
H 12.538975 -5.282520 8.839610  
H 14.157732 -7.089039 9.294642  
H 12.238010 -2.241465 10.696820

H 11.544622 -3.215376 9.404977  
H 10.773407 -3.365620 12.355553  
H 9.479349 -7.353218 12.845281  
H 8.713065 -6.992122 11.284607  
H 11.663471 -7.764346 11.652536  
H 10.393535 -8.871119 11.104133  
H 10.857547 -7.488261 10.102274  
H 10.481819 -0.938738 8.856224  
H 11.615919 1.655081 10.008850  
H 12.190294 0.042163 10.429821  
H 12.385650 0.637285 8.785789  
H 8.764204 0.500104 7.808246  
H 10.380806 0.971586 7.269938  
H 9.537056 1.940207 8.481966  
H 9.357727 0.982495 10.938701  
H 8.367448 -0.198512 10.099314  
H 10.788249 -0.918783 11.801461  
H 8.161372 -2.420551 12.277382  
H 9.241511 -2.430838 10.037818

1a-C13,  $\Delta G = 2.9135$  kcal/mol, population = 0.27 %

C 14.805161 -3.828874 8.436012  
C 14.880996 -3.978616 9.819280  
C 13.811644 -4.519291 10.522339  
C 12.649400 -4.919642 9.857187  
C 12.585914 -4.770518 8.471509  
C 13.656219 -4.228909 7.763437  
C 11.469014 -5.446675 10.633555  
C 10.780596 -4.321460 11.435703  
C 9.621249 -4.892297 12.247032  
O 10.041774 -5.754454 13.162722  
O 8.452393 -4.589871 12.085124  
C 9.043909 -6.419953 13.996534  
C 8.478178 -7.636429 13.295865  
C 11.255262 0.210273 11.879611  
C 12.297693 1.217579 11.389227  
C 11.543029 -0.196626 13.327578  
C 11.224070 -1.005842 10.942153  
C 10.062822 -1.976258 11.155602  
N 10.284835 -3.292474 10.548249  
C 8.717775 -1.438835 10.646243  
O 8.544542 -0.327403 10.199513  
O 7.700559 -2.301452 10.741396  
H 15.637706 -3.405634 7.888466

H 15.775068 -3.674603 10.349204  
H 13.878750 -4.631716 11.598269  
H 11.692448 -5.080453 7.942220  
H 13.589450 -4.119509 6.688269  
H 10.739804 -5.891261 9.953742  
H 11.784856 -6.219073 11.333771  
H 11.508479 -3.937083 12.164639  
H 9.595234 -6.690583 14.893484  
H 8.269574 -5.698459 14.249462  
H 7.791370 -8.151436 13.970114  
H 7.928299 -7.354370 12.398080  
H 9.273777 -8.330319 13.021807  
H 10.275346 0.693084 11.842341  
H 12.332229 2.095008 12.038676  
H 13.295435 0.768548 11.380446  
H 12.073262 1.555621 10.375152  
H 10.790588 -0.880358 13.725395  
H 11.562474 0.680139 13.978173  
H 12.516193 -0.690931 13.401475  
H 11.203226 -0.667803 9.903030  
H 12.152374 -1.571364 11.074173  
H 9.915816 -2.132579 12.228101  
H 8.019399 -3.172727 11.085276  
H 10.880599 -3.205327 9.734902

1a-C56,  $\Delta G = 2.9192$  kcal/mol, population = 0.27 %

C 14.907928 -6.765195 10.896207  
C 14.914587 -5.623433 11.693475  
C 14.025906 -4.586208 11.433731  
C 13.118618 -4.672010 10.375543  
C 13.122009 -5.819100 9.580749  
C 14.009609 -6.859591 9.837826  
C 12.113127 -3.575135 10.143033  
C 10.891432 -3.680533 11.090026  
C 10.189972 -5.005602 10.839969  
O 10.449417 -5.897206 11.795981  
O 9.508287 -5.217689 9.861151  
C 9.901347 -7.239521 11.636374  
C 8.485678 -7.316336 12.167634  
C 10.198829 1.245935 10.687462  
C 9.566791 2.161324 9.635229  
C 11.714060 1.451640 10.745441  
C 9.823262 -0.208522 10.379760  
C 10.322055 -1.279668 11.365658

N 9.909429 -2.610016 10.904403  
C 9.736277 -1.050488 12.765913  
O 8.735712 -1.881670 13.071406  
O 10.115291 -0.190353 13.527194  
H 15.600021 -7.573250 11.097006  
H 15.613842 -5.540424 12.516215  
H 14.036042 -3.699590 12.057455  
H 12.422939 -5.898975 8.756590  
H 14.000387 -7.742169 9.210379  
H 12.578230 -2.600819 10.299244  
H 11.746673 -3.604756 9.115207  
H 11.232689 -3.660985 12.124540  
H 9.955079 -7.511314 10.583721  
H 10.580963 -7.868120 12.206551  
H 8.129650 -8.345995 12.097966  
H 8.447784 -7.011612 13.214325  
H 7.813929 -6.681957 11.589597  
H 9.781990 1.511942 11.661729  
H 9.959319 1.937780 8.638918  
H 8.481593 2.039950 9.603604  
H 9.783307 3.209177 9.852263  
H 12.171374 0.888833 11.560016  
H 11.951381 2.506070 10.900995  
H 12.183834 1.137563 9.808538  
H 8.735175 -0.293846 10.302702  
H 10.232792 -0.473534 9.399540  
H 11.405781 -1.201237 11.463152  
H 8.700409 -2.506533 12.298688  
H 9.589733 -2.592561 9.943052

1a-C94,  $\Delta G = 2.9512$  kcal/mol, population = 0.26 %

C 14.624849 -7.057082 9.825754  
C 15.049467 -5.817020 10.296093  
C 14.231733 -4.701072 10.157602  
C 12.980195 -4.805781 9.548040  
C 12.566803 -6.051276 9.074048  
C 13.381351 -7.170849 9.212187  
C 12.068748 -3.610023 9.458289  
C 11.300316 -3.340274 10.769183  
C 10.481887 -4.578842 11.124473  
O 11.089239 -5.306454 12.062699  
O 9.436454 -4.874009 10.590399  
C 10.480199 -6.577690 12.433210  
C 9.420589 -6.383087 13.497275

C 10.649459 0.776940 11.265626  
 C 11.341800 1.963352 11.943086  
 C 9.354940 1.226152 10.584466  
 C 10.442401 -0.341720 12.297901  
 C 9.804068 -1.644465 11.792597  
 N 10.402969 -2.207679 10.576492  
 C 8.280091 -1.540149 11.604119  
 O 7.538125 -1.023640 12.408322  
 O 7.831708 -2.120204 10.491132  
 H 15.260966 -7.926618 9.933076  
 H 16.018688 -5.719272 10.769143  
 H 14.567151 -3.738556 10.526313  
 H 11.598135 -6.145934 8.597705  
 H 13.045307 -8.130157 8.838773  
 H 12.646603 -2.711794 9.229115  
 H 11.337039 -3.747001 8.660535  
 H 12.021231 -3.169069 11.574351  
 H 10.073654 -7.040194 11.535612  
 H 11.314776 -7.171290 12.798510  
 H 9.840686 -5.893169 14.376723  
 H 8.591410 -5.784479 13.120661  
 H 9.031181 -7.356644 13.801146  
 H 11.333392 0.413201 10.489543  
 H 12.285672 1.662522 12.402968  
 H 11.553597 2.754480 11.221211  
 H 10.704859 2.383953 12.726099  
 H 8.888697 0.427933 10.004455  
 H 9.556109 2.049260 9.896038  
 H 8.628389 1.572336 11.323158  
 H 11.412935 -0.597303 12.729864  
 H 9.821850 0.031092 13.115752  
 H 9.911520 -2.379977 12.595412  
 H 8.651135 -2.473150 10.050144  
 H 10.864461 -1.490136 10.031853

1a-C70,  $\Delta G = 2.9612$  kcal/mol, population = 0.25 %

C 14.846136 -6.464411 10.074804  
 C 13.584340 -6.989051 9.815007  
 C 12.514483 -6.137027 9.557003  
 C 12.689166 -4.753317 9.556178  
 C 13.960923 -4.236565 9.813850  
 C 15.032367 -5.084041 10.070780  
 C 11.518962 -3.831753 9.331797  
 C 11.009194 -3.185416 10.634414

C 10.666682 -4.260994 11.661924  
 O 9.539709 -4.906951 11.353803  
 O 11.353327 -4.499640 12.629471  
 C 9.093867 -5.965586 12.250452  
 C 9.742644 -7.287994 11.901372  
 C 11.113528 0.411673 11.028875  
 C 11.837016 0.235829 12.365944  
 C 11.238814 1.854588 10.533383  
 C 9.631981 0.021705 11.114981  
 C 9.380376 -1.461823 11.404478  
 N 9.844930 -2.355647 10.335486  
 C 7.885373 -1.717978 11.661873  
 O 7.223701 -1.084364 12.453037  
 O 7.374238 -2.716500 10.943434  
 H 15.680038 -7.125170 10.275421  
 H 13.431220 -8.061039 9.812220  
 H 11.533741 -6.549800 9.355374  
 H 14.112371 -3.163207 9.811635  
 H 16.013084 -4.668556 10.266312  
 H 11.804038 -3.018418 8.659661  
 H 10.692235 -4.371001 8.868453  
 H 11.823878 -2.609109 11.081955  
 H 9.313751 -5.665258 13.273241  
 H 8.016485 -5.994216 12.105990  
 H 10.822819 -7.245306 12.037833  
 H 9.343312 -8.066642 12.554068  
 H 9.527889 -7.564977 10.868469  
 H 11.599328 -0.233425 10.288149  
 H 12.884252 0.531059 12.277021  
 H 11.375961 0.859547 13.136789  
 H 11.819462 -0.796423 12.719617  
 H 10.766820 2.546686 11.236518  
 H 10.757462 1.982689 9.561424  
 H 12.286991 2.142987 10.432652  
 H 9.144022 0.611222 11.893754  
 H 9.134660 0.273735 10.172459  
 H 9.879980 -1.733252 12.337903  
 H 8.145083 -3.055229 10.412512  
 H 9.997651 -1.840069 9.476695

1a-C22,  $\Delta G = 2.9964$  kcal/mol, population = 0.24 %

C 14.920595 -3.109486 9.110337  
 C 13.878904 -3.397140 8.236365  
 C 12.771315 -4.113301 8.683069

C 12.692005 -4.555896 10.003668  
C 13.747361 -4.264700 10.872848  
C 14.852044 -3.546936 10.431520  
C 11.469905 -5.289945 10.497797  
C 10.658934 -4.438567 11.498965  
C 9.421650 -5.214988 11.934581  
O 9.754399 -6.174630 12.803124  
O 8.299425 -5.007893 11.533312  
C 8.691296 -7.036610 13.304173  
C 7.986338 -6.401517 14.484343  
C 11.375682 -0.058484 11.270960  
C 11.878148 -0.597061 9.927811  
C 12.456693 0.802740 11.930816  
C 10.935124 -1.147331 12.262303  
C 9.839243 -2.127871 11.815766  
N 10.268244 -3.180800 10.883386  
C 8.599149 -1.428613 11.242724  
O 8.077498 -2.045049 10.182383  
O 8.108051 -0.429654 11.718147  
H 15.780260 -2.547870 8.767589  
H 13.922150 -3.059774 7.208504  
H 11.958606 -4.328837 7.999641  
H 13.703832 -4.602198 11.901638  
H 15.661165 -3.328889 11.117220  
H 10.826913 -5.548849 9.654863  
H 11.754320 -6.216834 10.996443  
H 11.275812 -4.283363 12.392120  
H 8.002726 -7.249079 12.488233  
H 9.206827 -7.950852 13.588610  
H 7.247365 -7.100134 14.881430  
H 8.696370 -6.166686 15.278485  
H 7.469739 -5.488241 14.189465  
H 10.510790 0.581864 11.075931  
H 11.084624 -1.063925 9.340050  
H 12.275865 0.217799 9.319653  
H 12.682305 -1.324443 10.065886  
H 13.353769 0.209482 12.130281  
H 12.110306 1.217338 12.880031  
H 12.742366 1.633616 11.282624  
H 11.803808 -1.747240 12.552651  
H 10.585037 -0.653104 13.170276  
H 9.466913 -2.624525 12.716046  
H 8.671689 -2.832626 10.044865  
H 11.028716 -2.849023 10.304614



1a-C21,  $\Delta G = 3.0309$  kcal/mol, population = 0.23 %

C 14.885716 -3.267951 9.147859  
C 13.827359 -3.619793 8.318473  
C 12.716761 -4.274938 8.844319  
C 12.651309 -4.592089 10.201223  
C 13.722875 -4.236710 11.025507  
C 14.830681 -3.579649 10.504851  
C 11.427954 -5.260057 10.778155  
C 10.651520 -4.313294 11.719419  
C 9.416878 -5.035845 12.244919  
O 9.758765 -5.918455 13.188630  
O 8.288343 -4.851211 11.850518  
C 8.709989 -6.772136 13.731891  
C 8.483253 -7.983005 12.851341  
C 11.358962 0.036338 11.024985  
C 11.835082 -0.638725 9.735297  
C 12.438200 0.987267 11.551112  
C 10.971431 -0.944561 12.143145  
C 9.865797 -1.970525 11.847332  
N 10.261644 -3.108620 11.004896  
C 8.597280 -1.332509 11.263419  
O 8.044619 -2.038237 10.277558  
O 8.113896 -0.300278 11.671274  
H 15.747924 -2.753861 8.742604  
H 13.860170 -3.379510 7.263299  
H 11.890971 -4.540404 8.194984  
H 13.688977 -4.476277 12.081873  
H 15.652630 -3.311055 11.156508  
H 10.763745 -5.576957 9.972313  
H 11.706897 -6.146701 11.347879  
H 11.290951 -4.089868 12.581300  
H 9.082786 -7.053369 14.713883  
H 7.804683 -6.178515 13.845346  
H 9.406944 -8.549666 12.726616  
H 7.741930 -8.634587 13.317843  
H 8.111533 -7.691317 11.869027  
H 10.474522 0.634410 10.787147  
H 12.193300 0.110822 9.026865  
H 12.661509 -1.327709 9.928359  
H 11.036695 -1.186600 9.230283  
H 12.688933 1.743109 10.804132  
H 13.353197 0.438099 11.791792  
H 12.108040 1.502138 12.455985

H 11.857071 -1.506071 12.458153  
H 10.653601 -0.359845 13.008093  
H 9.537745 -2.375159 12.808670  
H 8.637303 -2.833817 10.188681  
H 11.010869 -2.840908 10.380521

1a-C43,  $\Delta G = 3.0729$  kcal/mol, population = 0.21 %

C 14.151590 -4.471247 8.833473  
C 14.006618 -3.261077 9.504239  
C 13.332094 -3.215420 10.720300  
C 12.790047 -4.371806 11.284619  
C 12.951756 -5.582614 10.606278  
C 13.625466 -5.633560 9.390964  
C 12.013877 -4.305301 12.572009  
C 10.481057 -4.126449 12.359193  
C 9.910038 -5.354959 11.665901  
O 9.934911 -6.414997 12.479568  
O 9.523642 -5.376393 10.520069  
C 9.466895 -7.689424 11.948752  
C 7.961373 -7.807893 12.058483  
C 10.943499 0.809828 11.457947  
C 10.958636 1.708954 10.218702  
C 12.293121 0.858451 12.177793  
C 10.557526 -0.614409 11.042504  
C 10.405349 -1.646294 12.175503  
N 10.083291 -2.949104 11.596189  
C 9.257459 -1.234698 13.104585  
O 8.099153 -1.842703 12.823996  
O 9.356637 -0.417007 13.989393  
H 14.676578 -4.510493 7.887448  
H 14.420608 -2.352912 9.084273  
H 13.238822 -2.271738 11.243087  
H 12.553775 -6.494250 11.035790  
H 13.742986 -6.581361 8.880616  
H 12.160399 -5.212579 13.158212  
H 12.369602 -3.474629 13.181871  
H 10.023150 -4.071084 13.349103  
H 9.805349 -7.780989 10.918143  
H 9.974328 -8.430102 12.562142  
H 7.652740 -8.799081 11.720680  
H 7.637565 -7.682529 13.092531  
H 7.462154 -7.063964 11.437983  
H 10.179794 1.190103 12.141272  
H 11.194001 2.739881 10.490212

H 11.713072 1.370748 9.502408  
H 9.990213 1.704722 9.713541  
H 12.279360 0.299052 13.113946  
H 12.562656 1.889362 12.415731  
H 13.085083 0.445261 11.545852  
H 9.621149 -0.588468 10.477999  
H 11.323473 -1.000091 10.362568  
H 11.313027 -1.661368 12.780432  
H 8.330972 -2.496090 12.114600  
H 10.390844 -3.025227 10.634575

1a-C33,  $\Delta G = 3.1570$  kcal/mol, population = 0.18 %

C 14.215405 -4.831289 8.512016  
C 14.320925 -3.567858 9.082398  
C 13.655431 -3.282670 10.271751  
C 12.872126 -4.248226 10.906554  
C 12.787026 -5.519965 10.330712  
C 13.450302 -5.808793 9.144074  
C 12.112596 -3.908241 12.164596  
C 10.598877 -3.688208 11.923498  
C 9.863786 -4.994615 11.594363  
O 10.152823 -5.953656 12.474929  
O 9.091669 -5.128548 10.670443  
C 9.468015 -7.234374 12.337525  
C 8.112422 -7.200675 13.010703  
C 11.660878 0.029022 10.356475  
C 12.234696 0.331029 11.740900  
C 11.924129 1.187657 9.391041  
C 10.156801 -0.270179 10.396417  
C 9.737781 -1.419684 11.326821  
N 10.309506 -2.689464 10.911041  
C 8.203782 -1.500282 11.308239  
O 7.491013 -0.658478 11.808505  
O 7.699590 -2.556891 10.669974  
H 14.731362 -5.057153 7.587446  
H 14.922428 -2.803752 8.606174  
H 13.756099 -2.301833 10.719708  
H 12.208841 -6.293535 10.819800  
H 13.374077 -6.799639 8.713940  
H 12.229970 -4.695152 12.908653  
H 12.510763 -2.988943 12.594609  
H 10.169805 -3.358689 12.874349  
H 9.388870 -7.471845 11.278314  
H 10.139015 -7.942377 12.817934

H 7.655597 -8.190264 12.949359  
H 8.209746 -6.933355 14.063689  
H 7.448434 -6.486843 12.523422  
H 12.179782 -0.846815 9.955861  
H 12.143640 -0.517520 12.420858  
H 13.295033 0.581206 11.670137  
H 11.718331 1.180808 12.196101  
H 12.994704 1.381042 9.298919  
H 11.446334 2.104363 9.747730  
H 11.532843 0.969784 8.394855  
H 9.621944 0.624410 10.722199  
H 9.809648 -0.497504 9.383782  
H 10.012737 -1.164892 12.355097  
H 8.459754 -3.132232 10.400616  
H 11.058634 -2.594048 10.241225

1a-C53,  $\Delta G = 3.1953$  kcal/mol, population = 0.17 %

C 12.400372 -6.800212 8.827649  
C 13.164159 -6.549811 9.964146  
C 13.360040 -5.243841 10.398123  
C 12.793412 -4.167801 9.710970  
C 12.043180 -4.429322 8.562720  
C 11.844980 -5.735356 8.124829  
C 12.945042 -2.763467 10.235942  
C 11.773959 -2.312806 11.153174  
C 11.765752 -3.225034 12.377605  
O 10.933477 -4.253330 12.225277  
O 12.492994 -3.069181 13.334259  
C 10.950554 -5.300305 13.234391  
C 10.061842 -6.413151 12.734611  
C 8.294296 -2.451250 12.854415  
C 6.841977 -2.273552 12.405237  
C 8.376511 -2.589197 14.375621  
C 9.178086 -1.286850 12.379860  
C 9.489782 -1.312189 10.881097  
N 10.523246 -2.244040 10.403649  
C 9.811868 0.084806 10.317747  
O 10.606188 0.052051 9.241445  
O 9.362345 1.120703 10.747018  
H 12.246315 -7.816630 8.487975  
H 13.608185 -7.371534 10.512071  
H 13.956176 -5.057209 11.283828  
H 11.610988 -3.605074 8.009144  
H 11.259132 -5.920331 7.233038

H 13.868731 -2.674948 10.808966  
H 12.998803 -2.049874 9.413156  
H 12.017454 -1.313934 11.514565  
H 11.981475 -5.626530 13.367976  
H 10.595577 -4.876780 14.173674  
H 10.053342 -7.225772 13.462642  
H 9.037494 -6.064455 12.597741  
H 10.432026 -6.802559 11.785508  
H 8.675954 -3.374507 12.412920  
H 6.409339 -1.372617 12.849273  
H 6.752962 -2.186696 11.320321  
H 6.234961 -3.126722 12.714968  
H 7.770647 -3.426832 14.727478  
H 8.011965 -1.682339 14.866791  
H 9.404754 -2.754250 14.705034  
H 8.677299 -0.343637 12.605920  
H 10.113867 -1.269461 12.943414  
H 8.577924 -1.591842 10.344489  
H 10.147763 -3.167025 10.233338  
H 10.833295 -0.906539 9.134179

1a-C86,  $\Delta G = 3.3051$  kcal/mol, population = 0.14 %

C 14.770240 -2.911444 9.468500  
C 14.620562 -3.178513 10.828006  
C 13.578531 -3.983654 11.270889  
C 12.668235 -4.535246 10.365771  
C 12.836682 -4.274080 9.006402  
C 13.878631 -3.466014 8.558081  
C 11.484423 -5.327827 10.858640  
C 10.477739 -4.417550 11.601149  
C 9.280053 -5.237887 12.086659  
O 9.659288 -6.176545 12.954119  
O 8.134699 -5.060753 11.733624  
C 8.623298 -7.046864 13.493794  
C 9.294022 -8.027416 14.425035  
C 10.581102 -0.478422 9.143507  
C 10.161714 -1.547657 8.130400  
C 11.652226 0.433028 8.536752  
C 11.103982 -1.038338 10.475728  
C 10.168233 -1.950974 11.289896  
N 10.031821 -3.311907 10.772671  
C 8.780866 -1.315174 11.475677  
O 8.615359 -0.179052 11.862557  
O 7.756560 -2.120982 11.197867

H 15.577542 -2.277731 9.124205  
H 15.315286 -2.755875 11.542968  
H 13.465983 -4.179286 12.330911  
H 12.144900 -4.702165 8.290297  
H 13.987371 -3.266919 7.499435  
H 10.978111 -5.804801 10.016512  
H 11.797532 -6.118712 11.539450  
H 10.970796 -4.037661 12.500324  
H 7.890936 -6.425798 14.009616  
H 8.128210 -7.545455 12.660534  
H 9.794568 -7.509322 15.244003  
H 8.541543 -8.693721 14.850034  
H 10.027182 -8.634125 13.892031  
H 9.703633 0.137736 9.363020  
H 10.989838 -2.227367 7.911971  
H 9.310526 -2.136679 8.475743  
H 9.865312 -1.079302 7.189752  
H 11.293231 0.898272 7.616474  
H 12.552419 -0.139312 8.294983  
H 11.936301 1.228269 9.229474  
H 12.029708 -1.593920 10.306222  
H 11.360952 -0.191190 11.113528  
H 10.581737 -2.006351 12.300741  
H 8.153593 -2.997054 10.949004  
H 10.391190 -3.388321 9.834483

1a-C14,  $\Delta G = 3.3095$  kcal/mol, population = 0.14 %

C 14.855920 -3.712338 8.390885  
C 13.715740 -4.005318 7.651522  
C 12.613802 -4.590822 8.270615  
C 12.636583 -4.890812 9.633024  
C 13.790105 -4.596584 10.365365  
C 14.890820 -4.012394 9.751199  
C 11.425113 -5.470662 10.318225  
C 10.735129 -4.421622 11.216533  
C 9.550290 -5.047787 11.945201  
O 9.936399 -6.009396 12.772270  
O 8.389961 -4.707354 11.796052  
C 8.915614 -6.687452 13.568240  
C 8.601246 -5.905634 14.825585  
C 11.182349 0.041152 12.160396  
C 12.249774 1.086849 11.830849  
C 11.388989 -0.508485 13.574515  
C 11.203351 -1.076320 11.106997

C 10.032184 -2.055649 11.162301  
N 10.276708 -3.300473 10.425684  
C 8.712621 -1.459506 10.651823  
O 8.568918 -0.315226 10.284742  
O 7.682233 -2.311774 10.645066  
H 15.713364 -3.256192 7.912556  
H 13.680548 -3.778768 6.593301  
H 11.727728 -4.817923 7.689367  
H 13.825652 -4.827469 11.423733  
H 15.777725 -3.792267 10.332208  
H 10.707048 -5.824019 9.576060  
H 11.706734 -6.319483 10.940308  
H 11.451375 -4.125985 11.997141  
H 8.033979 -6.832233 12.947161  
H 9.362645 -7.652252 13.793878  
H 7.890466 -6.471808 15.430453  
H 9.502930 -5.745264 15.417891  
H 8.154957 -4.939888 14.589059  
H 10.205634 0.529923 12.116496  
H 13.246613 0.635752 11.833700  
H 12.082446 1.524686 10.844339  
H 12.247619 1.895745 12.564755  
H 10.618634 -1.228159 13.858871  
H 11.366450 0.298652 14.309608  
H 12.358974 -1.008055 13.654394  
H 11.239204 -0.638378 10.106265  
H 12.122466 -1.657927 11.233444  
H 9.837148 -2.325860 12.203668  
H 7.978218 -3.212088 10.930139  
H 10.907263 -3.130090 9.652590

1a-C24,  $\Delta G = 3.3139$  kcal/mol, population = 0.14 %

C 14.362820 -4.619711 8.617695  
C 14.428760 -3.367069 9.216950  
C 13.769164 -3.135428 10.421056  
C 13.033194 -4.144666 11.044310  
C 12.985624 -5.404505 10.437833  
C 13.642361 -5.639310 9.235431  
C 12.288157 -3.862666 12.326129  
C 10.754184 -3.782629 12.138403  
C 10.160706 -5.185695 11.960167  
O 9.269325 -5.261394 10.968173  
O 10.457459 -6.114064 12.678919  
C 8.572076 -6.527967 10.777722

C 7.360185 -6.616636 11.680641  
 C 11.535764 -0.148448 10.128854  
 C 12.301962 0.367057 11.347340  
 C 11.589786 0.865729 8.983285  
 C 10.071634 -0.471384 10.454543  
 C 9.853248 -1.539759 11.537473  
 N 10.330059 -2.847120 11.107604  
 C 8.343524 -1.619272 11.810471  
 O 7.728101 -0.773242 12.418459  
 O 7.744078 -2.691482 11.287068  
 H 14.873685 -4.804089 7.681139  
 H 14.993184 -2.569057 8.750998  
 H 13.835425 -2.160987 10.888245  
 H 12.441710 -6.210468 10.913637  
 H 13.595808 -6.621410 8.781580  
 H 12.496476 -4.631067 13.070762  
 H 12.621063 -2.910075 12.738350  
 H 10.333668 -3.448802 13.091497  
 H 8.292773 -6.516620 9.726959  
 H 9.274365 -7.339457 10.957867  
 H 6.820312 -7.541574 11.469389  
 H 7.652219 -6.623171 12.730784  
 H 6.685738 -5.777582 11.505950  
 H 12.027985 -1.059507 9.775611  
 H 12.337936 -0.363522 12.157098  
 H 13.332182 0.609067 11.078791  
 H 11.835015 1.274857 11.739412  
 H 11.119090 1.807952 9.277587  
 H 11.069949 0.491753 8.098570  
 H 12.623026 1.079974 8.703150  
 H 9.572165 0.441092 10.787775  
 H 9.563242 -0.797396 9.541985  
 H 10.318941 -1.210266 12.471246  
 H 8.464751 -3.241770 10.887883  
 H 10.996857 -2.795559 10.350396

1a-C36,  $\Delta G = 3.3471$  kcal/mol, population = 0.13 %

C 14.716493 -2.934891 9.334434  
 C 13.779171 -3.523570 8.494036  
 C 12.765246 -4.316030 9.026773  
 C 12.670702 -4.527319 10.401964  
 C 13.626109 -3.941166 11.236183  
 C 14.640684 -3.152013 10.708803  
 C 11.516170 -5.300028 10.987482



C 10.555269 -4.358746 11.751195  
 C 9.394297 -5.159314 12.344980  
 O 9.832409 -6.027778 13.258863  
 O 8.232699 -5.020833 12.030878  
 C 8.855951 -6.908927 13.887696  
 C 8.607147 -8.136992 13.037804  
 C 10.492814 -0.530157 9.127184  
 C 9.980148 -1.640221 8.204560  
 C 11.539834 0.319423 8.401201  
 C 11.091530 -1.032116 10.450949  
 C 10.204786 -1.911220 11.352137  
 N 10.054404 -3.293997 10.900385  
 C 8.822976 -1.278657 11.582064  
 O 8.665568 -0.126570 11.922062  
 O 7.794331 -2.106555 11.401262  
 H 15.502162 -2.313236 8.924407  
 H 13.830794 -3.363519 7.424501  
 H 12.037575 -4.771473 8.365249  
 H 13.570930 -4.096914 12.307372  
 H 15.371120 -2.702279 11.369621  
 H 10.962324 -5.804463 10.192505  
 H 11.866240 -6.066871 11.677750  
 H 11.103293 -3.938176 12.598784  
 H 9.309795 -7.165399 14.841969  
 H 7.941678 -6.344568 14.061836  
 H 9.537829 -8.674960 12.852637  
 H 7.922915 -8.806432 13.562618  
 H 8.156908 -7.868863 12.081990  
 H 9.646004 0.118552 9.371519  
 H 10.777929 -2.346590 7.959125  
 H 9.148686 -2.195119 8.642128  
 H 9.621277 -1.213644 7.265828  
 H 11.128558 0.746722 7.484428  
 H 12.406741 -0.289538 8.129331  
 H 11.890175 1.140477 9.030442  
 H 12.006894 -1.595802 10.253598  
 H 11.382728 -0.158520 11.036184  
 H 10.669387 -1.920891 12.342169  
 H 8.187122 -2.989055 11.168836  
 H 10.371049 -3.406116 9.950365

1a-C75,  $\Delta G = 3.3641$  kcal/mol, population = 0.13 %

C 14.265929 -4.930462 8.999452  
 C 14.355354 -3.714504 9.667794

C 13.608426 -3.497627 10.822399  
C 12.758691 -4.486092 11.324369  
C 12.686100 -5.708411 10.649286  
C 13.432667 -5.929218 9.497582  
C 11.896500 -4.210298 12.529663  
C 10.466471 -3.756883 12.142764  
C 9.626234 -4.881957 11.526448  
O 9.723435 -6.010977 12.228518  
O 8.924104 -4.752070 10.548172  
C 8.933136 -7.147775 11.775607  
C 9.223781 -8.300096 12.706195  
C 10.789210 0.278398 9.825153  
C 11.156792 -0.786118 8.785857  
C 11.578266 1.564662 9.561622  
C 11.019697 -0.157341 11.281722  
C 10.149545 -1.299018 11.837840  
N 10.450278 -2.603515 11.262353  
C 8.662499 -0.974734 11.613711  
O 8.029112 -1.819382 10.799425  
O 8.103716 -0.026030 12.117816  
H 14.845347 -5.102720 8.101296  
H 15.006984 -2.934620 9.294226  
H 13.693706 -2.552601 11.345818  
H 12.047014 -6.493215 11.033560  
H 13.365584 -6.882737 8.988687  
H 11.824566 -5.092451 13.163790  
H 12.337256 -3.408810 13.123996  
H 9.945404 -3.496838 13.068649  
H 7.881830 -6.860535 11.791220  
H 9.214692 -7.370329 10.746413  
H 8.947067 -8.053742 13.732017  
H 8.644439 -9.170592 12.394267  
H 10.281518 -8.565180 12.680991  
H 9.725408 0.512486 9.708992  
H 11.059310 -0.377717 7.777988  
H 12.194197 -1.110807 8.910279  
H 10.514754 -1.664896 8.843106  
H 11.402770 1.927809 8.547187  
H 12.652042 1.387150 9.672186  
H 11.294572 2.355213 10.259373  
H 12.067395 -0.439604 11.421450  
H 10.842110 0.706765 11.923672  
H 10.294154 -1.311643 12.922627  
H 8.692392 -2.520687 10.560995

H 11.257862 -2.590257 10.656864

1a-C59,  $\Delta G = 3.4337$  kcal/mol, population = 0.11 %

C 13.264998 -5.043739 8.447553  
C 13.016752 -6.102105 9.317817  
C 12.738075 -5.853961 10.656548  
C 12.697248 -4.547073 11.149504  
C 12.965545 -3.495685 10.271365  
C 13.245127 -3.739104 8.929806  
C 12.307273 -4.276570 12.577332  
C 10.768292 -4.110904 12.768554  
C 10.103480 -5.433824 12.418548  
O 9.590222 -5.430613 11.189595  
O 10.114370 -6.396310 13.154090  
C 9.087826 -6.689354 10.660272  
C 8.872898 -6.495236 9.178822  
C 10.777974 0.763498 11.479254  
C 10.519758 1.561118 10.197953  
C 12.229079 0.927762 11.936507  
C 10.405000 -0.704263 11.240804  
C 10.542413 -1.657894 12.442108  
N 10.158691 -3.008158 12.028140  
C 9.602455 -1.214444 13.569201  
O 9.855688 -0.339266 14.363480  
O 8.433666 -1.865963 13.577716  
H 13.481332 -5.235740 7.404275  
H 13.041166 -7.121522 8.953526  
H 12.547641 -6.683521 11.327364  
H 12.969946 -2.477780 10.640904  
H 13.449890 -2.909940 8.264137  
H 12.631578 -5.091110 13.226010  
H 12.791062 -3.369437 12.939990  
H 10.587801 -3.951107 13.832424  
H 9.822608 -7.466297 10.868495  
H 8.164828 -6.935250 11.185814  
H 8.493890 -7.420832 8.742599  
H 8.147637 -5.703375 8.987538  
H 9.812069 -6.240153 8.686216  
H 10.127849 1.162411 12.262241  
H 11.154834 1.201649 9.383149  
H 9.479316 1.472037 9.877471  
H 10.737530 2.620058 10.349657  
H 12.917431 0.483866 11.211105  
H 12.407688 0.459407 12.904930

H 12.481955 1.985693 12.031402  
H 9.375400 -0.763248 10.876630  
H 11.042144 -1.101162 10.444598  
H 11.558609 -1.605036 12.836044  
H 8.534044 -2.560164 12.877107  
H 10.265923 -3.141829 11.030334

1a-C12,  $\Delta G = 3.5285$  kcal/mol, population = 0.10 %

C 14.261934 -4.658155 9.081889  
C 14.194355 -3.380023 9.625677  
C 13.449391 -3.152609 10.779062  
C 12.757124 -4.190600 11.405100  
C 12.845290 -5.473035 10.856268  
C 13.589020 -5.706058 9.705313  
C 11.900818 -3.923147 12.616094  
C 10.395619 -3.763496 12.271370  
C 9.770290 -5.080700 11.809775  
O 9.889867 -6.017462 12.757855  
O 9.220658 -5.251137 10.746838  
C 9.298086 -7.324817 12.500659  
C 10.241894 -8.221922 11.728356  
C 11.249646 -0.384314 9.682151  
C 12.414529 0.551381 9.347474  
C 10.010311 -0.019111 8.861864  
C 11.004243 -0.358071 11.197870  
C 9.976347 -1.351422 11.764516  
N 10.112964 -2.729172 11.289588  
C 8.523911 -0.892212 11.521213  
O 8.105238 0.201036 11.827858  
O 7.752224 -1.828377 10.968837  
H 14.840015 -4.839364 8.184659  
H 14.721524 -2.559034 9.156130  
H 13.415943 -2.158225 11.205071  
H 12.338193 -6.297507 11.339322  
H 13.646333 -6.707218 9.296625  
H 12.001209 -4.727336 13.344716  
H 12.223786 -3.001705 13.102592  
H 9.875113 -3.501963 13.195084  
H 9.095595 -7.718765 13.493766  
H 8.358134 -7.179687 11.971313  
H 10.435474 -7.828054 10.730820  
H 11.189173 -8.337990 12.256819  
H 9.789635 -9.209838 11.622401  
H 11.563291 -1.392859 9.391061

H 13.319068 0.270304 9.891316  
H 12.640100 0.522944 8.279869  
H 12.169488 1.583522 9.612814  
H 9.196476 -0.733031 8.993588  
H 10.253099 -0.000613 7.797584  
H 9.639305 0.970409 9.140195  
H 11.951435 -0.541973 11.708115  
H 10.684555 0.644002 11.492368  
H 10.084397 -1.332040 12.851985  
H 8.379531 -2.595969 10.833763  
H 10.730569 -2.803580 10.491536

1a-C32,  $\Delta G = 3.5793$  kcal/mol, population = 0.09 %

C 14.807336 -2.822638 9.376064  
C 14.697283 -3.149758 10.726156  
C 13.680626 -3.991372 11.159976  
C 12.757119 -4.520762 10.254830  
C 12.885084 -4.198179 8.904113  
C 13.901405 -3.352885 8.465354  
C 11.599728 -5.353970 10.742989  
C 10.599606 -4.490258 11.547507  
C 9.430151 -5.349604 12.031828  
O 9.847336 -6.286007 12.886113  
O 8.279509 -5.203151 11.682801  
C 8.849472 -7.185040 13.453737  
C 8.185076 -6.565756 14.665169  
C 10.588205 -0.441270 9.284958  
C 10.168964 -1.470901 8.230934  
C 11.653277 0.496916 8.710020  
C 11.118067 -1.051635 10.592358  
C 10.201375 -2.026512 11.354360  
N 10.114346 -3.364381 10.769165  
C 8.793156 -1.445200 11.556621  
O 8.587996 -0.332487 11.989650  
O 7.797317 -2.272157 11.239720  
H 15.595034 -2.160947 9.039087  
H 15.402920 -2.745278 11.440959  
H 13.597855 -4.232829 12.213401  
H 12.181290 -4.607610 8.188686  
H 13.979382 -3.106422 7.413992  
H 11.079440 -5.804198 9.894596  
H 11.943263 -6.166008 11.383055  
H 11.112882 -4.135687 12.445785  
H 8.127074 -7.433781 12.678443

H 9.417183 -8.074273 13.717171  
H 7.618323 -5.675803 14.391810  
H 7.495955 -7.288235 15.106750  
H 8.926940 -6.296333 15.418140  
H 9.709127 0.161431 9.532690  
H 11.000355 -2.135123 7.979902  
H 9.323838 -2.080461 8.555042  
H 9.864718 -0.965896 7.312018  
H 11.944396 1.259838 9.435282  
H 11.285467 1.002958 7.815105  
H 12.550263 -0.064706 8.433708  
H 12.056895 -1.578251 10.401302  
H 11.352919 -0.230276 11.270998  
H 10.606987 -2.118981 12.365953  
H 8.223494 -3.122935 10.954915  
H 10.493127 -3.377923 9.835551

1a-C39,  $\Delta G = 3.6327$  kcal/mol, population = 0.08 %

C 13.615771 -5.038587 8.418355  
C 13.664543 -3.694109 8.769681  
C 13.299270 -3.294582 10.052511  
C 12.875223 -4.227758 11.001066  
C 12.846659 -5.577928 10.639602  
C 13.210314 -5.980747 9.360501  
C 12.413003 -3.787388 12.366906  
C 10.871711 -3.651728 12.469630  
C 10.236276 -5.047248 12.426999  
O 9.380966 -5.212808 11.414880  
O 10.494012 -5.901795 13.245988  
C 8.710337 -6.502054 11.289098  
C 9.563088 -7.490773 10.523001  
C 11.574162 0.144184 11.623603  
C 11.705663 0.540940 13.095203  
C 12.046115 1.276269 10.708635  
C 10.139994 -0.256211 11.257209  
C 9.631094 -1.523361 11.956434  
N 10.311866 -2.727965 11.499990  
C 8.113590 -1.656608 11.731866  
O 7.311919 -0.818387 12.080720  
O 7.740187 -2.777296 11.114849  
H 13.899803 -5.352095 7.421818  
H 13.991258 -2.954890 8.049105  
H 13.360867 -2.246891 10.321056  
H 12.543322 -6.318507 11.368589

H 13.180486 -7.031188 9.099446  
H 12.735788 -4.499221 13.126249  
H 12.844399 -2.818280 12.617814  
H 10.650381 -3.287729 13.475757  
H 8.467196 -6.863258 12.286517  
H 7.792735 -6.265226 10.755881  
H 8.986027 -8.401131 10.349869  
H 9.857677 -7.081005 9.556293  
H 10.460184 -7.756470 11.080921  
H 12.226472 -0.716140 11.448506  
H 11.450645 -0.278326 13.769488  
H 12.730572 0.841846 13.320928  
H 11.048406 1.383598 13.327240  
H 11.421122 2.164431 10.837901  
H 11.997466 0.981455 9.658063  
H 13.076927 1.556487 10.934375  
H 9.462422 0.563978 11.502523  
H 10.067362 -0.411232 10.175634  
H 9.752908 -1.409516 13.036519  
H 8.571775 -3.300405 10.976880  
H 10.924067 -2.567106 10.712820

1a-C34,  $\Delta G = 3.6477$  kcal/mol, population = 0.08 %

C 13.166716 -6.162724 8.325008  
C 13.024485 -6.862637 9.518255  
C 12.966915 -6.176393 10.726836  
C 13.048300 -4.783477 10.764801  
C 13.206935 -4.091985 9.561070  
C 13.262191 -4.773788 8.350613  
C 12.923479 -4.053495 12.078293  
C 11.493825 -3.543748 12.378588  
C 10.533181 -4.729727 12.374000  
O 9.725728 -4.749424 11.314980  
O 10.535813 -5.561952 13.254308  
C 8.765732 -5.840185 11.201203  
C 9.386914 -7.051811 10.540418  
C 11.156439 0.529215 11.866702  
C 11.213932 1.796882 12.723629  
C 10.947484 0.882915 10.391987  
C 10.080698 -0.412528 12.427352  
C 9.888541 -1.756780 11.708222  
N 11.120773 -2.503405 11.427859  
C 9.074528 -1.641025 10.407589  
O 9.564211 -2.360196 9.397958

O 8.057203 -0.993158 10.306809  
H 13.210068 -6.694229 7.382731  
H 12.955099 -7.943207 9.509758  
H 12.851263 -6.727747 11.652111  
H 13.291896 -3.012728 9.568623  
H 13.383791 -4.221084 7.427326  
H 13.215981 -4.708038 12.898538  
H 13.590386 -3.188825 12.105154  
H 11.490792 -3.174634 13.410900  
H 8.385440 -6.070161 12.194886  
H 7.966563 -5.418285 10.596362  
H 10.167189 -7.485650 11.164072  
H 8.614118 -7.805895 10.378910  
H 9.819364 -6.787432 9.575197  
H 12.132381 0.038194 11.963112  
H 12.014821 2.458188 12.387117  
H 10.272201 2.348632 12.657921  
H 11.391047 1.557663 13.774406  
H 9.970066 1.346023 10.238568  
H 11.008768 0.009692 9.739976  
H 11.712002 1.587414 10.058958  
H 10.321805 -0.628139 13.470958  
H 9.116046 0.099967 12.427386  
H 9.255141 -2.373351 12.349753  
H 10.368471 -2.801340 9.785864  
H 11.897777 -1.863319 11.320276

1a-C49,  $\Delta G = 3.7713$  kcal/mol, population = 0.06 %

C 13.063876 -5.933938 7.953550  
C 13.237653 -4.560444 8.098884  
C 13.268459 -3.990536 9.367263  
C 13.121727 -4.780044 10.509662  
C 12.961122 -6.158243 10.351704  
C 12.930281 -6.732517 9.085149  
C 13.080656 -4.164424 11.885080  
C 11.667032 -3.694608 12.310085  
C 10.724306 -4.892218 12.263089  
O 9.921718 -4.884455 11.200189  
O 10.751519 -5.766759 13.100949  
C 8.995916 -5.995604 11.031345  
C 7.714649 -5.750878 11.799941  
C 11.129204 0.412206 12.067460  
C 11.159720 1.626166 13.000361  
C 10.839075 0.844708 10.627973



C 10.127132 -0.617127 12.610590  
 C 9.974937 -1.927149 11.821585  
 N 11.231119 -2.594132 11.459732  
 C 9.112381 -1.776461 10.555932  
 O 9.615251 -2.384672 9.482357  
 O 8.051954 -1.193312 10.532459  
 H 13.040193 -6.378550 6.966627  
 H 13.351359 -3.932175 7.224223  
 H 13.409522 -2.921681 9.468918  
 H 12.854968 -6.786026 11.228348  
 H 12.804225 -7.803198 8.982876  
 H 13.425763 -4.881060 12.629820  
 H 13.742723 -3.297560 11.940225  
 H 11.720341 -3.404382 13.365474  
 H 8.821641 -6.028213 9.958654  
 H 9.492819 -6.911308 11.345740  
 H 7.011596 -6.561213 11.598343  
 H 7.900329 -5.717827 12.873488  
 H 7.253077 -4.812007 11.491270  
 H 12.132009 -0.031210 12.092915  
 H 10.189038 2.129503 13.008328  
 H 11.394939 1.332950 14.025751  
 H 11.910068 2.348953 12.673943  
 H 9.832792 1.261466 10.543112  
 H 10.919401 0.018715 9.919242  
 H 11.550074 1.610507 10.312096  
 H 10.420506 -0.878853 13.629975  
 H 9.138083 -0.157999 12.676459  
 H 9.392758 -2.607099 12.447276  
 H 10.455372 -2.803114 9.816045  
 H 11.980472 -1.917091 11.388035

1a-C96,  $\Delta G = 3.7933$  kcal/mol, population = 0.06 %

C 14.279584 -4.348217 9.156947  
 C 13.493433 -5.447334 9.494440  
 C 12.747427 -5.440792 10.667428  
 C 12.772750 -4.336218 11.524495  
 C 13.574302 -3.245132 11.180553  
 C 14.321176 -3.247570 10.005673  
 C 11.911497 -4.290013 12.760847  
 C 10.444578 -3.902839 12.447823  
 C 9.656620 -5.017477 11.746410  
 O 9.885247 -6.209639 12.296699  
 O 8.883101 -4.830858 10.833055

C 9.158514 -7.348082 11.751172  
 C 9.627558 -8.578742 12.488637  
 C 11.457411 -0.020251 10.714793  
 C 12.577968 1.022983 10.745951  
 C 10.323682 0.432699 9.792301  
 C 10.996556 -0.305073 12.152013  
 C 9.972932 -1.434741 12.352786  
 N 10.317990 -2.679628 11.682235  
 C 8.544124 -1.018216 11.949425  
 O 7.929476 -1.877460 11.135797  
 O 7.998626 -0.017805 12.359492  
 H 14.859411 -4.353759 8.242697  
 H 13.463613 -6.312429 8.843775  
 H 12.146075 -6.303349 10.925034  
 H 13.621023 -2.388753 11.842454  
 H 14.934737 -2.390713 9.757072  
 H 11.918618 -5.250291 13.274250  
 H 12.301155 -3.542561 13.452772  
 H 9.931947 -3.766957 13.404290  
 H 8.091890 -7.167825 11.885294  
 H 9.367164 -7.405626 10.682964  
 H 9.098800 -9.452791 12.105084  
 H 10.697523 -8.735180 12.345427  
 H 9.424154 -8.496430 13.557026  
 H 11.890314 -0.934112 10.293025  
 H 12.959219 1.213424 9.740901  
 H 12.212255 1.970264 11.152043  
 H 13.412159 0.690167 11.367480  
 H 9.566553 -0.339715 9.652993  
 H 10.716186 0.681433 8.804274  
 H 9.829074 1.321151 10.192498  
 H 11.872679 -0.555861 12.754472  
 H 10.571261 0.606016 12.578854  
 H 9.904547 -1.607638 13.430794  
 H 8.589885 -2.602115 10.960681  
 H 11.069159 -2.575716 11.014726

1a-C37,  $\Delta G = 3.8542$  kcal/mol, population = 0.06 %

C 14.162642 -4.373055 9.084873  
 C 13.542465 -5.543068 9.514733  
 C 12.767692 -5.539161 10.669373  
 C 12.595647 -4.368892 11.412355  
 C 13.235804 -3.206299 10.979046  
 C 14.011227 -3.204168 9.824084

C 11.713407 -4.347908 12.631493  
 C 10.208374 -4.103735 12.309434  
 C 9.625481 -5.305459 11.579379  
 O 9.498944 -6.349482 12.404101  
 O 9.336078 -5.318209 10.405027  
 C 8.982352 -7.595731 11.850213  
 C 10.076873 -8.410746 11.194455  
 C 11.037593 0.776003 11.398454  
 C 11.130286 1.678135 10.164821  
 C 12.382601 0.721437 12.127111  
 C 10.552665 -0.614739 10.972553  
 C 10.278789 -1.623361 12.104160  
 N 9.914349 -2.912633 11.519756  
 C 9.108223 -1.133611 12.964074  
 O 7.934208 -1.681856 12.630955  
 O 9.206292 -0.307421 13.841188  
 H 14.766134 -4.375105 8.186038  
 H 13.665387 -6.460632 8.952975  
 H 12.298939 -6.456731 11.001242  
 H 13.139446 -2.296520 11.557607  
 H 14.498673 -2.291261 9.505437  
 H 11.783344 -5.289611 13.176648  
 H 12.040912 -3.564898 13.315393  
 H 9.686752 -4.025594 13.265575  
 H 8.564691 -8.108688 12.713110  
 H 8.183151 -7.357327 11.150650  
 H 9.667830 -9.374002 10.883784  
 H 10.470194 -7.908765 10.310938  
 H 10.893716 -8.597535 11.892999  
 H 10.298676 1.206911 12.078643  
 H 10.167143 1.754146 9.655360  
 H 11.445982 2.685444 10.443448  
 H 11.859015 1.284330 9.450350  
 H 12.328112 0.144915 13.051734  
 H 12.717384 1.727273 12.388125  
 H 13.149147 0.271155 11.489655  
 H 9.642128 -0.517452 10.374695  
 H 11.308570 -1.064975 10.321851  
 H 11.148565 -1.682685 12.759482  
 H 8.165066 -2.356468 11.941336  
 H 10.268727 -3.015726 10.576910

1a-C58,  $\Delta G = 3.8768$  kcal/mol, population = 0.05 %

C 14.764545 -3.309162 8.373969

C 13.498811 -3.529798 7.841874  
C 12.520471 -4.159730 8.606312  
C 12.791552 -4.571049 9.912683  
C 14.068483 -4.350921 10.433707  
C 15.048443 -3.726484 9.671937  
C 11.714800 -5.182005 10.771697  
C 11.034862 -4.129117 11.679321  
C 10.083299 -4.860002 12.616004  
O 8.822120 -4.853422 12.187078  
O 10.466535 -5.411481 13.624000  
C 7.828024 -5.574928 12.971412  
C 7.800440 -7.040280 12.592304  
C 11.662510 -0.188781 11.696171  
C 12.844839 -0.996693 11.156586  
C 11.674851 -0.153574 13.226018  
C 10.293184 -0.610208 11.133848  
C 9.746452 -1.987572 11.552908  
N 10.387054 -3.113346 10.859148  
C 8.236644 -2.012421 11.252609  
O 7.433122 -1.301939 11.815194  
O 7.887465 -2.853071 10.281697  
H 15.526600 -2.819640 7.780909  
H 13.271186 -3.214270 6.831399  
H 11.537933 -4.335020 8.184060  
H 14.293105 -4.668201 11.445364  
H 16.033415 -3.563047 10.090908  
H 10.948405 -5.646227 10.148754  
H 12.140129 -5.952217 11.415345  
H 11.800286 -3.699523 12.335389  
H 8.050383 -5.432391 14.027320  
H 6.892816 -5.077013 12.727169  
H 7.002487 -7.540736 13.144166  
H 7.606248 -7.159574 11.525625  
H 8.743963 -7.527697 12.837730  
H 11.794319 0.840767 11.346313  
H 12.818512 -1.082564 10.068079  
H 13.786348 -0.514324 11.426783  
H 12.876648 -2.003604 11.571887  
H 11.611249 -1.157898 13.652025  
H 10.840138 0.431547 13.618508  
H 12.601978 0.293349 13.590428  
H 9.559507 0.132928 11.449863  
H 10.321320 -0.574101 10.039602  
H 9.841799 -2.100730 12.634449

H 8.720716 -3.366829 10.104552  
H 11.043890 -2.781153 10.164387

1a-C88,  $\Delta G = 3.9866$  kcal/mol, population = 0.04 %

C 14.929132 -3.264786 8.687281  
C 13.736034 -3.278604 7.972994  
C 12.614735 -3.914260 8.499354  
C 12.669152 -4.538989 9.746563  
C 13.875082 -4.525199 10.451327  
C 14.996858 -3.894801 9.927439  
C 11.440406 -5.163491 10.355324  
C 10.730546 -4.201467 11.337248  
C 9.569606 -4.934110 11.993248  
O 10.020610 -5.771993 12.931863  
O 8.405288 -4.797481 11.696397  
C 9.039548 -6.579981 13.645265  
C 8.444735 -5.812224 14.807078  
C 11.645701 -0.350856 12.002983  
C 12.820999 -1.182255 11.484002  
C 11.486891 -0.512950 13.516476  
C 10.321805 -0.581643 11.252034  
C 9.641443 -1.952324 11.419781  
N 10.266364 -3.019094 10.625302  
C 8.170403 -1.808211 10.991681  
O 7.861103 -2.461660 9.874654  
O 7.367992 -1.121955 11.585437  
H 15.802017 -2.770895 8.279619  
H 13.676178 -2.796477 7.005314  
H 11.689286 -3.926607 7.935755  
H 13.932297 -5.009147 11.419464  
H 15.924028 -3.893371 10.486733  
H 10.729236 -5.442781 9.576054  
H 11.710842 -6.064896 10.904619  
H 11.436263 -3.949312 12.137505  
H 8.275593 -6.901452 12.939632  
H 9.606562 -7.444417 13.982360  
H 7.768413 -6.465141 15.362140  
H 9.226849 -5.471977 15.487094  
H 7.877739 -4.948957 14.459028  
H 11.888117 0.699961 11.811684  
H 12.917695 -1.120480 10.397748  
H 13.756972 -0.827591 11.920226  
H 12.726724 -2.234513 11.751632  
H 12.393982 -0.192350 14.032649

H 11.309490 -1.555304 13.792847  
H 10.653127 0.081914 13.896038  
H 9.610230 0.171429 11.594177  
H 10.472462 -0.403463 10.181928  
H 9.625061 -2.220078 12.477620  
H 8.667776 -3.015076 9.695563  
H 11.024633 -2.651638 10.064988

1a-C71,  $\Delta G = 3.9966$  kcal/mol, population = 0.04 %

C 14.434228 -7.153101 10.064968  
C 13.278149 -7.224914 9.296091  
C 12.483694 -6.095296 9.123775  
C 12.833652 -4.880773 9.712173  
C 14.000844 -4.816955 10.477208  
C 14.794850 -5.943469 10.654817  
C 11.950407 -3.670403 9.554284  
C 11.186645 -3.293759 10.839327  
C 10.349845 -4.486813 11.298381  
O 10.930960 -5.119880 12.318654  
O 9.303343 -4.815620 10.786504  
C 10.297786 -6.335084 12.817581  
C 10.705377 -7.541496 11.999434  
C 10.711657 0.841893 11.018107  
C 11.460966 2.038827 11.610584  
C 9.446970 1.303755 10.290373  
C 10.439271 -0.182309 12.129415  
C 9.733858 -1.483143 11.719751  
N 10.302791 -2.169511 10.554012  
C 8.217016 -1.321062 11.518587  
O 7.503292 -0.687634 12.262275  
O 7.737027 -1.995342 10.473168  
H 15.052622 -8.031086 10.202755  
H 12.989913 -8.160798 8.834042  
H 11.578834 -6.158495 8.531305  
H 14.289178 -3.878878 10.937271  
H 15.696565 -5.878406 11.250979  
H 12.549117 -2.802008 9.267617  
H 11.217390 -3.841152 8.764611  
H 11.906927 -3.064572 11.630099  
H 10.649659 -6.408406 13.843854  
H 9.219125 -6.188280 12.815296  
H 11.790510 -7.640721 11.967886  
H 10.287148 -8.441003 12.455507  
H 10.334581 -7.468940 10.977856

H 11.380771 0.384872 10.279096  
H 12.382120 1.724021 12.105723  
H 11.722976 2.757854 10.831999  
H 10.840825 2.553970 12.349394  
H 8.943366 0.488676 9.767484  
H 9.695475 2.059966 9.543056  
H 8.733648 1.742261 10.991903  
H 11.392936 -0.456786 12.586939  
H 9.837712 0.285378 12.912105  
H 9.802795 -2.162501 12.574766  
H 8.537829 -2.425656 10.068138  
H 10.768441 -1.514185 9.939004

1a-C48,  $\Delta G = 4.0035$  kcal/mol, population = 0.04 %

C 13.282524 -5.806506 7.925071  
C 13.434246 -4.441643 8.153650  
C 13.306990 -3.929966 9.440563  
C 13.022360 -4.770572 10.519118  
C 12.883067 -6.139201 10.279023  
C 13.010060 -6.655222 8.993304  
C 12.819582 -4.221407 11.909011  
C 11.383396 -3.705870 12.168757  
C 10.375968 -4.797313 11.825490  
O 10.468121 -5.806476 12.697295  
O 9.615846 -4.768140 10.885955  
C 9.608892 -6.964082 12.485627  
C 8.245268 -6.753871 13.109108  
C 11.171990 0.454189 12.136350  
C 11.222077 1.590211 13.162287  
C 11.022357 1.015126 10.720281  
C 10.059615 -0.529546 12.528545  
C 9.888329 -1.778624 11.649392  
N 11.125157 -2.517161 11.368019  
C 9.168952 -1.488180 10.321180  
O 9.732075 -2.066278 9.261247  
O 8.160691 -0.823456 10.236593  
H 13.381946 -6.205356 6.923431  
H 13.654763 -3.774754 7.329420  
H 13.433769 -2.867644 9.606701  
H 12.673438 -6.805940 11.106827  
H 12.898934 -7.719553 8.827302  
H 13.033628 -4.991304 12.648597  
H 13.503836 -3.392050 12.100915  
H 11.293135 -3.508394 13.243588

H 9.540596 -7.152214 11.415670  
H 10.147025 -7.780535 12.961528  
H 7.652664 -7.663593 12.994784  
H 8.336003 -6.536464 14.174207  
H 7.712977 -5.935505 12.624582  
H 12.135429 -0.066580 12.194653  
H 12.043184 2.275885 12.944554  
H 10.291371 2.164070 13.145589  
H 11.361515 1.205207 14.174747  
H 11.097050 0.242835 9.953042  
H 11.808350 1.745399 10.518337  
H 10.058064 1.514279 10.599890  
H 10.245645 -0.870652 13.549880  
H 9.101783 -0.004441 12.542539  
H 9.201084 -2.445406 12.173988  
H 10.500021 -2.572162 9.643609  
H 11.924020 -1.898603 11.428374

1a-C52,  $\Delta G = 4.0117$  kcal/mol, population = 0.04 %

C 15.037665 -6.397105 10.475106  
C 15.073898 -5.352669 11.395464  
C 14.140977 -4.324423 11.320812  
C 13.159022 -4.322750 10.327897  
C 13.135348 -5.370738 9.406597  
C 14.066742 -6.402021 9.478480  
C 12.107086 -3.245611 10.295677  
C 10.963794 -3.494627 11.313266  
C 10.314993 -4.834126 11.007017  
O 10.743496 -5.794074 11.824911  
O 9.533154 -4.996676 10.095504  
C 10.282130 -7.154915 11.574778  
C 8.957219 -7.415447 12.259340  
C 9.226351 -0.041958 9.549558  
C 9.531392 1.000610 8.470188  
C 7.874396 0.241814 10.207518  
C 10.392199 -0.088294 10.547757  
C 10.299572 -1.120126 11.684075  
N 9.912065 -2.478319 11.284627  
C 9.377426 -0.660312 12.830116  
O 8.539003 -1.605386 13.256347  
O 9.429706 0.438067 13.334044  
H 15.763580 -7.198349 10.532603  
H 15.830586 -5.338244 12.170051  
H 14.175026 -3.514188 12.040156



H 12.379458 -5.381004 8.630154  
H 14.034733 -7.207505 8.755397  
H 12.555581 -2.279176 10.529252  
H 11.664596 -3.173075 9.300464  
H 11.379196 -3.533725 12.319444  
H 10.219108 -7.305288 10.498652  
H 11.075858 -7.777511 11.980491  
H 8.675344 -8.459954 12.113022  
H 9.031605 -7.228523 13.331448  
H 8.169593 -6.786892 11.844044  
H 9.161248 -1.011789 9.042342  
H 9.595358 2.000554 8.908048  
H 10.480234 0.789912 7.972133  
H 8.746762 1.015694 7.711318  
H 7.092156 0.315141 9.449573  
H 7.900623 1.185276 10.758041  
H 7.575131 -0.544047 10.902667  
H 11.311972 -0.284705 9.993179  
H 10.507908 0.894180 11.011305  
H 11.285480 -1.168173 12.154156  
H 8.729017 -2.374294 12.648894  
H 9.446856 -2.492044 10.384258

1a-C57,  $\Delta G = 4.0449$  kcal/mol, population = 0.04 %

C 14.935941 -6.570269 10.730618  
C 14.911885 -5.455812 11.566160  
C 13.996930 -4.434460 11.340085  
C 13.091041 -4.509679 10.278962  
C 13.125455 -5.628473 9.447159  
C 14.041836 -6.652198 9.668749  
C 12.062539 -3.427583 10.075325  
C 10.926814 -3.482243 11.123627  
C 10.224393 -4.828203 11.033348  
O 10.519488 -5.614689 12.068008  
O 9.495398 -5.133220 10.115115  
C 9.963398 -6.963797 12.079973  
C 10.825227 -7.919390 11.282519  
C 8.615344 0.412244 9.955143  
C 7.675904 -0.708907 9.500080  
C 8.587823 1.566196 8.948344  
C 10.070687 -0.035118 10.164164  
C 10.348999 -1.074018 11.265614  
N 9.911711 -2.439949 10.944327  
C 9.698700 -0.639234 12.588523

O 8.780500 -1.491838 13.045108  
O 9.979554 0.385677 13.166631  
H 15.648298 -7.366508 10.906122  
H 15.608218 -5.382133 12.392260  
H 13.985513 -3.568994 11.992842  
H 12.425649 -5.701208 8.623208  
H 14.053284 -7.514645 9.014096  
H 12.533389 -2.444835 10.138311  
H 11.613304 -3.513500 9.084266  
H 11.346183 -3.381421 12.123506  
H 9.943130 -7.226381 13.134939  
H 8.944767 -6.921167 11.698704  
H 11.853761 -7.909238 11.644046  
H 10.430360 -8.931464 11.390786  
H 10.826616 -7.661959 10.224136  
H 8.243372 0.798545 10.910241  
H 6.679382 -0.308932 9.303083  
H 8.034696 -1.167084 8.573266  
H 7.566500 -1.492522 10.249941  
H 9.217072 2.395640 9.277601  
H 7.571594 1.942788 8.816683  
H 8.950913 1.234820 7.971184  
H 10.475445 -0.430664 9.227746  
H 10.662171 0.847678 10.411938  
H 11.425050 -1.061066 11.452713  
H 8.794949 -2.232679 12.379303  
H 9.516908 -2.503592 10.014571

1a-C27,  $\Delta G = 4.1353$  kcal/mol, population = 0.03 %

C 14.269366 -4.978836 9.040877  
C 14.375479 -3.765176 9.711288  
C 13.649928 -3.548169 10.879638  
C 12.804494 -4.534859 11.392643  
C 12.715646 -5.754235 10.715185  
C 13.440699 -5.975616 9.550377  
C 11.963167 -4.264394 12.613593  
C 10.526057 -3.810191 12.255273  
C 9.660779 -4.941069 11.682711  
O 9.730681 -6.042764 12.432381  
O 8.957318 -4.827327 10.703237  
C 8.887838 -7.173933 12.059782  
C 9.560009 -8.045173 11.019900  
C 10.763288 0.184907 9.847307  
C 11.149400 -0.895747 8.832252

C 11.528815 1.479400 9.555618  
C 11.001778 -0.214604 11.312800  
C 10.158093 -1.364393 11.894002  
N 10.497548 -2.673568 11.353897  
C 8.665465 -1.079171 11.657049  
O 8.050205 -1.954387 10.861386  
O 8.085224 -0.130627 12.136919  
H 14.832357 -5.150474 8.132238  
H 15.023918 -2.987014 9.328742  
H 13.748418 -2.604854 11.404083  
H 12.079550 -6.536518 11.107189  
H 13.360171 -6.927376 9.040143  
H 11.903490 -5.148799 13.246060  
H 12.413789 -3.465156 13.203118  
H 10.031868 -3.531314 13.190550  
H 8.739624 -7.708230 12.995108  
H 7.932884 -6.789618 11.706673  
H 10.516603 -8.421358 11.384718  
H 8.919388 -8.902170 10.803282  
H 9.723220 -7.498140 10.091512  
H 9.695632 0.398167 9.726035  
H 12.193717 -1.196131 8.960293  
H 10.526189 -1.785603 8.916004  
H 11.039423 -0.514105 7.815272  
H 11.231870 2.279707 10.236811  
H 11.345746 1.817800 8.533913  
H 12.605834 1.323910 9.668222  
H 12.055700 -0.468905 11.458563  
H 10.802790 0.658023 11.936521  
H 10.297740 -1.345291 12.979365  
H 8.719260 -2.654526 10.640685  
H 11.311643 -2.654583 10.757835

1a-C3,  $\Delta G = 4.2376$  kcal/mol, population = 0.03 %

C 13.617067 -3.899116 6.720662  
C 12.227014 -3.924920 6.679884  
C 11.504005 -4.348112 7.792042  
C 12.158623 -4.746982 8.958754  
C 13.554914 -4.720181 8.986860  
C 14.279789 -4.300654 7.877814  
C 11.380466 -5.157930 10.177952  
C 11.232233 -4.009388 11.211394  
C 10.587558 -4.634116 12.444568  
O 11.503904 -5.105858 13.293128

O 9.390578 -4.754665 12.583516  
 C 11.036497 -5.886306 14.434627  
 C 10.617196 -4.997365 15.585090  
 C 9.317481 -1.472767 13.404586  
 C 8.324374 -0.430824 12.882915  
 C 9.512265 -1.308279 14.914212  
 C 10.682873 -1.379755 12.707517  
 C 10.663101 -1.563293 11.187648  
 N 10.464059 -2.912154 10.642540  
 C 11.897766 -0.933655 10.516724  
 O 12.215599 -1.475898 9.338264  
 O 12.509228 0.010771 10.959774  
 H 14.181208 -3.570600 5.857012  
 H 11.703701 -3.616914 5.783356  
 H 10.421581 -4.367780 7.756519  
 H 14.076571 -5.029926 9.885106  
 H 15.361914 -4.287227 7.915353  
 H 10.378906 -5.487734 9.895265  
 H 11.874059 -5.997258 10.671195  
 H 12.226017 -3.650097 11.477652  
 H 10.220606 -6.525730 14.101363  
 H 11.893947 -6.502102 14.695287  
 H 9.742391 -4.403249 15.325611  
 H 10.365937 -5.620513 16.445627  
 H 11.428744 -4.328347 15.874350  
 H 8.897533 -2.464685 13.222490  
 H 8.732857 0.579193 12.982534  
 H 8.066024 -0.587276 11.833910  
 H 7.393879 -0.472966 13.452772  
 H 8.569974 -1.444984 15.448890  
 H 9.887254 -0.307134 15.146402  
 H 10.229786 -2.031514 15.304599  
 H 11.110630 -0.395555 12.909584  
 H 11.372283 -2.102449 13.152941  
 H 9.840999 -0.967211 10.781475  
 H 9.482327 -3.153304 10.592030  
 H 11.612209 -2.247449 9.215911

1a-C47,  $\Delta G = 4.3317$  kcal/mol, population = 0.03 %

C 14.263217 -4.865153 8.728439  
 C 13.469718 -5.896578 9.224959  
 C 12.786585 -5.738577 10.425131  
 C 12.882721 -4.547200 11.150701  
 C 13.691523 -3.525049 10.648379

C 14.375748 -3.679409 9.445734  
C 12.086432 -4.340270 12.413978  
C 10.624159 -3.915404 12.128887  
C 9.774131 -5.048453 11.539924  
O 9.938176 -6.185703 12.218193  
O 9.018617 -4.915444 10.602813  
C 9.136962 -7.338091 11.823129  
C 7.774282 -7.304620 12.481788  
C 10.730779 0.194383 9.920570  
C 11.075530 -0.838559 8.842501  
C 11.500374 1.495127 9.669041  
C 11.007548 -0.277592 11.357484  
C 10.191007 -1.465482 11.896791  
N 10.525809 -2.742787 11.280973  
C 8.688825 -1.187716 11.717963  
O 8.059327 -2.039336 10.907915  
O 8.113710 -0.266191 12.253507  
H 14.794109 -4.988799 7.793050  
H 13.385269 -6.826883 8.677199  
H 12.178895 -6.549077 10.807186  
H 13.794149 -2.602815 11.207843  
H 14.996555 -2.874342 9.073093  
H 12.075982 -5.246539 13.017319  
H 12.540767 -3.548770 13.011468  
H 10.156249 -3.692170 13.092150  
H 9.062580 -7.351586 10.737414  
H 9.723928 -8.191005 12.155582  
H 7.195302 -6.444905 12.144700  
H 7.225293 -8.211171 12.219957  
H 7.870166 -7.264137 13.567589  
H 9.662455 0.423423 9.840504  
H 12.116113 -1.164981 8.931624  
H 10.435769 -1.719460 8.891290  
H 10.952710 -0.401861 7.849389  
H 11.287045 1.885704 8.672128  
H 12.578792 1.325345 9.737625  
H 11.233608 2.262685 10.398490  
H 12.067198 -0.527317 11.465856  
H 10.815192 0.560183 12.029308  
H 10.359755 -1.503550 12.977380  
H 8.734271 -2.717562 10.638845  
H 11.305425 -2.681414 10.642908

1a-C69,  $\Delta G = 4.4064$  kcal/mol, population = 0.02 %

C 14.633905 -7.071004 9.856810  
C 14.994253 -5.727609 9.925617  
C 14.062561 -4.739307 9.628383  
C 12.758349 -5.075725 9.261502  
C 12.409766 -6.424328 9.187803  
C 13.338758 -7.416892 9.484056  
C 11.737684 -4.002718 8.991243  
C 11.159836 -3.336616 10.263567  
C 10.467993 -4.387612 11.125512  
O 11.322417 -5.015251 11.917964  
O 9.274855 -4.632121 11.076653  
C 10.823796 -6.111340 12.743187  
C 10.266402 -5.590962 14.050739  
C 10.198661 0.650417 12.329234  
C 10.723301 2.080499 12.183088  
C 10.890053 -0.057465 13.497940  
C 10.386777 -0.112209 11.008795  
C 9.682271 -1.466024 10.930106  
N 10.181817 -2.344188 9.867769  
C 8.159102 -1.351306 10.763207  
O 7.523939 -2.519656 10.614157  
O 7.540460 -0.311665 10.772124  
H 15.358706 -7.841557 10.087453  
H 16.002159 -5.450119 10.208290  
H 14.349986 -3.695561 9.684047  
H 11.400845 -6.700096 8.903613  
H 13.051066 -8.459109 9.422720  
H 12.188320 -3.202588 8.399280  
H 10.903576 -4.405349 8.414847  
H 11.990725 -2.926934 10.852169  
H 10.078749 -6.662092 12.172713  
H 11.698790 -6.738163 12.895553  
H 9.970752 -6.435011 14.676676  
H 11.018385 -5.012588 14.588886  
H 9.389976 -4.965056 13.883581  
H 9.127479 0.703421 12.539310  
H 11.790874 2.078111 11.943256  
H 10.201263 2.612549 11.384683  
H 10.590625 2.644899 13.108671  
H 10.508138 -1.067491 13.659063  
H 10.742241 0.497250 14.426792  
H 11.966784 -0.131981 13.319239  
H 10.044207 0.505835 10.175097  
H 11.456677 -0.289294 10.858962

H 9.821519 -1.991956 11.878554  
H 8.173031 -3.263232 10.584667  
H 10.508112 -1.804560 9.076405

1a-C17,  $\Delta G = 4.4277$  kcal/mol, population = 0.02 %

C 13.790794 -4.989243 8.791860  
C 13.368733 -6.053103 9.584197  
C 12.838364 -5.815534 10.846985  
C 12.716426 -4.514020 11.338847  
C 13.157864 -3.456112 10.541116  
C 13.688846 -3.688798 9.276274  
C 12.077790 -4.254185 12.676090  
C 10.534445 -4.070730 12.592634  
C 9.896955 -5.390874 12.172784  
O 9.368267 -5.350225 10.950595  
O 9.907227 -6.370786 12.885385  
C 8.736463 -6.560146 10.436960  
C 9.746188 -7.479706 9.784308  
C 10.833075 0.806644 11.373000  
C 10.856987 1.613189 10.071598  
C 12.159322 0.949349 12.122724  
C 10.499372 -0.654849 11.051659  
C 10.383661 -1.617863 12.247804  
N 10.079269 -2.963010 11.757116  
C 9.239214 -1.173115 13.166849  
O 9.331041 -0.297876 13.995566  
O 8.092446 -1.825261 12.944517  
H 14.204124 -5.173067 7.808244  
H 13.453393 -7.068966 9.219174  
H 12.516165 -6.648065 11.460171  
H 13.101786 -2.442746 10.918623  
H 14.026427 -2.855553 8.672696  
H 12.272156 -5.078895 13.362178  
H 12.499487 -3.356358 13.128639  
H 10.179824 -3.892997 13.610122  
H 8.213901 -7.049999 11.256440  
H 8.011259 -6.187639 9.717322  
H 9.219009 -8.319380 9.327213  
H 10.301960 -6.956793 9.005673  
H 10.451969 -7.874699 10.513718  
H 10.039645 1.211086 12.006747  
H 11.643453 1.248709 9.404424  
H 9.905119 1.539719 9.540791  
H 11.051456 2.668442 10.272739

H 12.978879 0.503705 11.551033  
H 12.128213 0.470059 13.101743  
H 12.397534 2.003257 12.279868  
H 9.562757 -0.697915 10.488424  
H 11.278304 -1.053476 10.394509  
H 11.300057 -1.578305 12.838797  
H 8.331682 -2.518505 12.276017  
H 10.371373 -3.088489 10.796038

1a-C15,  $\Delta G = 4.4277$  kcal/mol, population = 0.02 %

C 14.279685 -4.852967 8.949756  
C 14.095559 -3.522756 9.311239  
C 13.407420 -3.206533 10.478761  
C 12.885366 -4.208179 11.299353  
C 13.090310 -5.541551 10.931944  
C 13.780182 -5.862477 9.768735  
C 12.076046 -3.867136 12.523759  
C 10.548259 -3.793503 12.241857  
C 10.042158 -5.124345 11.698043  
O 10.169957 -6.086540 12.618758  
O 9.608541 -5.295034 10.582918  
C 9.761454 -7.436014 12.250859  
C 8.275980 -7.635164 12.466119  
C 11.134502 -0.323612 9.707801  
C 12.266884 0.611106 9.273574  
C 9.810769 0.097793 9.066380  
C 11.078592 -0.365673 11.241814  
C 10.104152 -1.366939 11.883808  
N 10.144978 -2.726362 11.337120  
C 8.645805 -0.865916 11.845665  
O 7.784284 -1.761453 11.363512  
O 8.300487 0.223162 12.243840  
H 14.815685 -5.102339 8.042789  
H 14.490591 -2.729217 8.689336  
H 13.290373 -2.169354 10.762164  
H 12.711822 -6.333759 11.566096  
H 13.930108 -6.901276 9.502227  
H 12.238204 -4.610010 13.304503  
H 12.381618 -2.900455 12.926408  
H 10.043817 -3.632418 13.196110  
H 10.047252 -7.614186 11.215681  
H 10.351118 -8.075852 12.903197  
H 8.016254 -8.672886 12.248066  
H 8.003079 -7.424503 13.501013



H 7.693071 -6.991142 11.807824  
H 11.387780 -1.321802 9.333397  
H 12.356703 0.633268 8.185989  
H 12.077510 1.631797 9.617143  
H 13.226867 0.291330 9.684944  
H 9.493467 1.075137 9.438103  
H 9.007317 -0.613428 9.260952  
H 9.922122 0.169235 7.982731  
H 12.076754 -0.585742 11.625020  
H 10.818121 0.626121 11.617848  
H 10.344898 -1.401075 12.949506  
H 8.369698 -2.534582 11.120513  
H 10.650551 -2.779372 10.461793

1a-C61,  $\Delta G = 4.4321$  kcal/mol, population = 0.02 %

C 14.785147 -3.080359 8.288009  
C 15.090976 -3.595972 9.545013  
C 14.134921 -4.309616 10.256974  
C 12.860184 -4.521971 9.726745  
C 12.567414 -4.011201 8.461037  
C 13.522238 -3.292735 7.746162  
C 11.809615 -5.233118 10.539858  
C 11.129911 -4.284022 11.555173  
C 10.233245 -5.117297 12.460924  
O 8.939053 -5.012812 12.169964  
O 10.681676 -5.820065 13.340098  
C 8.006127 -5.784537 12.981467  
C 6.611684 -5.461044 12.502480  
C 11.633742 -0.313654 11.846190  
C 12.815646 -1.038588 11.199202  
C 11.716868 -0.383938 13.372817  
C 10.254960 -0.749108 11.316861  
C 9.782891 -2.175566 11.652121  
N 10.433676 -3.217734 10.844625  
C 8.265890 -2.234858 11.404193  
O 7.917372 -2.955037 10.340468  
O 7.454456 -1.640253 12.078762  
H 15.528374 -2.521238 7.733877  
H 16.074183 -3.439991 9.970969  
H 14.376507 -4.702955 11.237638  
H 11.586495 -4.177358 8.031506  
H 13.278205 -2.901097 6.766621  
H 11.039863 -5.650052 9.888214  
H 12.259524 -6.052505 11.100274

H 11.908361 -3.890221 12.219932  
H 8.248404 -6.840696 12.863939  
H 8.156123 -5.509267 14.025252  
H 6.487116 -5.727755 11.452635  
H 5.890432 -6.030737 13.090795  
H 6.394085 -4.399619 12.620804  
H 11.712149 0.741809 11.564277  
H 12.747529 -1.040287 10.109029  
H 13.753846 -0.550530 11.470551  
H 12.891056 -2.073391 11.531620  
H 11.720669 -1.417059 13.729124  
H 10.875550 0.130591 13.842425  
H 12.638602 0.082100 13.726854  
H 9.510049 -0.063219 11.723621  
H 10.227375 -0.628044 10.228797  
H 9.927765 -2.365246 12.716821  
H 8.759725 -3.416112 10.083204  
H 11.069607 -2.806590 10.172849

1a-C85,  $\Delta G = 4.5036$  kcal/mol, population = 0.02 %

C 15.172069 -6.480861 10.702250  
C 14.224828 -6.628469 9.693983  
C 13.287867 -5.625381 9.464014  
C 13.283351 -4.463423 10.236741  
C 14.240812 -4.323558 11.243885  
C 15.178990 -5.322878 11.475991  
C 12.226746 -3.408364 10.039422  
C 11.081745 -3.521159 11.075396  
C 10.410028 -4.876195 10.922122  
O 10.753180 -5.718092 11.896459  
O 9.677198 -5.148361 9.996479  
C 10.233666 -7.079519 11.829149  
C 8.850123 -7.166267 12.438097  
C 8.661090 0.351903 10.065249  
C 7.756662 -0.772969 9.552340  
C 8.588715 1.558638 9.124478  
C 10.132215 -0.056387 10.241184  
C 10.457033 -1.130711 11.295009  
N 10.048469 -2.492930 10.926658  
C 9.816921 -0.764104 12.643338  
O 10.086798 0.240748 13.260569  
O 8.919532 -1.651388 13.074736  
H 15.901832 -7.260099 10.882481  
H 14.215436 -7.523429 9.084339

H 12.550921 -5.746780 8.678889  
H 14.250888 -3.424456 11.849558  
H 15.916633 -5.198051 12.258963  
H 12.667918 -2.414569 10.129716  
H 11.789720 -3.485873 9.042185  
H 11.493781 -3.452071 12.081328  
H 10.240776 -7.399891 10.788870  
H 10.958400 -7.662979 12.391625  
H 8.521701 -8.207380 12.439098  
H 8.858086 -6.809392 13.468861  
H 8.130795 -6.580769 11.865934  
H 8.282007 0.672356 11.041806  
H 7.671477 -1.596322 10.261648  
H 6.748402 -0.394276 9.374293  
H 8.129790 -1.172682 8.604487  
H 8.958918 1.295377 8.129413  
H 9.189896 2.390372 9.497687  
H 7.559390 1.906104 9.016460  
H 10.539646 -0.396817 9.284419  
H 10.697519 0.833701 10.521723  
H 11.535335 -1.094538 11.464979  
H 8.938130 -2.363447 12.378736  
H 9.655237 -2.534421 9.995042

1a-C98,  $\Delta G = 4.5827$  kcal/mol, population = 0.02 %

C 13.089462 -5.348105 7.777127  
C 13.310080 -4.036841 8.189498  
C 13.247384 -3.708965 9.539557  
C 12.959012 -4.682068 10.499336  
C 12.750991 -5.996063 10.074615  
C 12.813918 -6.328429 8.725046  
C 12.822383 -4.324407 11.957517  
C 11.409752 -3.813944 12.334786  
C 10.362251 -4.832763 11.907803  
O 10.476648 -5.949361 12.633975  
O 9.551626 -4.667785 11.026315  
C 9.575020 -7.051678 12.325348  
C 8.249597 -6.891691 13.039662  
C 10.566732 0.709704 12.015479  
C 11.936439 0.534370 11.351300  
C 10.579343 1.929459 12.941313  
C 10.087462 -0.516346 12.809965  
C 9.906969 -1.842456 12.046744  
N 11.163406 -2.524578 11.699373

C 9.081937 -1.622811 10.770235  
O 7.959828 -1.166910 10.772894  
O 9.717611 -1.946373 9.645825  
H 13.138185 -5.604128 6.726267  
H 13.533841 -3.268710 7.459701  
H 13.427903 -2.687442 9.849583  
H 12.537431 -6.765405 10.806856  
H 12.649964 -7.353086 8.415348  
H 13.038991 -5.191391 12.579642  
H 13.535386 -3.543801 12.231419  
H 11.362307 -3.745704 13.428606  
H 9.449235 -7.102936 11.245304  
H 10.112266 -7.932966 12.667809  
H 7.628116 -7.768095 12.845901  
H 8.398030 -6.809247 14.117205  
H 7.716412 -6.009316 12.686485  
H 9.833674 0.901743 11.225257  
H 11.926555 -0.224749 10.568314  
H 12.250871 1.469120 10.883158  
H 12.700181 0.265346 12.087745  
H 9.599225 2.094055 13.393789  
H 10.854842 2.831824 12.391982  
H 11.304704 1.794192 13.748754  
H 10.772540 -0.708307 13.641936  
H 9.121338 -0.269896 13.253283  
H 9.304765 -2.496968 12.678337  
H 10.556123 -2.378483 9.962376  
H 11.953716 -1.923292 11.886894

1a-C31,  $\Delta G = 4.5927$  kcal/mol, population = 0.02 %

C 14.838120 -6.536268 10.987189  
C 14.096949 -6.385603 9.820365  
C 13.215741 -5.317012 9.686379  
C 13.065975 -4.382711 10.710877  
C 13.819377 -4.539762 11.877077  
C 14.697516 -5.607964 12.016416  
C 12.078330 -3.252150 10.580894  
C 10.817044 -3.442641 11.457600  
C 10.161570 -4.772070 11.116935  
O 10.372012 -5.687630 12.061233  
O 9.536427 -4.957983 10.095630  
C 9.870995 -7.038189 11.827555  
C 10.850886 -7.847786 11.005600  
C 9.514480 -0.020339 9.357763

C 10.039873 0.953960 8.299643  
 C 8.087703 0.348675 9.769896  
 C 10.497486 -0.062330 10.536233  
 C 10.174217 -1.040233 11.678125  
 N 9.803190 -2.401944 11.273839  
 C 9.093931 -0.498813 12.634905  
 O 8.174775 -1.403974 12.972641  
 O 9.094135 0.625053 13.081857  
 H 15.522580 -7.368245 11.094648  
 H 14.199896 -7.102067 9.015004  
 H 12.634595 -5.209232 8.778385  
 H 13.718207 -3.819602 12.680832  
 H 15.274752 -5.715375 12.926354  
 H 12.547624 -2.310991 10.872008  
 H 11.757751 -3.153230 9.542255  
 H 11.101991 -3.460569 12.508542  
 H 9.751393 -7.446807 12.828068  
 H 8.896810 -6.968157 11.347044  
 H 11.836509 -7.853117 11.471713  
 H 10.494679 -8.877372 10.934945  
 H 10.947502 -7.446473 9.997704  
 H 9.488311 -1.011341 8.889382  
 H 10.079459 1.971444 8.698426  
 H 11.045947 0.680923 7.973951  
 H 9.390051 0.962371 7.422469  
 H 7.643684 -0.386419 10.443043  
 H 7.443214 0.410203 8.890830  
 H 8.067692 1.318653 10.272356  
 H 11.486380 -0.314855 10.149376  
 H 10.576599 0.934663 10.975421  
 H 11.063767 -1.104445 12.310523  
 H 8.438044 -2.209378 12.445380  
 H 9.452221 -2.432312 10.323180

1a-C6,  $\Delta G = 4.6116$  kcal/mol, population = 0.02 %

C 12.881744 -6.130006 7.885250  
 C 13.125627 -6.504293 9.203317  
 C 13.180372 -5.539061 10.202900  
 C 12.990167 -4.187431 9.906004  
 C 12.757075 -3.822372 8.578013  
 C 12.700357 -4.785295 7.575332  
 C 13.000773 -3.159009 11.006772  
 C 11.589575 -2.823745 11.565837  
 C 10.968062 -4.104985 12.112088

O 11.532045 -4.460853 13.268981  
 O 10.122269 -4.747042 11.532384  
 C 11.132805 -5.736142 13.854809  
 C 9.854820 -5.603632 14.654784  
 C 7.769123 -2.451041 11.982876  
 C 6.717271 -1.861327 11.039762  
 C 7.129149 -2.841132 13.317331  
 C 8.927906 -1.476015 12.235717  
 C 9.791112 -1.168809 11.009654  
 N 10.755640 -2.183730 10.554974  
 C 10.539516 0.171135 11.139589  
 O 10.149054 1.121669 11.774775  
 O 11.665455 0.219773 10.417505  
 H 12.840074 -6.879297 7.104789  
 H 13.277172 -7.547091 9.452945  
 H 13.376827 -5.837565 11.226090  
 H 12.619920 -2.778008 8.327289  
 H 12.519545 -4.484537 6.550810  
 H 13.613232 -3.510269 11.837412  
 H 13.435915 -2.223919 10.652670  
 H 11.734798 -2.133407 12.396510  
 H 11.032990 -6.465698 13.052788  
 H 11.976018 -6.006618 14.485778  
 H 9.641500 -6.553038 15.149741  
 H 9.954662 -4.833832 15.421257  
 H 9.011957 -5.356398 14.011009  
 H 8.173159 -3.357056 11.525931  
 H 7.122492 -1.629180 10.052796  
 H 5.896338 -2.566333 10.892964  
 H 6.298308 -0.940311 11.455579  
 H 7.863446 -3.281085 13.994599  
 H 6.326946 -3.567429 13.170689  
 H 6.700745 -1.964313 13.811835  
 H 8.520683 -0.530272 12.599449  
 H 9.561405 -1.857269 13.040814  
 H 9.129331 -0.998478 10.155396  
 H 10.312804 -2.879359 9.968100  
 H 11.744730 -0.689028 10.030833

1a-C2,  $\Delta G = 4.6172$  kcal/mol, population = 0.02 %

C 12.446934 -6.317482 7.918123  
 C 12.711174 -6.684534 9.234221  
 C 12.892885 -5.707629 10.207154  
 C 12.811555 -4.351193 9.885676

C 12.560773 -3.994514 8.558355  
C 12.375408 -4.968567 7.582593  
C 12.967582 -3.302019 10.955796  
C 11.625709 -2.786256 11.542687  
C 10.894216 -3.946177 12.210659  
O 11.368234 -4.177458 13.438509  
O 10.023155 -4.593522 11.676350  
C 10.806749 -5.300458 14.181308  
C 11.476446 -6.604924 13.804600  
C 7.830797 -2.193208 11.994873  
C 6.756303 -1.484318 11.166365  
C 7.263504 -2.636965 13.344613  
C 9.059718 -1.297804 12.214669  
C 9.904957 -1.060659 10.960488  
N 10.819683 -2.128172 10.520552  
C 10.707903 0.252397 11.030209  
O 10.358880 1.242317 11.628552  
O 11.829107 0.226589 10.300882  
H 12.305997 -7.076073 7.158552  
H 12.779008 -7.731249 9.503479  
H 13.104584 -6.001891 11.227741  
H 12.512275 -2.947692 8.286691  
H 12.181782 -4.673690 6.558711  
H 13.562251 -3.696360 11.780468  
H 13.495061 -2.432779 10.560760  
H 11.878313 -2.058368 12.313265  
H 10.988866 -5.041164 15.221355  
H 9.733826 -5.330439 13.999347  
H 11.093629 -7.402144 14.444604  
H 11.269702 -6.870393 12.768406  
H 12.556116 -6.541797 13.947274  
H 8.148325 -3.088517 11.455419  
H 6.403285 -0.585556 11.680214  
H 7.120539 -1.184138 10.181484  
H 5.897588 -2.139992 11.007865  
H 6.954798 -1.771681 13.938541  
H 8.004993 -3.192230 13.923038  
H 6.390768 -3.279554 13.210853  
H 8.728300 -0.325210 12.583555  
H 9.690637 -1.715283 13.003263  
H 9.229752 -0.893651 10.116153  
H 10.343083 -2.812896 9.947458  
H 11.867950 -0.699862 9.950306

1a-C91,  $\Delta G = 4.7320$  kcal/mol, population = 0.01 %

C 15.203027 -6.085283 9.768413  
C 13.981962 -6.352632 9.157512  
C 12.935412 -5.441069 9.260372  
C 13.093667 -4.250537 9.971610  
C 14.324177 -3.991134 10.579428  
C 15.371562 -4.900071 10.479931  
C 11.943598 -3.290877 10.132288  
C 11.247196 -3.433605 11.505865  
C 10.824045 -4.876332 11.745249  
O 9.861281 -5.233873 10.887615  
O 11.301284 -5.602106 12.585859  
C 9.321556 -6.583422 10.988639  
C 8.225291 -6.654322 12.030445  
C 8.534944 -0.657519 9.844555  
C 8.361345 0.154909 8.558185  
C 7.377233 -0.392097 10.809323  
C 9.914025 -0.355046 10.447912  
C 10.302957 -1.131294 11.716425  
N 10.066239 -2.580687 11.673113  
C 9.645301 -0.560040 12.987497  
O 9.621719 0.618227 13.259184  
O 9.141455 -1.491782 13.798010  
H 16.018426 -6.793132 9.689076  
H 13.843387 -7.270094 8.599108  
H 11.985546 -5.655331 8.785132  
H 14.463303 -3.068897 11.131925  
H 16.320375 -4.682458 10.954387  
H 12.298834 -2.263321 10.041401  
H 11.200452 -3.454908 9.350665  
H 11.954288 -3.191702 12.298312  
H 8.942680 -6.789959 9.990569  
H 10.139966 -7.265106 11.212805  
H 7.430371 -5.942119 11.805187  
H 7.795166 -7.657674 12.033497  
H 8.614906 -6.446508 13.026942  
H 8.503180 -1.715027 9.556740  
H 7.411640 -0.080573 8.074135  
H 8.371487 1.226571 8.775461  
H 9.164373 -0.051798 7.847441  
H 7.387293 0.645607 11.150980  
H 7.408918 -1.035153 11.690340  
H 6.422019 -0.574785 10.313346  
H 10.672058 -0.555393 9.688506



H 9.978152 0.709384 10.684370  
H 11.370415 -0.964870 11.884593  
H 9.304066 -2.343473 13.305957  
H 9.368451 -2.823281 10.979480

1a-C65,  $\Delta G = 4.7402$  kcal/mol, population = 0.01 %

C 14.777442 -3.569203 8.586248  
C 14.780349 -3.762189 9.966335  
C 13.687700 -4.350279 10.590578  
C 12.573961 -4.755219 9.849726  
C 12.583983 -4.563899 8.467972  
C 13.677988 -3.974401 7.838294  
C 11.363204 -5.322521 10.546863  
C 10.619334 -4.223929 11.335939  
C 9.450479 -4.824135 12.113039  
O 9.858362 -5.698279 13.022905  
O 8.282282 -4.533820 11.931166  
C 8.839521 -6.355056 13.835442  
C 9.550662 -7.295263 14.777419  
C 11.716621 -0.140438 11.909669  
C 12.396371 -1.088157 12.901691  
C 10.676970 0.740420 12.606610  
C 11.141824 -0.893447 10.696602  
C 9.974589 -1.852045 11.003885  
N 10.127710 -3.196620 10.444065  
C 8.604877 -1.295538 10.578490  
O 8.401214 -0.147850 10.253565  
O 7.601912 -2.177108 10.628501  
H 15.627553 -3.107978 8.099812  
H 15.635146 -3.453892 10.555231  
H 13.696991 -4.494518 11.664663  
H 11.730528 -4.879142 7.878883  
H 13.667885 -3.831654 6.765015  
H 10.678003 -5.761785 9.819189  
H 11.653472 -6.106696 11.244990  
H 11.316392 -3.829670 12.086710  
H 8.280319 -5.584438 14.365496  
H 8.158668 -6.880123 13.165971  
H 10.233755 -6.751671 15.431148  
H 8.813980 -7.805933 15.399624  
H 10.114710 -8.048387 14.225906  
H 12.492405 0.520327 11.508875  
H 11.677147 -1.762943 13.374381  
H 13.154879 -1.699460 12.407882

H 12.881719 -0.526238 13.702422  
H 11.142038 1.322412 13.405233  
H 9.883274 0.141191 13.061407  
H 10.208449 1.431218 11.904507  
H 10.817002 -0.169996 9.948092  
H 11.947069 -1.481361 10.250823  
H 9.880249 -1.966846 12.087959  
H 7.940337 -3.066425 10.898069  
H 10.674708 -3.163723 9.594969

1a-C99,  $\Delta G = 4.7440$  kcal/mol, population = 0.01 %

C 14.690135 -6.481502 10.714605  
C 13.764026 -6.589840 9.683163  
C 12.835085 -5.575677 9.470274  
C 12.819768 -4.440375 10.280200  
C 13.758467 -4.338214 11.310182  
C 14.685791 -5.350234 11.527669  
C 11.776012 -3.370567 10.086061  
C 10.697675 -3.394502 11.193869  
C 10.000216 -4.746874 11.179761  
O 10.330489 -5.490104 12.235327  
O 9.244128 -5.090213 10.297819  
C 9.794290 -6.845305 12.309536  
C 10.639979 -7.809324 11.504939  
C 9.684675 0.432536 9.208176  
C 8.825551 1.590805 8.693283  
C 9.666925 -0.727582 8.210786  
C 9.216281 0.048459 10.620192  
C 10.078025 -0.993715 11.358868  
N 9.660869 -2.365671 11.062188  
C 9.921379 -0.762078 12.869666  
O 10.459104 0.138397 13.470795  
O 9.095762 -1.625627 13.467619  
H 15.412114 -7.270326 10.884147  
H 13.759725 -7.465437 9.046134  
H 12.110030 -5.668891 8.670641  
H 13.763149 -3.460243 11.946053  
H 15.407500 -5.256150 12.329552  
H 12.243337 -2.384524 10.084541  
H 11.281128 -3.505594 9.123587  
H 11.177711 -3.269992 12.163957  
H 9.820697 -7.076476 13.371616  
H 8.760616 -6.828351 11.968759  
H 11.683586 -7.761313 11.816922

H 10.275896 -8.825907 11.665581  
H 10.586035 -7.588125 10.439788  
H 10.717123 0.788934 9.294791  
H 7.781159 1.281901 8.592647  
H 8.859607 2.444600 9.373354  
H 9.171073 1.924414 7.712866  
H 10.379298 -1.508684 8.472460  
H 9.931842 -0.373289 7.212668  
H 8.670611 -1.175687 8.147175  
H 9.208090 0.957442 11.223623  
H 8.183490 -0.314919 10.588573  
H 11.130960 -0.808945 11.126833  
H 8.838946 -2.258510 12.748869  
H 9.185397 -2.444454 10.173106

1a-C16,  $\Delta G = 4.7578$  kcal/mol, population = 0.01 %

C 14.297795 -5.023346 9.119258  
C 13.737466 -5.963601 9.980332  
C 13.134414 -5.556492 11.164603  
C 13.078380 -4.202737 11.510090  
C 13.655983 -3.270782 10.644625  
C 14.259608 -3.674863 9.456996  
C 12.351965 -3.748407 12.750065  
C 10.822597 -3.633313 12.524695  
C 10.199695 -5.028679 12.412465  
O 9.386886 -5.161444 11.362293  
O 10.416935 -5.903999 13.221217  
C 8.747317 -6.455671 11.159065  
C 9.656528 -7.392414 10.391620  
C 10.127848 -0.345528 9.291963  
C 10.380935 -1.629230 8.493596  
C 10.697747 0.862241 8.541402  
C 10.706830 -0.362952 10.716337  
C 10.130100 -1.378669 11.718226  
N 10.464114 -2.767041 11.412933  
C 8.599159 -1.238671 11.774835  
O 7.940467 -2.308006 11.323778  
O 8.029888 -0.247741 12.173000  
H 14.766213 -5.340901 8.196306  
H 13.771746 -7.016533 9.729783  
H 12.706976 -6.295322 11.830322  
H 13.641208 -2.219390 10.906285  
H 14.700764 -2.936275 8.799506  
H 12.523993 -4.438511 13.575349

H 12.714109 -2.766296 13.055810  
H 10.387132 -3.217862 13.437273  
H 8.469677 -6.862956 12.129359  
H 7.848658 -6.216639 10.595523  
H 10.546437 -7.640604 10.969144  
H 9.119774 -8.317838 10.174460  
H 9.964021 -6.943676 9.446270  
H 9.044207 -0.203984 9.369989  
H 11.449205 -1.864105 8.457607  
H 9.857567 -2.489153 8.910730  
H 10.036984 -1.506680 7.464703  
H 11.782747 0.773213 8.434687  
H 10.487047 1.794328 9.069802  
H 10.268737 0.934850 7.540207  
H 11.788810 -0.516640 10.671825  
H 10.551392 0.624021 11.154738  
H 10.498318 -1.097053 12.709034  
H 8.651655 -2.967219 11.098693  
H 11.129105 -2.848644 10.656946

1a-C87,  $\Delta G = 4.7584$  kcal/mol, population = 0.01 %

C 12.668520 -5.780468 7.646257  
C 12.826571 -4.397548 7.646412  
C 13.028768 -3.718517 8.843412  
C 13.073152 -4.406246 10.057756  
C 12.926923 -5.795079 10.043776  
C 12.724275 -6.478100 8.848970  
C 13.218192 -3.666293 11.362882  
C 11.863352 -3.235884 11.977292  
C 11.044623 -4.484112 12.282342  
O 10.034901 -4.670400 11.436149  
O 11.328371 -5.229777 13.193826  
C 9.181064 -5.835140 11.625931  
C 8.085690 -5.539997 12.628655  
C 10.591569 0.410538 12.815202  
C 12.120849 0.355706 12.736909  
C 10.086647 -0.150142 14.146862  
C 9.869413 -0.216454 11.607667  
C 9.896392 -1.749482 11.495279  
N 11.197162 -2.293896 11.086622  
C 8.838507 -2.181565 10.463760  
O 7.649430 -2.005898 10.614172  
O 9.343509 -2.732096 9.361949  
H 12.510696 -6.310717 6.715586

H 12.793832 -3.846988 6.714505  
H 13.156036 -2.642948 8.833051  
H 12.969520 -6.346074 10.975806  
H 12.611942 -7.555144 8.857642  
H 13.731384 -4.284856 12.098720  
H 13.816580 -2.763269 11.226420  
H 12.076217 -2.795009 12.958290  
H 8.779283 -6.026113 10.633956  
H 9.802890 -6.673571 11.933284  
H 7.419028 -6.401466 12.698912  
H 8.500416 -5.346655 13.617992  
H 7.498403 -4.676134 12.314991  
H 10.314160 1.469297 12.781306  
H 12.560442 0.990818 13.508682  
H 12.506451 -0.652156 12.900647  
H 12.485345 0.709441 11.769505  
H 10.390471 -1.190481 14.286634  
H 8.996796 -0.108668 14.207914  
H 10.494296 0.421420 14.982826  
H 8.819276 0.076579 11.653849  
H 10.269911 0.207874 10.680794  
H 9.583108 -2.180158 12.446740  
H 10.309319 -2.846555 9.574607  
H 11.838885 -1.548897 10.850591

1a-C64,  $\Delta G = 4.8707$  kcal/mol, population = 0.01 %

C 12.957741 -5.423013 7.773588  
C 12.778859 -6.378917 8.768833  
C 12.852107 -6.013092 10.108911  
C 13.100406 -4.688986 10.476932  
C 13.290836 -3.741084 9.469505  
C 13.218689 -4.102553 8.128294  
C 13.107460 -4.291099 11.930642  
C 11.718927 -3.847961 12.455156  
C 10.744009 -5.007146 12.290593  
O 9.902610 -4.842058 11.272292  
O 10.777816 -5.983648 13.006767  
C 8.930606 -5.892490 11.002880  
C 7.682763 -5.694373 11.837174  
C 10.433033 0.555772 11.946743  
C 11.746078 0.455777 11.163822  
C 10.413170 1.836639 12.785990  
C 10.149977 -0.647074 12.861417  
C 10.022369 -2.034286 12.202938

N 11.297297 -2.628599 11.772372  
 C 9.063575 -1.973605 11.004727  
 O 7.903781 -1.637440 11.096761  
 O 9.622567 -2.293142 9.838792  
 H 12.901341 -5.705694 6.729948  
 H 12.584621 -7.410500 8.502713  
 H 12.711116 -6.763196 10.878005  
 H 13.499916 -2.712157 9.734678  
 H 13.367925 -3.353442 7.360670  
 H 13.442699 -5.122434 12.550499  
 H 13.799944 -3.463901 12.099011  
 H 11.808030 -3.696652 13.537164  
 H 8.725078 -5.790846 9.940094  
 H 9.400448 -6.855706 11.191232  
 H 7.249446 -4.710187 11.655270  
 H 6.943417 -6.450599 11.566886  
 H 7.901370 -5.794113 12.900463  
 H 9.614727 0.622700 11.222215  
 H 11.924286 1.377737 10.607101  
 H 12.596514 0.311680 11.837664  
 H 11.736867 -0.357603 10.437459  
 H 11.219922 1.826836 13.524485  
 H 9.467868 1.945269 13.321736  
 H 10.548398 2.716978 12.154656  
 H 10.927016 -0.720431 13.628746  
 H 9.211899 -0.455305 13.384680  
 H 9.544106 -2.690147 12.932262  
 H 10.525806 -2.626808 10.088914  
 H 12.044332 -1.951094 11.844103

1a-C20,  $\Delta G = 4.8726$  kcal/mol, population = 0.01 %

C 14.723230 -3.585708 8.500745  
 C 14.788755 -3.736115 9.884573  
 C 13.732335 -4.317625 10.573919  
 C 12.592595 -4.757637 9.895275  
 C 12.540374 -4.609899 8.509135  
 C 13.598130 -4.027355 7.814271  
 C 11.421159 -5.317536 10.662046  
 C 10.700588 -4.204181 11.452536  
 C 9.585856 -4.802472 12.306612  
 O 10.069358 -5.593242 13.257523  
 O 8.401606 -4.576467 12.143156  
 C 9.123054 -6.279051 14.132703  
 C 8.639155 -7.566773 13.501358

C 11.774666 -0.107336 11.801675  
 C 12.542954 -1.034588 12.747068  
 C 10.784530 0.772656 12.567759  
 C 11.109384 -0.881087 10.649667  
 C 9.989958 -1.856808 11.066741  
 N 10.144438 -3.218199 10.552441  
 C 8.583041 -1.346117 10.709106  
 O 8.327416 -0.204054 10.401191  
 O 7.612180 -2.258837 10.804606  
 H 15.545275 -3.129784 7.963696  
 H 15.664355 -3.399801 10.425639  
 H 13.790565 -4.428773 11.650410  
 H 11.666331 -4.953373 7.968021  
 H 13.539693 -3.918735 6.738538  
 H 10.709107 -5.784456 9.978825  
 H 11.752044 -6.078186 11.368153  
 H 11.428397 -3.772426 12.150583  
 H 9.694142 -6.463691 15.039147  
 H 8.301931 -5.599650 14.352564  
 H 7.990585 -8.090831 14.205844  
 H 8.069148 -7.370551 12.593230  
 H 9.479440 -8.218625 13.259137  
 H 12.507895 0.555187 11.329845  
 H 13.090176 -0.456854 13.494855  
 H 11.870664 -1.705257 13.289691  
 H 13.260471 -1.650250 12.200372  
 H 11.304776 1.371122 13.318689  
 H 10.036480 0.171703 13.092202  
 H 10.253314 1.447868 11.895644  
 H 10.706693 -0.167868 9.929858  
 H 11.881776 -1.458146 10.136801  
 H 9.964142 -1.928551 12.158921  
 H 7.993143 -3.135463 11.056140  
 H 10.640843 -3.209343 9.672319

1a-C51,  $\Delta G = 4.8852$  kcal/mol, population = 0.01 %

C 12.822982 -6.561364 8.490307  
 C 13.478430 -6.417063 9.709705  
 C 13.535070 -5.172528 10.326788  
 C 12.935737 -4.054357 9.742598  
 C 12.293306 -4.207608 8.512231  
 C 12.234456 -5.451506 7.891235  
 C 12.944806 -2.728753 10.458401  
 C 11.668181 -2.458082 11.306225

C 11.585191 -3.551934 12.367733  
 O 10.806008 -4.564804 11.981150  
 O 12.230504 -3.533386 13.392234  
 C 10.825098 -5.788477 12.773664  
 C 9.793700 -5.756674 13.880196  
 C 8.179178 -2.488213 12.813331  
 C 6.780872 -2.428022 12.193914  
 C 8.088390 -2.507138 14.340361  
 C 9.057937 -1.314267 12.359824  
 C 9.455135 -1.349333 10.882296  
 N 10.486632 -2.311089 10.459424  
 C 9.852367 0.042409 10.353755  
 O 10.721724 -0.005581 9.338209  
 O 9.399762 1.087279 10.757745  
 H 12.777946 -7.529138 8.006909  
 H 13.947676 -7.272751 10.179050  
 H 14.046999 -5.066954 11.276217  
 H 11.835320 -3.348744 8.037969  
 H 11.731959 -5.552733 6.937256  
 H 13.804169 -2.673422 11.127662  
 H 13.032801 -1.907412 9.746409  
 H 11.838639 -1.521891 11.835432  
 H 10.613850 -6.569805 12.047498  
 H 11.831273 -5.923728 13.165393  
 H 9.811560 -6.711418 14.409337  
 H 10.006895 -4.964530 14.596881  
 H 8.791199 -5.608752 13.478443  
 H 8.652226 -3.417851 12.489904  
 H 6.267558 -1.509372 12.491865  
 H 6.807167 -2.457749 11.102783  
 H 6.176227 -3.274091 12.526844  
 H 7.621930 -1.589204 14.709457  
 H 9.077200 -2.586913 14.796884  
 H 7.488213 -3.350472 14.687735  
 H 8.523827 -0.379217 12.538781  
 H 9.958932 -1.267615 12.976518  
 H 8.568663 -1.596332 10.291192  
 H 10.090466 -3.210930 10.225435  
 H 10.927963 -0.970734 9.244579

1a-C60,  $\Delta G = 5.0872$  kcal/mol, population = 0.01 %

C 14.960702 -3.272555 8.682917  
 C 13.763110 -3.221745 7.977555  
 C 12.626064 -3.842823 8.487111



C 12.667775 -4.512078 9.711677  
C 13.878703 -4.565616 10.405870  
C 15.016898 -3.952672 9.896853  
C 11.426994 -5.125070 10.304246  
C 10.704149 -4.169251 11.288288  
C 9.571164 -4.958268 11.931135  
O 10.016442 -5.761390 12.886797  
O 8.404079 -4.890327 11.588639  
C 9.050953 -6.618296 13.572302  
C 8.373881 -5.872970 14.702338  
C 11.676645 -0.835448 12.388424  
C 11.952535 0.457679 13.161561  
C 12.907503 -1.224989 11.567468  
C 10.414564 -0.674418 11.518021  
C 9.566839 -1.934782 11.342940  
N 10.167951 -3.029710 10.576759  
C 8.199544 -1.593865 10.710154  
O 7.438199 -2.643646 10.394292  
O 7.800946 -0.467183 10.514542  
H 15.846138 -2.791267 8.287461  
H 13.712648 -2.702623 7.028688  
H 11.699392 -3.810355 7.925916  
H 13.926124 -5.086013 11.355385  
H 15.947625 -4.002748 10.447926  
H 10.720867 -5.394074 9.516763  
H 11.687051 -6.032803 10.848059  
H 11.407701 -3.904570 12.087484  
H 8.335217 -6.986078 12.839806  
H 9.653831 -7.445651 13.937836  
H 7.713768 -6.557908 15.237742  
H 9.110545 -5.486282 15.407598  
H 7.774000 -5.044787 14.325513  
H 11.486846 -1.625404 13.123828  
H 11.117018 0.715364 13.816021  
H 12.850185 0.363169 13.776999  
H 12.107916 1.291658 12.470781  
H 13.775767 -1.376719 12.212298  
H 13.153092 -0.431042 10.856542  
H 12.756453 -2.140306 11.000961  
H 9.763467 0.076972 11.965714  
H 10.688270 -0.283343 10.532602  
H 9.325434 -2.318960 12.340246  
H 7.894405 -3.486265 10.639295  
H 10.815851 -2.685493 9.882200

1a-C68,  $\Delta G = 5.1349$  kcal/mol, population = 0.01 %

C 12.588173 -6.017137 7.853600  
C 12.617768 -4.625875 7.804457  
C 12.811461 -3.889670 8.968146  
C 12.972363 -4.529037 10.199997  
C 12.952858 -5.924243 10.234332  
C 12.761757 -6.664486 9.072186  
C 13.117888 -3.741856 11.477713  
C 11.768914 -3.294306 12.088855  
C 10.917269 -4.528149 12.367303  
O 9.873100 -4.642815 11.551020  
O 11.195529 -5.313272 13.246767  
C 8.981012 -5.782952 11.721895  
C 9.482006 -6.990651 10.960054  
C 10.703588 0.364221 13.057629  
C 10.345815 1.839820 13.263182  
C 12.223825 0.208044 12.958872  
C 9.938928 -0.172924 11.836132  
C 9.876972 -1.701105 11.684028  
N 11.128398 -2.314883 11.218675  
C 8.757879 -2.050118 10.684766  
O 7.588887 -1.799009 10.878346  
O 9.186649 -2.617240 9.559196  
H 12.437705 -6.590873 6.947817  
H 12.493715 -4.113472 6.858550  
H 12.842402 -2.808683 8.916653  
H 13.083011 -6.434296 11.181060  
H 12.745564 -7.746114 9.120270  
H 13.635615 -4.338141 12.228151  
H 13.716703 -2.843657 11.311518  
H 11.982275 -2.878054 13.080931  
H 8.881944 -5.986303 12.786561  
H 8.030877 -5.427343 11.330448  
H 8.739303 -7.788023 11.027656  
H 9.634601 -6.748991 9.907957  
H 10.420253 -7.357759 11.373284  
H 10.357229 -0.192390 13.935691  
H 9.270242 1.973391 13.395774  
H 10.849530 2.243205 14.143912  
H 10.655055 2.435797 12.399575  
H 12.541478 -0.833426 12.963473  
H 12.710255 0.693076 13.807513  
H 12.603678 0.678127 12.047081

H 8.907169 0.175036 11.901560  
H 10.354579 0.260079 10.918664  
H 9.576970 -2.131465 12.641785  
H 10.149388 -2.796768 9.733928  
H 11.802509 -1.602399 10.971236

1a-C81,  $\Delta G = 5.1650$  kcal/mol, population = 0.01 %

C 13.117252 -5.547751 8.024358  
C 13.276782 -4.203483 8.350545  
C 13.173713 -3.787642 9.673431  
C 12.903463 -4.705186 10.692103  
C 12.762796 -6.051955 10.354194  
C 12.865322 -6.472812 9.032088  
C 12.720457 -4.261849 12.121401  
C 11.305931 -3.711321 12.426493  
C 10.244145 -4.734099 12.042008  
O 10.276543 -5.779247 12.875296  
O 9.473069 -4.618060 11.118094  
C 9.304928 -6.845258 12.660001  
C 9.792147 -7.849175 11.637074  
C 10.560367 0.801272 11.851524  
C 11.931161 0.563998 11.209663  
C 10.593732 2.062356 12.719639  
C 10.046147 -0.374958 12.697510  
C 9.848431 -1.732980 11.997108  
N 11.094303 -2.460070 11.707624  
C 9.048585 -1.561308 10.697393  
O 9.687595 -1.970721 9.603299  
O 7.941650 -1.071415 10.656763  
H 13.196301 -5.871229 6.994135  
H 13.484498 -3.477805 7.574031  
H 13.309006 -2.741233 9.914707  
H 12.570647 -6.777257 11.134362  
H 12.750089 -7.522278 8.791167  
H 12.905380 -5.095015 12.797959  
H 13.434944 -3.476091 12.377114  
H 11.234393 -3.573662 13.512278  
H 9.192141 -7.297274 13.642575  
H 8.361293 -6.392823 12.360567  
H 10.739017 -8.293357 11.946178  
H 9.055299 -8.649464 11.544580  
H 9.921335 -7.386460 10.659310  
H 9.838788 0.972663 11.046218  
H 12.682572 0.314345 11.965328

H 11.910611 -0.231565 10.463851  
H 12.270451 1.467729 10.699855  
H 9.614400 2.269830 13.155901  
H 10.893628 2.931619 12.131113  
H 11.310103 1.948900 13.538401  
H 10.716854 -0.540360 13.546687  
H 9.080150 -0.087837 13.115925  
H 9.221331 -2.341729 12.650045  
H 10.508537 -2.408188 9.955966  
H 11.894390 -1.863638 11.867314

1a-C28,  $\Delta G = 5.5321$  kcal/mol, population = 0.00 %

C 12.415287 -6.734856 8.518593  
C 13.123554 -6.633549 9.711882  
C 13.316831 -5.390538 10.304655  
C 12.805865 -4.230371 9.720276  
C 12.109073 -4.342110 8.514074  
C 11.911146 -5.583798 7.919379  
C 12.982834 -2.894275 10.393823  
C 11.765876 -2.445271 11.246511  
C 11.613228 -3.407362 12.424023  
O 10.660587 -4.317517 12.219572  
O 12.317836 -3.359045 13.408521  
C 10.414260 -5.305418 13.262923  
C 11.290049 -6.525939 13.084587  
C 8.134810 -2.336132 12.682498  
C 6.748052 -2.007498 12.123940  
C 8.075066 -2.514801 14.200374  
C 9.161395 -1.252859 12.317953  
C 9.586936 -1.263277 10.847202  
N 10.581099 -2.258474 10.414566  
C 10.055244 0.120416 10.356729  
O 9.653928 1.175603 10.786772  
O 10.923781 0.056506 9.341067  
H 12.263851 -7.701494 8.054978  
H 13.526028 -7.522016 10.182134  
H 13.870609 -5.319265 11.233054  
H 11.722615 -3.451013 8.035789  
H 11.368823 -5.651774 6.984472  
H 13.854842 -2.919481 11.048122  
H 13.154925 -2.114194 9.651323  
H 12.033392 -1.483814 11.685721  
H 10.574299 -4.831019 14.228931  
H 9.359862 -5.546955 13.150268

H 11.014434 -7.273270 13.831199  
H 11.155350 -6.959898 12.093967  
H 12.342765 -6.279377 13.218379  
H 8.462924 -3.281469 12.244067  
H 6.038756 -2.804391 12.356955  
H 6.367611 -1.079795 12.560634  
H 6.756071 -1.885795 11.038602  
H 9.051593 -2.784942 14.607793  
H 7.365788 -3.297780 14.476442  
H 7.756883 -1.587737 14.685949  
H 8.737640 -0.271686 12.539992  
H 10.046550 -1.344818 12.951824  
H 8.701346 -1.456225 10.234041  
H 10.150549 -3.143063 10.182965  
H 11.084653 -0.913773 9.220385

1a-C90,  $\Delta G = 5.5478$  kcal/mol, population = 0.00 %

C 15.066722 -3.378955 9.069032  
C 13.944178 -3.417802 8.249919  
C 12.773828 -4.023927 8.699190  
C 12.710292 -4.599044 9.969326  
C 13.845426 -4.556699 10.782644  
C 15.014390 -3.952412 10.337391  
C 11.432174 -5.221327 10.469577  
C 10.707107 -4.329748 11.502592  
C 9.446487 -5.057858 11.953989  
O 9.739384 -5.965151 12.889789  
O 8.340702 -4.866478 11.502213  
C 8.650410 -6.790097 13.398502  
C 7.911043 -6.084180 14.515692  
C 11.668979 -0.178133 11.441173  
C 10.933863 0.359292 10.210696  
C 12.964675 -0.893436 11.040498  
C 10.775015 -1.001064 12.396469  
C 9.802659 -2.039329 11.815013  
N 10.355218 -3.050683 10.903171  
C 8.562872 -1.406383 11.156429  
O 7.954305 -0.471511 11.626528  
O 8.177792 -2.016007 10.036655  
H 15.977322 -2.906621 8.723138  
H 13.975709 -2.975243 7.262293  
H 11.901012 -4.051353 8.057663  
H 13.812692 -5.001178 11.770511  
H 15.885947 -3.928002 10.979457

H 10.752811 -5.400182 9.634561  
H 11.640087 -6.181314 10.943145  
H 11.355053 -4.213053 12.378412  
H 7.989372 -7.040898 12.570823  
H 9.146116 -7.691507 13.750850  
H 7.150059 -6.752495 14.923180  
H 8.594769 -5.812766 15.321158  
H 7.416294 -5.183518 14.152445  
H 11.974395 0.689626 12.034382  
H 10.048011 0.931731 10.487566  
H 11.592126 1.012402 9.634341  
H 10.618216 -0.445639 9.541079  
H 12.808434 -1.699875 10.322933  
H 13.466554 -1.320798 11.910157  
H 13.652006 -0.188403 10.568049  
H 11.418817 -1.515759 13.113577  
H 10.157922 -0.312751 12.976418  
H 9.378536 -2.567557 12.673348  
H 8.838321 -2.754348 9.929246  
H 11.154882 -2.688101 10.401193

1a-C80,  $\Delta G = 5.6476$  kcal/mol, population = 0.00 %

C 12.395192 -6.022629 7.808697  
C 12.438522 -4.635246 7.698665  
C 12.680402 -3.852537 8.822351  
C 12.876170 -4.440685 10.074383  
C 12.842885 -5.832738 10.169393  
C 12.603545 -6.619490 9.047488  
C 13.074399 -3.601685 11.311172  
C 11.751695 -3.117181 11.951332  
C 10.903960 -4.329827 12.319945  
O 9.828000 -4.473743 11.550840  
O 11.210938 -5.075080 13.224168  
C 8.936791 -5.598296 11.807481  
C 9.398998 -6.840795 11.077780  
C 10.778647 0.606993 12.736736  
C 12.290822 0.438231 12.560292  
C 10.329282 0.128210 14.119173  
C 9.932562 -0.001587 11.602189  
C 9.849983 -1.535366 11.530794  
N 11.084287 -2.176890 11.059393  
C 8.700883 -1.918818 10.581096  
O 9.092286 -2.546278 9.473979  
O 7.540209 -1.645676 10.794333

H 12.207450 -6.632664 6.934134  
H 12.287593 -4.162155 6.736332  
H 12.721598 -2.775030 8.723818  
H 13.001541 -6.303689 11.131905  
H 12.577282 -7.697796 9.142710  
H 13.616016 -4.169069 12.067201  
H 13.671930 -2.715916 11.084300  
H 12.007625 -2.656654 12.913245  
H 8.880529 -5.755038 12.883102  
H 7.973458 -5.252331 11.440345  
H 10.350602 -7.198281 11.468476  
H 8.654313 -7.628578 11.207303  
H 9.511521 -6.643458 10.011503  
H 10.574616 1.681527 12.682878  
H 12.614826 0.733773 11.559541  
H 12.825547 1.062544 13.278961  
H 12.612049 -0.589785 12.735421  
H 9.251338 0.246359 14.250800  
H 10.829834 0.699984 14.902974  
H 10.573871 -0.924486 14.280876  
H 8.910339 0.363586 11.711946  
H 10.294494 0.371325 10.638257  
H 9.570685 -1.922695 12.511308  
H 10.058378 -2.725215 9.630042  
H 11.751217 -1.480232 10.754949

1a-C45,  $\Delta G = 5.7072$  kcal/mol, population = 0.00 %

C 14.838516 -2.854774 8.431538  
C 15.103958 -3.152944 9.766098  
C 14.132368 -3.757836 10.554159  
C 12.877870 -4.073197 10.026619  
C 12.626389 -3.776829 8.687432  
C 13.597161 -3.172838 7.893018  
C 11.811183 -4.713484 10.883453  
C 11.496582 -3.908702 12.151517  
C 10.398392 -4.520405 13.030287  
O 10.273409 -5.836568 12.864107  
O 9.764986 -3.866192 13.829584  
C 9.310986 -6.542703 13.704425  
C 7.913585 -6.459153 13.127978  
C 8.005244 -3.097728 10.988747  
C 7.735320 -3.358295 9.505197  
C 6.695835 -2.948272 11.762855  
C 8.887307 -1.855606 11.187710

C 10.360808 -2.067783 10.812136  
N 11.255377 -2.486117 11.901941  
C 10.985574 -0.823471 10.151215  
O 12.244469 -0.594580 10.520600  
O 10.413711 -0.134385 9.336986  
H 15.594030 -2.379723 7.818721  
H 16.069619 -2.913228 10.193532  
H 14.354222 -3.983977 11.590331  
H 11.660848 -4.019643 8.259027  
H 13.379530 -2.947900 6.856423  
H 10.907135 -4.866930 10.293589  
H 12.131799 -5.705652 11.201257  
H 12.383563 -3.949173 12.793152  
H 9.679952 -7.565372 13.716138  
H 9.360008 -6.127696 14.709543  
H 7.896785 -6.820622 12.098863  
H 7.243754 -7.084612 13.721134  
H 7.535965 -5.438145 13.150817  
H 8.528187 -3.969139 11.391017  
H 8.657302 -3.459526 8.928392  
H 7.161469 -4.277365 9.371082  
H 7.162334 -2.534421 9.071202  
H 6.050006 -3.816505 11.615902  
H 6.148269 -2.063435 11.425794  
H 6.883257 -2.840743 12.833267  
H 8.481695 -1.043491 10.581342  
H 8.842821 -1.529456 12.229601  
H 10.415086 -2.817094 10.023317  
H 12.425612 -1.312636 11.189785  
H 10.959093 -2.055372 12.771775

1a-C63,  $\Delta G = 5.7988$  kcal/mol, population = 0.00 %

C 13.783070 -5.167346 8.067736  
C 13.949296 -3.844963 8.464374  
C 13.556776 -3.445344 9.738526  
C 12.986922 -4.354548 10.632132  
C 12.838246 -5.683353 10.226435  
C 13.230963 -6.087250 8.955787  
C 12.517956 -3.900928 11.990940  
C 10.999381 -3.589315 12.056964  
C 10.203289 -4.890425 11.921334  
O 10.377370 -5.672299 12.987570  
O 9.521350 -5.182747 10.963569  
C 9.688296 -6.957523 13.013007



C 8.267994 -6.803225 13.514027  
 C 11.031079 0.573192 12.049919  
 C 12.290107 -0.186992 12.466884  
 C 10.201820 0.967798 13.274688  
 C 10.180907 -0.160777 10.999126  
 C 9.663603 -1.558916 11.395806  
 N 10.591438 -2.629347 11.052829  
 C 8.286930 -1.791753 10.742330  
 O 8.180778 -2.885259 9.992696  
 O 7.352210 -1.035135 10.894691  
 H 14.089457 -5.482310 7.078314  
 H 14.389084 -3.124478 7.786199  
 H 13.711074 -2.417139 10.045156  
 H 12.420069 -6.410753 10.911767  
 H 13.110055 -7.121730 8.659455  
 H 12.733412 -4.660953 12.741014  
 H 13.048999 -2.995582 12.281302  
 H 10.795799 -3.208382 13.062776  
 H 9.720887 -7.388037 12.013755  
 H 10.289448 -7.563128 13.686900  
 H 7.673060 -6.197829 12.830433  
 H 7.804498 -7.788598 13.591107  
 H 8.254488 -6.340383 14.501656  
 H 11.353616 1.499082 11.561869  
 H 12.915700 0.434250 13.110813  
 H 12.040288 -1.087548 13.031200  
 H 12.888842 -0.479881 11.602018  
 H 9.315345 1.536596 12.986465  
 H 10.792745 1.582384 13.956796  
 H 9.869518 0.089854 13.834960  
 H 9.320437 0.467767 10.770219  
 H 10.747551 -0.264455 10.068396  
 H 9.463568 -1.576800 12.471604  
 H 9.026664 -3.391556 10.081174  
 H 11.354556 -2.316110 10.473763

1a-C93,  $\Delta G = 5.8816$  kcal/mol, population = 0.00 %

C 14.973751 -3.519251 9.066543  
 C 14.963750 -3.980649 10.380709  
 C 13.805554 -4.526705 10.919700  
 C 12.639825 -4.622808 10.155775  
 C 12.661233 -4.160981 8.838789  
 C 13.820191 -3.612099 8.296097  
 C 11.375189 -5.178767 10.757608

C 10.676855 -4.172135 11.701255  
 C 9.425668 -4.844457 12.252193  
 O 9.740885 -5.658473 13.263993  
 O 8.308817 -4.690074 11.813810  
 C 8.680229 -6.487469 13.822708  
 C 8.498589 -7.753435 13.012000  
 C 11.687108 -0.086586 11.252238  
 C 10.994350 0.335957 9.954122  
 C 12.972668 -0.870248 10.960478  
 C 10.751059 -0.785736 12.263765  
 C 9.770020 -1.859690 11.766253  
 N 10.316874 -2.966622 10.969897  
 C 8.555446 -1.274563 11.022340  
 O 8.164974 -2.001893 9.976672  
 O 7.966517 -0.276603 11.371966  
 H 15.875615 -3.091750 8.647233  
 H 15.859422 -3.913788 10.985463  
 H 13.804258 -4.883149 11.943223  
 H 11.764906 -4.232258 8.234168  
 H 13.819132 -3.257038 7.273266  
 H 10.673239 -5.450682 9.967472  
 H 11.596282 -6.078018 11.332958  
 H 11.344541 -3.963821 12.544567  
 H 9.019145 -6.701840 14.833376  
 H 7.765853 -5.898551 13.865184  
 H 7.745493 -8.383091 13.489548  
 H 8.162846 -7.527781 11.999712  
 H 9.431677 -8.315865 12.958563  
 H 12.000547 0.831226 11.759749  
 H 11.680761 0.912861 9.331266  
 H 10.676473 -0.526663 9.361788  
 H 10.114983 0.951062 10.147620  
 H 13.688207 -0.235780 10.433110  
 H 12.809695 -1.744065 10.329107  
 H 13.444159 -1.215438 11.882220  
 H 11.364157 -1.233732 13.049322  
 H 10.135091 -0.027874 12.750834  
 H 9.317979 -2.293778 12.662024  
 H 8.810344 -2.761164 9.961936  
 H 11.111625 -2.660727 10.424146

1a-C54,  $\Delta G = 6.0228$  kcal/mol, population = 0.00 %

C 13.692493 -5.402040 8.207146  
 C 13.923727 -4.070900 8.536721

C 13.524708 -3.579685 9.776453  
C 12.882773 -4.405230 10.702155  
C 12.670396 -5.744031 10.364580  
C 13.068837 -6.239346 9.128597  
C 12.407865 -3.855475 12.023258  
C 10.912049 -3.446180 12.033606  
C 10.026860 -4.694135 11.965565  
O 10.108669 -5.402562 13.092314  
O 9.342057 -5.000393 11.013971  
C 9.326269 -6.630042 13.189333  
C 10.044518 -7.798888 12.549262  
C 11.010250 0.638635 12.103482  
C 12.214305 -0.140658 12.632891  
C 10.040561 0.983230 13.237036  
C 10.293831 -0.036625 10.921952  
C 9.673343 -1.422539 11.187231  
N 10.589265 -2.533375 10.958689  
C 8.395568 -1.588906 10.336638  
O 8.298236 -2.731775 9.663534  
O 7.521837 -0.750187 10.287689  
H 14.003781 -5.787330 7.244506  
H 14.419778 -3.414493 7.832780  
H 13.729904 -2.545639 10.029221  
H 12.197650 -6.407990 11.076828  
H 12.896801 -7.280664 8.886359  
H 12.556884 -4.588161 12.815664  
H 12.987202 -2.970705 12.284184  
H 10.715634 -2.989422 13.008991  
H 9.202097 -6.774106 14.259832  
H 8.353837 -6.454908 12.732681  
H 11.036140 -7.931365 12.984363  
H 9.471015 -8.710791 12.725732  
H 10.141723 -7.662391 11.472523  
H 11.388209 1.584861 11.701484  
H 12.912732 -0.395471 11.833326  
H 12.756143 0.453132 13.371988  
H 11.907303 -1.064292 13.126911  
H 9.191703 1.563846 12.869697  
H 10.544710 1.569529 14.007933  
H 9.648182 0.084375 13.720013  
H 9.496181 0.629770 10.594041  
H 10.985371 -0.134259 10.078747  
H 9.316024 -1.466284 12.220379  
H 9.078492 -3.289174 9.909680

H 11.390595 -2.272800 10.405210

1a-C74,  $\Delta G = 6.1352$  kcal/mol, population = 0.00 %

C 12.922929 -5.983742 7.850493  
C 12.941961 -6.627210 9.083223  
C 12.908976 -5.882128 10.257834  
C 12.850260 -4.488088 10.223526  
C 12.844138 -3.852590 8.979417  
C 12.877866 -4.592718 7.803024  
C 12.768953 -3.708364 11.512404  
C 11.345397 -3.222588 11.884118  
C 10.377734 -4.401298 11.832258  
O 10.573073 -5.239467 12.841805  
O 9.528831 -4.556896 10.974512  
C 9.707746 -6.414047 12.938639  
C 10.232090 -7.562158 12.104482  
C 10.744519 0.073380 13.262064  
C 10.378963 1.377896 13.978214  
C 12.268629 -0.045134 13.160104  
C 10.034872 0.016356 11.895446  
C 9.735841 -1.383390 11.356124  
N 10.900767 -2.185650 10.979092  
C 8.768392 -1.319487 10.154356  
O 8.155953 -0.327691 9.825437  
O 8.616319 -2.462842 9.484264  
H 12.949936 -6.559421 6.933911  
H 12.986271 -7.708056 9.133040  
H 12.930762 -6.388577 11.214469  
H 12.814344 -2.772215 8.926197  
H 12.872990 -4.082828 6.847667  
H 13.131540 -4.322616 12.335283  
H 13.410340 -2.825205 11.468097  
H 11.379691 -2.895588 12.930562  
H 9.714371 -6.651136 13.999564  
H 8.703463 -6.121862 12.638612  
H 11.239914 -7.841049 12.413393  
H 9.581070 -8.427199 12.244536  
H 10.244443 -7.308929 11.045128  
H 10.373264 -0.756148 13.874738  
H 10.692380 2.242300 13.385466  
H 9.301258 1.453309 14.137011  
H 10.871891 1.443618 14.950604  
H 12.671770 0.767145 12.549057  
H 12.592253 -0.985067 12.716502

H 12.726007 0.022737 14.149447  
H 9.077715 0.532806 11.972920  
H 10.616477 0.572379 11.152225  
H 9.184592 -1.933087 12.127521  
H 9.154735 -3.178717 9.904172  
H 11.664140 -1.596432 10.681655

1a-C89,  $\Delta G = 6.2431$  kcal/mol, population = 0.00 %

C 13.987724 -3.122184 8.211672  
C 12.765640 -3.423504 7.621909  
C 11.748320 -4.004403 8.375073  
C 11.933938 -4.288300 9.726623  
C 13.173177 -3.995277 10.305322  
C 14.190294 -3.414690 9.558815  
C 10.843916 -4.916414 10.560646  
C 10.340794 -4.017628 11.715732  
C 9.685691 -4.850058 12.816823  
O 10.503595 -5.804121 13.256623  
O 8.575988 -4.639556 13.256246  
C 10.018012 -6.686598 14.311823  
C 9.221859 -7.836702 13.733166  
C 11.215836 -0.929783 12.903276  
C 10.316021 0.227614 13.342129  
C 12.662935 -0.689563 13.339081  
C 11.165058 -1.157407 11.385632  
C 9.822319 -1.664737 10.866114  
N 9.374322 -2.999236 11.302500  
C 9.711767 -1.577173 9.334068  
O 10.205892 -0.704415 8.658325  
O 8.932892 -2.527692 8.811172  
H 14.778059 -2.667127 7.628163  
H 12.598939 -3.204041 6.574712  
H 10.797673 -4.227443 7.908973  
H 13.343971 -4.224094 11.351164  
H 15.141261 -3.191790 10.026329  
H 9.992378 -5.191748 9.937299  
H 11.232084 -5.834251 11.002066  
H 11.218052 -3.571184 12.191840  
H 10.925800 -7.030858 14.801191  
H 9.429564 -6.097305 15.012522  
H 9.819675 -8.398969 13.014727  
H 8.929075 -8.512655 14.538812  
H 8.317191 -7.480719 13.240241  
H 10.861298 -1.834120 13.408854

H 10.622385 1.158384 12.856399  
H 9.266567 0.051203 13.098386  
H 10.378470 0.375600 14.422119  
H 13.067851 0.203378 12.854217  
H 13.301914 -1.534319 13.071722  
H 12.728723 -0.543238 14.419155  
H 11.377353 -0.215952 10.875436  
H 11.955404 -1.845461 11.083408  
H 9.046581 -0.970670 11.202732  
H 8.657593 -2.930558 12.013648  
H 8.725256 -3.113470 9.588923

1a-C100,  $\Delta G = 6.2914$  kcal/mol, population = 0.00 %

C 14.500903 -4.128218 9.494514  
C 13.573298 -5.159615 9.612228  
C 12.599021 -5.114306 10.602509  
C 12.525544 -4.035009 11.487850  
C 13.470443 -3.015195 11.366340  
C 14.450806 -3.058033 10.380369  
C 11.466966 -3.965781 12.558719  
C 10.006431 -3.779852 12.051904  
C 9.477353 -5.054235 11.408623  
O 9.344567 -6.027590 12.312558  
O 9.220391 -5.169695 10.231518  
C 8.872507 -7.328041 11.850318  
C 9.999761 -8.157127 11.272209  
C 11.580520 -0.589250 9.383010  
C 11.713731 0.643451 8.482552  
C 11.565656 -1.859998 8.528138  
C 10.341227 -0.416605 10.278427  
C 10.220605 -1.354924 11.494430  
N 9.763166 -2.686218 11.116693  
C 9.178371 -0.742846 12.441841  
O 9.405316 0.167598 13.203673  
O 7.959098 -1.279431 12.317390  
H 15.258532 -4.162296 8.721975  
H 13.610670 -6.003645 8.934954  
H 11.898467 -5.933416 10.688395  
H 13.442095 -2.177822 12.053115  
H 15.170398 -2.252773 10.302571  
H 11.477568 -4.871671 13.167297  
H 11.692490 -3.142010 13.235518  
H 9.400245 -3.616503 12.946922  
H 8.459428 -7.784946 12.746153

H 8.075466 -7.168322 11.126254  
H 10.819242 -8.249604 11.986163  
H 9.628130 -9.158660 11.047624  
H 10.379040 -7.723195 10.347384  
H 12.458784 -0.627419 10.034592  
H 10.850502 0.732272 7.816445  
H 11.779791 1.561176 9.070806  
H 12.608368 0.573791 7.860600  
H 10.641283 -1.926807 7.946927  
H 11.674221 -2.766674 9.121395  
H 12.399830 -1.850337 7.824360  
H 10.357083 0.600768 10.673252  
H 9.431762 -0.505550 9.674654  
H 11.171563 -1.352736 12.031528  
H 8.077206 -2.014355 11.663386  
H 10.030950 -2.948006 10.179240

1a-C29,  $\Delta G = 6.4031$  kcal/mol, population = 0.00 %

C 13.802580 -6.840044 8.929738  
C 12.557280 -7.277938 9.366228  
C 11.507304 -6.374201 9.500172  
C 11.684510 -5.024872 9.196551  
C 12.938188 -4.595975 8.753619  
C 13.990254 -5.494253 8.621929  
C 10.559348 -4.038343 9.377835  
C 10.750136 -3.104160 10.593737  
C 10.973281 -3.962758 11.835385  
O 12.247856 -3.966532 12.226006  
O 10.080276 -4.574389 12.379592  
C 12.609995 -4.798944 13.368593  
C 12.860587 -6.230433 12.945677  
C 9.863853 -0.622442 13.895498  
C 8.926412 -1.802317 14.162928  
C 9.111942 0.708924 13.977080  
C 10.640761 -0.754600 12.573079  
C 9.763334 -0.902699 11.316073  
N 9.577217 -2.238913 10.727173  
C 10.183225 0.055035 10.183633  
O 9.864197 -0.392851 8.964805  
O 10.694487 1.136363 10.353725  
H 14.621488 -7.540851 8.827151  
H 12.402622 -8.322040 9.607975  
H 10.540965 -6.718604 9.848705  
H 13.090218 -3.550972 8.508861

H 14.955806 -5.146334 8.276431  
H 10.464407 -3.403163 8.495388  
H 9.613677 -4.567899 9.504230  
H 11.631566 -2.485050 10.434491  
H 13.511455 -4.329467 13.754817  
H 11.818087 -4.726222 14.112000  
H 13.608943 -6.275323 12.154139  
H 13.227478 -6.798105 13.803043  
H 11.947250 -6.701383 12.585275  
H 10.621742 -0.618471 14.685727  
H 8.113047 -1.841441 13.432291  
H 9.454597 -2.755512 14.124495  
H 8.465625 -1.708156 15.148499  
H 8.634339 0.822792 14.952421  
H 8.323743 0.775710 13.221730  
H 9.787726 1.553722 13.828352  
H 11.259156 0.134827 12.451309  
H 11.330054 -1.595785 12.640287  
H 8.753235 -0.557752 11.555202  
H 8.817666 -2.742773 11.167888  
H 9.488443 -1.295952 9.129704

1a-C83,  $\Delta G = 6.5023$  kcal/mol, population = 0.00 %

C 14.991972 -6.451841 10.958836  
C 14.150359 -6.545755 9.855977  
C 13.233117 -5.533527 9.589805  
C 13.146489 -4.413719 10.416561  
C 14.001070 -4.325801 11.518594  
C 14.915759 -5.336307 11.789874  
C 12.114884 -3.345649 10.160129  
C 10.947846 -3.386100 11.174926  
C 10.279421 -4.751335 11.114939  
O 10.562244 -5.494432 12.184463  
O 9.585096 -5.105658 10.187470  
C 10.051678 -6.861225 12.218443  
C 10.973392 -7.803998 11.474654  
C 8.637304 0.207672 9.449112  
C 7.693529 0.868052 10.457649  
C 7.978736 -1.028002 8.825069  
C 10.063220 -0.026280 9.989445  
C 10.303578 -0.986162 11.169773  
N 9.912607 -2.380200 10.921619  
C 9.638977 -0.504767 12.469888  
O 8.771105 -1.375440 12.989345



O 9.889327 0.555197 12.995772  
H 15.704026 -7.239694 11.169855  
H 14.202571 -7.409214 9.204618  
H 12.572738 -5.615888 8.734837  
H 13.949687 -3.459663 12.168331  
H 15.571376 -5.253276 12.647787  
H 12.575065 -2.357378 10.214087  
H 11.696856 -3.458793 9.158352  
H 11.333860 -3.236977 12.182304  
H 10.006536 -7.095388 13.279261  
H 9.045240 -6.865533 11.803985  
H 11.988284 -7.745122 11.868481  
H 10.613097 -8.827516 11.594868  
H 11.000866 -7.570572 10.411203  
H 8.785606 0.926084 8.635682  
H 7.421013 0.186419 11.265479  
H 8.141408 1.757887 10.902551  
H 6.766831 1.165484 9.962418  
H 7.089613 -0.734662 8.263592  
H 7.652222 -1.742888 9.583922  
H 8.650596 -1.538728 8.130070  
H 10.690867 -0.381597 9.168130  
H 10.469798 0.939972 10.294279  
H 11.374872 -0.933934 11.381391  
H 8.796081 -2.141055 12.352935  
H 9.531326 -2.510466 9.994581

1a-C95,  $\Delta G = 6.7369$  kcal/mol, population = 0.00 %

C 14.347570 -4.773578 8.954875  
C 13.624215 -5.820371 9.520683  
C 12.864949 -5.606646 10.665154  
C 12.809337 -4.344867 11.263227  
C 13.553137 -3.308628 10.696049  
C 14.315095 -3.517161 9.550183  
C 11.929320 -4.093698 12.459919  
C 10.448100 -3.824285 12.075033  
C 9.795282 -5.063520 11.468107  
O 9.746664 -6.056958 12.363506  
O 9.370155 -5.139168 10.339250  
C 9.111859 -7.305683 11.958961  
C 10.076256 -8.215193 11.227411  
C 10.727927 0.049826 9.553866  
C 9.346047 0.690695 9.402630  
C 10.910592 -1.092785 8.548035

C 11.094689 -0.308322 11.008835  
 C 10.290479 -1.364791 11.791463  
 N 10.258491 -2.693641 11.175360  
 C 8.842201 -0.911028 12.045262  
 O 8.549376 0.062754 12.700046  
 O 7.923574 -1.701050 11.484727  
 H 14.938150 -4.939171 8.062785  
 H 13.653557 -6.805442 9.071928  
 H 12.316185 -6.430041 11.102520  
 H 13.546769 -2.331777 11.162864  
 H 14.883282 -2.698867 9.125962  
 H 11.954382 -4.941982 13.143921  
 H 12.289058 -3.223228 13.010185  
 H 9.903854 -3.617226 12.998928  
 H 8.782779 -7.745269 12.897478  
 H 8.242953 -7.067497 11.347983  
 H 10.955770 -8.423466 11.838330  
 H 9.579614 -9.163693 11.014117  
 H 10.393719 -7.777569 10.281405  
 H 11.463352 0.817265 9.289053  
 H 9.204863 1.509601 10.110193  
 H 9.228416 1.092138 8.393861  
 H 8.543259 -0.032332 9.555671  
 H 10.870770 -0.703197 7.528883  
 H 10.120504 -1.841744 8.634011  
 H 11.875405 -1.591064 8.671477  
 H 12.137841 -0.629521 11.028544  
 H 11.045318 0.606219 11.602984  
 H 10.748966 -1.408671 12.784158  
 H 8.463580 -2.403906 11.028680  
 H 10.869027 -2.765321 10.373934

1a-C92,  $\Delta G = 6.8537$  kcal/mol, population = 0.00 %

C 14.172802 -2.943214 8.541573  
 C 12.996141 -3.108676 7.820632  
 C 11.908105 -3.762129 8.394605  
 C 11.978126 -4.254802 9.695962  
 C 13.173076 -4.097824 10.406015  
 C 14.260036 -3.446197 9.838123  
 C 10.805000 -4.942614 10.350138  
 C 10.205437 -4.146745 11.535597  
 C 9.490826 -5.060315 12.530944  
 O 10.265036 -6.075467 12.907241  
 O 8.371972 -4.857619 12.950914

C 9.746311 -6.988764 13.919946  
 C 9.999966 -6.453975 15.313267  
 C 11.053720 -1.119273 12.901179  
 C 10.111847 -0.015069 13.386200  
 C 12.487289 -0.857035 13.367733  
 C 11.031886 -1.269531 11.373318  
 C 9.701982 -1.748708 10.796724  
 N 9.251242 -3.109791 11.139476  
 C 9.628161 -1.569503 9.269871  
 O 10.105684 -0.637769 8.664414  
 O 8.906931 -2.517431 8.666425  
 H 15.017659 -2.431915 8.097798  
 H 12.919462 -2.726058 6.810554  
 H 10.993779 -3.879626 7.828272  
 H 13.251895 -4.487304 11.414677  
 H 15.174950 -3.330128 10.405594  
 H 10.015161 -5.137565 9.624100  
 H 11.138326 -5.906549 10.733134  
 H 11.041969 -3.730387 12.105025  
 H 8.686097 -7.146988 13.732381  
 H 10.288003 -7.913777 13.738429  
 H 9.455769 -5.525209 15.484388  
 H 9.662055 -7.188320 16.046929  
 H 11.064352 -6.276431 15.472290  
 H 10.722009 -2.058889 13.355371  
 H 10.166352 0.086956 14.471917  
 H 10.384946 0.947102 12.943515  
 H 9.070039 -0.218758 13.131154  
 H 12.537381 -0.771053 14.455081  
 H 12.866396 0.075179 12.939341  
 H 13.156365 -1.663574 13.059596  
 H 11.252717 -0.302305 10.917661  
 H 11.829065 -1.941141 11.053244  
 H 8.916395 -1.078211 11.156805  
 H 8.506014 -3.085510 11.823924  
 H 8.690237 -3.148319 9.407498

**Table S6.** Geometry data of conformers of structure **1b**

1b-C11,  $\Delta G = 0.0000$  kcal/mol, population = 60.41 %

C 8.094132 0.469146 -3.160704  
 C 7.450392 -0.442290 -3.990005  
 C 6.186957 -0.153051 -4.496770  
 C 5.551615 1.049056 -4.186708  
 C 6.209340 1.960573 -3.357087

C 7.469739 1.674157 -2.846365  
 C 4.161861 1.338310 -4.695188  
 C 3.092096 1.241231 -3.592653  
 C 3.201329 -0.118449 -2.902624  
 O 3.674315 -0.012737 -1.660066  
 O 2.888067 -1.158895 -3.438333  
 C 3.903237 -1.243492 -0.909997  
 C 5.257621 -1.834490 -1.238668  
 C -0.544863 -0.593824 -3.481787  
 C -1.793308 -1.214253 -4.113780  
 C -0.396605 -1.040633 -2.026326  
 C -0.608710 0.934685 -3.612405  
 C 0.676941 1.669620 -3.210059  
 N 1.765531 1.443305 -4.170725  
 C 0.391401 3.177041 -3.139350  
 O 0.972586 3.882532 -4.111512  
 O -0.313555 3.687203 -2.299140  
 H 9.075885 0.245210 -2.762869  
 H 7.928131 -1.381439 -4.239614  
 H 5.685376 -0.870974 -5.134470  
 H 5.730507 2.900760 -3.108791  
 H 7.966503 2.391329 -2.204806  
 H 4.102900 2.343296 -5.116652  
 H 3.903084 0.632706 -5.486986  
 H 3.267035 2.018823 -2.850104  
 H 3.841234 -0.930375 0.129381  
 H 3.092667 -1.936549 -1.127997  
 H 5.437325 -2.699059 -0.596707  
 H 5.305161 -2.159540 -2.276996  
 H 6.050454 -1.105679 -1.067537  
 H 0.326365 -0.958681 -4.034113  
 H -1.884546 -0.936815 -5.166231  
 H -1.759305 -2.303860 -4.052948  
 H -2.696974 -0.878044 -3.597421  
 H -1.245950 -0.697125 -1.428889  
 H 0.513850 -0.657981 -1.563014  
 H -0.358464 -2.129764 -1.962860  
 H -0.846809 1.205969 -4.645764  
 H -1.422660 1.313846 -2.990769  
 H 0.962871 1.368004 -2.199639  
 H 1.546352 0.685406 -4.806893  
 H 1.494692 3.204320 -4.619229

1b-C20,  $\Delta G = 0.6752$  kcal/mol, population = 19.30 %

C 8.178882 0.921809 -3.030815  
C 7.490051 2.113431 -2.817945  
C 6.215298 2.286181 -3.345082  
C 5.609248 1.273746 -4.091412  
C 6.310150 0.086333 -4.304357  
C 7.585997 -0.091089 -3.777634  
C 4.201737 1.438461 -4.603580  
C 3.132580 1.175905 -3.521918  
C 3.361118 -0.213646 -2.928775  
O 3.988107 -0.155297 -1.753650  
O 3.038292 -1.236524 -3.491972  
C 4.391676 -1.412051 -1.133606  
C 3.271630 -1.996005 -0.299162  
C -0.430694 -0.907457 -3.795737  
C -1.593729 -1.477903 -4.610977  
C -0.382960 -1.539706 -2.404034  
C -0.552009 0.621809 -3.723687  
C 0.683743 1.337770 -3.160067  
N 1.803716 1.311524 -4.109169  
C 0.322003 2.801410 -2.871266  
O -0.404796 3.148416 -1.969098  
O 0.859988 3.669885 -3.731045  
H 9.171807 0.786672 -2.620810  
H 7.947457 2.908949 -2.242907  
H 5.684141 3.215624 -3.174631  
H 5.851211 -0.707072 -4.882190  
H 8.116243 -1.018982 -3.952393  
H 4.041425 2.451612 -4.974627  
H 4.022500 0.750128 -5.432170  
H 3.242179 1.912063 -2.725686  
H 4.711626 -2.095179 -1.918345  
H 5.248378 -1.137601 -0.522835  
H 3.633761 -2.887452 0.216552  
H 2.934433 -1.280030 0.451564  
H 2.424561 -2.281414 -0.921960  
H 0.499618 -1.163824 -4.311650  
H -1.517225 -2.564251 -4.689948  
H -2.551099 -1.243604 -4.136634  
H -1.609712 -1.065464 -5.622245  
H -1.300526 -1.321168 -1.850365  
H 0.459011 -1.176141 -1.814328  
H -0.283595 -2.624377 -2.477654  
H -0.750886 1.024268 -4.722027  
H -1.410222 0.882490 -3.100650

H 0.951623 0.892340 -2.198534  
H 1.666468 0.603156 -4.820514  
H 1.414537 3.102928 -4.330625

1b-C17,  $\Delta G = 1.7614$  kcal/mol, population = 3.08 %

C 8.403202 0.395490 -3.214747  
C 7.756263 1.575782 -2.855055  
C 6.489083 1.855672 -3.351859  
C 5.846027 0.961696 -4.211639  
C 6.503894 -0.214813 -4.567693  
C 7.774802 -0.497239 -4.075499  
C 4.452185 1.246146 -4.710249  
C 3.373512 1.104981 -3.619976  
C 3.460351 -0.283639 -2.983886  
O 4.051275 -0.245910 -1.789383  
O 3.037738 -1.286147 -3.517319  
C 4.272707 -1.508967 -1.093808  
C 5.557499 -2.165301 -1.551913  
C -1.586316 0.765152 -3.041555  
C -1.388874 -0.115202 -1.805515  
C -2.757906 0.257546 -3.886575  
C -0.326449 0.830112 -3.912794  
C 0.946236 1.380957 -3.246801  
N 2.057813 1.341967 -4.206029  
C 0.741675 2.834882 -2.807785  
O 1.258654 3.730840 -3.656350  
O 0.148049 3.166049 -1.808103  
H 9.390585 0.176668 -2.828165  
H 8.241140 2.278999 -2.189405  
H 5.993397 2.777230 -3.069265  
H 6.015727 -0.918512 -5.231306  
H 8.269822 -1.417129 -4.360581  
H 4.204926 0.562925 -5.525432  
H 4.381125 2.262564 -5.101346  
H 3.549137 1.846695 -2.840645  
H 4.318498 -1.224108 -0.045414  
H 3.407929 -2.149607 -1.256928  
H 5.740829 -3.055602 -0.947123  
H 5.496991 -2.465402 -2.597259  
H 6.402751 -1.486716 -1.435044  
H -1.826113 1.776717 -2.704318  
H -2.321159 -0.200426 -1.243585  
H -1.078341 -1.123643 -2.094727  
H -0.634858 0.291335 -1.130384

H -2.923368 0.893370 -4.759246  
H -3.679328 0.240826 -3.301266  
H -2.568765 -0.759475 -4.242274  
H -0.086022 -0.182140 -4.254211  
H -0.532053 1.426382 -4.806612  
H 1.159134 0.803247 -2.344186  
H 1.878381 0.655280 -4.930205  
H 1.736384 3.184455 -4.332126

1b-C28,  $\Delta G = 1.8587$  kcal/mol, population = 2.61 %

C 5.367759 3.670700 -2.042716  
C 5.153381 2.536757 -1.262059  
C 4.954465 1.302103 -1.867462  
C 4.961229 1.177735 -3.260119  
C 5.194121 2.315658 -4.030359  
C 5.393610 3.555130 -3.427974  
C 4.667601 -0.154907 -3.901282  
C 3.184744 -0.557410 -3.751818  
C 2.939065 -1.983322 -4.232970  
O 3.777470 -2.846161 -3.666785  
O 2.065894 -2.291496 -5.015650  
C 3.626271 -4.252623 -4.019807  
C 4.672784 -5.025329 -3.254691  
C 0.072927 0.255575 -2.251033  
C -1.427869 0.047055 -2.033344  
C 0.768046 0.584885 -0.927982  
C 0.296687 1.344266 -3.308106  
C 1.751767 1.503349 -3.765201  
N 2.279567 0.332657 -4.478848  
C 1.888547 2.738832 -4.668478  
O 1.525625 3.848609 -4.349475  
O 2.444555 2.483998 -5.853327  
H 5.517593 4.634480 -1.572926  
H 5.141375 2.615313 -0.182134  
H 4.787204 0.425096 -1.252556  
H 5.208280 2.235587 -5.109907  
H 5.564165 4.429874 -4.042889  
H 4.913447 -0.128528 -4.964078  
H 5.275776 -0.930983 -3.436898  
H 2.950287 -0.571110 -2.681313  
H 2.614091 -4.562102 -3.759674  
H 3.751690 -4.347440 -5.098218  
H 4.587015 -6.085438 -3.498589  
H 5.676832 -4.692492 -3.520478

H 4.536216 -4.908985 -2.178882  
H 0.481847 -0.686340 -2.632367  
H -1.610276 -0.744331 -1.303562  
H -1.894259 0.962674 -1.658790  
H -1.927973 -0.228617 -2.964294  
H 1.847857 0.699816 -1.037065  
H 0.596318 -0.206294 -0.195591  
H 0.378104 1.518422 -0.512765  
H -0.315471 1.124893 -4.189173  
H -0.047459 2.304760 -2.918113  
H 2.385395 1.709931 -2.903218  
H 1.526914 -0.223921 -4.872003  
H 2.665607 1.513268 -5.804242

1b-C2,  $\Delta G = 1.9967$  kcal/mol, population = 2.07 %

C 5.706171 0.975310 -6.150660  
C 6.161048 -0.016355 -5.286225  
C 5.796511 0.006323 -3.944453  
C 4.970499 1.015264 -3.444153  
C 4.531261 2.012443 -4.318245  
C 4.892502 1.992694 -5.661547  
C 4.524945 1.003008 -2.003851  
C 3.201964 0.231405 -1.783122  
C 3.387344 -1.258603 -2.082539  
O 4.137384 -1.849366 -1.148004  
O 2.919662 -1.821267 -3.046366  
C 4.420348 -3.272306 -1.302146  
C 5.595633 -3.508839 -2.226699  
C -0.549706 1.153791 -4.385892  
C -1.553655 0.605837 -5.405141  
C 0.587675 1.883711 -5.108179  
C -0.080099 0.001825 -3.482720  
C 0.773521 0.351782 -2.250883  
N 2.130420 0.812229 -2.577908  
C 0.072653 1.432342 -1.415811  
O 0.726005 2.596189 -1.383221  
O -0.984711 1.266068 -0.852005  
H 5.989385 0.958939 -7.195499  
H 6.802518 -0.806630 -5.655880  
H 6.161185 -0.764959 -3.277818  
H 3.902116 2.809834 -3.942513  
H 4.540513 2.773351 -6.324296  
H 5.290565 0.552381 -1.372759  
H 4.361584 2.021697 -1.651320



H 2.943596 0.322030 -0.726760  
H 4.633802 -3.605867 -0.289548  
H 3.518712 -3.764867 -1.662081  
H 6.480216 -2.976267 -1.874574  
H 5.826400 -4.575648 -2.246526  
H 5.369197 -3.190415 -3.243775  
H -1.078755 1.882835 -3.762099  
H -2.397963 0.121175 -4.910490  
H -1.943967 1.407284 -6.035446  
H -1.077089 -0.131201 -6.057927  
H 1.199117 1.180826 -5.682049  
H 1.241755 2.420605 -4.422078  
H 0.181823 2.615403 -5.809490  
H -0.964584 -0.516215 -3.108339  
H 0.485879 -0.725265 -4.071658  
H 0.809545 -0.542373 -1.624161  
H 2.327662 0.675628 -3.560817  
H 1.555929 2.415450 -1.902937

1b-C12,  $\Delta G = 2.0243$  kcal/mol, population = 1.97 %

C 5.407522 4.040193 -3.801763  
C 6.059015 3.154064 -2.948230  
C 5.873864 1.783293 -3.091656  
C 5.038542 1.275960 -4.089013  
C 4.394633 2.172994 -4.943214  
C 4.575790 3.545674 -4.801588  
C 4.788789 -0.205474 -4.190514  
C 3.704223 -0.660988 -3.187124  
C 3.571077 -2.183216 -3.226773  
O 4.582824 -2.773567 -2.586641  
O 2.676135 -2.768544 -3.794716  
C 4.618782 -4.231670 -2.566834  
C 3.776343 -4.780333 -1.434600  
C -0.602593 1.096110 -3.581386  
C -2.105469 0.872426 -3.777728  
C 0.055086 1.460577 -4.916132  
C 0.002191 -0.144321 -2.903772  
C 1.451290 -0.051482 -2.392426  
N 2.444580 0.007100 -3.466436  
C 1.603861 1.191074 -1.505219  
O 1.079391 1.307907 -0.421568  
O 2.346733 2.163094 -2.041726  
H 5.548414 5.107679 -3.689075  
H 6.710710 3.530548 -2.169705

H 6.381217 1.099234 -2.420988  
 H 3.744673 1.793948 -5.722404  
 H 4.065833 4.227099 -5.470977  
 H 4.463337 -0.468448 -5.199454  
 H 5.703462 -0.761659 -3.984207  
 H 4.032750 -0.382840 -2.184150  
 H 4.284484 -4.598950 -3.535489  
 H 5.672219 -4.466813 -2.435028  
 H 3.878071 -5.866853 -1.403400  
 H 4.106924 -4.378165 -0.476031  
 H 2.722732 -4.539387 -1.575315  
 H -0.482858 1.946245 -2.900644  
 H -2.574518 1.752531 -4.221967  
 H -2.285303 0.024728 -4.445237  
 H -2.603836 0.664643 -2.828519  
 H 1.100701 1.743058 -4.801326  
 H -0.466318 2.301898 -5.377136  
 H 0.006081 0.618858 -5.613684  
 H -0.613425 -0.391284 -2.037307  
 H -0.053679 -1.002236 -3.580545  
 H 1.616540 -0.915774 -1.742110  
 H 2.058042 -0.334663 -4.337445  
 H 2.674120 1.797881 -2.903176

1b-C6,  $\Delta G = 2.1561$  kcal/mol, population = 1.58 %

C 8.146240 0.488818 -3.280851  
 C 7.540358 1.676970 -2.878675  
 C 6.252753 1.981998 -3.303787  
 C 5.549439 1.106615 -4.135079  
 C 6.166832 -0.078672 -4.533883  
 C 7.456812 -0.386791 -4.112272  
 C 4.133266 1.415988 -4.550182  
 C 3.120691 1.225099 -3.405854  
 C 3.258813 -0.190385 -2.845370  
 O 3.789990 -0.194603 -1.621928  
 O 2.919625 -1.180108 -3.456731  
 C 4.040954 -1.486689 -0.992261  
 C 5.374228 -2.054547 -1.429890  
 C -0.543159 -0.525312 -3.722852  
 C -1.446024 0.240184 -4.693280  
 C -1.254951 -1.772372 -3.191777  
 C -0.063767 0.326599 -2.539892  
 C 0.713887 1.606603 -2.885686  
 N 1.771335 1.482861 -3.900707

C -0.201403 2.781194 -3.276680  
O 0.279899 3.528354 -4.272774  
O -1.234766 3.049414 -2.709323  
H 9.149122 0.250357 -2.949740  
H 8.072846 2.366650 -2.235580  
H 5.788787 2.909382 -2.987858  
H 5.630230 -0.768437 -5.174231  
H 7.919848 -1.312627 -4.429982  
H 4.043601 2.449236 -4.889251  
H 3.840734 0.768473 -5.378832  
H 3.334652 1.936583 -2.609880  
H 4.027045 -1.265224 0.072196  
H 3.215815 -2.154287 -1.233677  
H 6.181573 -1.350496 -1.226130  
H 5.570692 -2.975643 -0.877755  
H 5.375205 -2.283159 -2.494649  
H 0.338149 -0.872899 -4.272095  
H -0.937157 1.085192 -5.161684  
H -1.781982 -0.417091 -5.497699  
H -2.329759 0.626908 -4.180494  
H -0.606943 -2.341208 -2.521399  
H -1.553349 -2.428960 -4.011492  
H -2.156009 -1.496906 -2.636589  
H -0.921635 0.623172 -1.932145  
H 0.569259 -0.293375 -1.901903  
H 1.190466 1.956588 -1.965472  
H 1.527213 0.779864 -4.591240  
H 1.122211 3.065912 -4.533352

1b-C15,  $\Delta G = 2.1969$  kcal/mol, population = 1.48 %

C 7.081803 2.141682 -4.813467  
C 6.144588 3.074468 -4.381797  
C 5.199743 2.722019 -3.422456  
C 5.170781 1.435600 -2.881562  
C 6.128846 0.512779 -3.311436  
C 7.074314 0.859816 -4.269993  
C 4.117714 1.043082 -1.878661  
C 2.920326 0.273694 -2.494921  
C 3.365689 -1.049032 -3.107383  
O 3.896426 -1.855345 -2.190021  
O 3.250146 -1.322751 -4.281994  
C 4.357808 -3.169357 -2.627474  
C 3.213429 -4.159151 -2.677298  
C -0.373268 -0.712910 -3.736238

C -1.374870 -1.313262 -4.726269  
 C -0.774171 -1.044628 -2.297434  
 C -0.256523 0.797982 -3.976515  
 C 0.839036 1.498392 -3.162532  
 N 2.197641 1.054570 -3.496969  
 C 0.744392 3.020361 -3.358897  
 O -0.254753 3.667350 -3.139378  
 O 1.875101 3.574937 -3.796165  
 H 7.818427 2.413411 -5.558948  
 H 6.149993 4.078436 -4.787648  
 H 4.490464 3.463611 -3.075755  
 H 6.143827 -0.482303 -2.884220  
 H 7.809174 0.130944 -4.588525  
 H 4.550140 0.417931 -1.096786  
 H 3.709144 1.932220 -1.397174  
 H 2.255697 0.016727 -1.666713  
 H 4.842470 -3.059537 -3.595898  
 H 5.098689 -3.446049 -1.881518  
 H 2.476924 -3.872552 -3.427623  
 H 3.602765 -5.145022 -2.938312  
 H 2.721574 -4.231449 -1.706454  
 H 0.600211 -1.169889 -3.936324  
 H -1.079394 -1.112505 -5.758400  
 H -1.447477 -2.395286 -4.599538  
 H -2.371589 -0.889830 -4.573047  
 H -0.875789 -2.123798 -2.167166  
 H -1.734156 -0.583668 -2.048190  
 H -0.040044 -0.698652 -1.567912  
 H -0.060472 0.980168 -5.038371  
 H -1.210459 1.278119 -3.747434  
 H 0.660456 1.336265 -2.097579  
 H 2.214099 0.553367 -4.379186  
 H 2.502787 2.801283 -3.861697

1b-C4,  $\Delta G = 2.3425$  kcal/mol, population = 1.15 %

C 5.282331 3.771759 -2.038686  
 C 5.347375 3.668875 -3.423558  
 C 5.210538 2.427591 -4.039656  
 C 5.002123 1.275028 -3.284330  
 C 4.955834 1.387589 -1.891275  
 C 5.091079 2.623990 -1.272288  
 C 4.777839 -0.061936 -3.944095  
 C 3.317313 -0.539894 -3.806145  
 C 3.136801 -1.968074 -4.308740

O 4.031483 -2.793949 -3.771342  
 O 2.263664 -2.304271 -5.079561  
 C 3.930274 -4.212645 -4.097447  
 C 2.941858 -4.907850 -3.185580  
 C 0.218674 0.080528 -2.245608  
 C -1.260040 -0.237648 -2.010758  
 C 0.905338 0.448601 -0.928372  
 C 0.350803 1.190874 -3.295967  
 C 1.784196 1.445818 -3.776354  
 N 2.370471 0.319678 -4.516936  
 C 1.836945 2.700466 -4.661058  
 O 1.396995 3.777828 -4.327924  
 O 2.417791 2.503017 -5.844957  
 H 5.383367 4.736573 -1.558110  
 H 5.499974 4.554398 -4.027669  
 H 5.254126 2.357108 -5.119163  
 H 4.805952 0.500359 -1.286511  
 H 5.047751 2.693270 -0.192553  
 H 5.025667 -0.007171 -5.005339  
 H 5.422843 -0.813321 -3.488886  
 H 3.080302 -0.585925 -2.736976  
 H 3.653135 -4.307758 -5.145500  
 H 4.941535 -4.585646 -3.955132  
 H 2.935434 -5.976105 -3.410249  
 H 3.223503 -4.779765 -2.139641  
 H 1.932781 -4.522087 -3.330802  
 H 0.689339 -0.826381 -2.640133  
 H -1.787270 0.639637 -1.625300  
 H -1.750114 -0.544645 -2.937162  
 H -1.375131 -1.043579 -1.283132  
 H 1.972292 0.643123 -1.049762  
 H 0.453580 1.347629 -0.499993  
 H 0.801736 -0.359180 -0.201304  
 H -0.261373 0.940085 -4.168658  
 H -0.047191 2.123592 -2.890243  
 H 2.420183 1.677081 -2.922365  
 H 1.644450 -0.265812 -4.918742  
 H 2.699047 1.546976 -5.811193

1b-C3,  $\Delta G = 2.5584$  kcal/mol, population = 0.80 %

C 5.823489 1.341764 -6.087806  
 C 4.952391 2.284266 -5.550394  
 C 4.554266 2.187849 -4.220830  
 C 5.014114 1.148044 -3.409570

C 5.896955 0.214025 -3.957317  
C 6.298379 0.308020 -5.285358  
C 4.526511 1.006964 -1.990080  
C 3.251863 0.136778 -1.874791  
C 3.548104 -1.301886 -2.303910  
O 4.347343 -1.912338 -1.424395  
O 3.132670 -1.806203 -3.322334  
C 4.750186 -3.284206 -1.711406  
C 3.703267 -4.270626 -1.238937  
C -0.473395 1.052662 -4.508344  
C -1.425000 0.542240 -5.595137  
C 0.637646 1.899471 -5.138623  
C 0.038286 -0.146498 -3.693506  
C 0.833115 0.140378 -2.407964  
N 2.163491 0.717833 -2.646570  
C 0.038654 1.088940 -1.499421  
O -1.020869 0.802542 -0.990495  
O 0.612544 2.282969 -1.334736  
H 6.135217 1.415180 -7.122027  
H 4.583623 3.096176 -6.164690  
H 3.879133 2.926613 -3.806703  
H 6.275535 -0.590986 -3.338587  
H 6.983731 -0.424501 -5.693218  
H 4.284329 1.985246 -1.574537  
H 5.299113 0.560729 -1.364619  
H 2.964041 0.113976 -0.822321  
H 4.936621 -3.372363 -2.780308  
H 5.686333 -3.401235 -1.170691  
H 4.065522 -5.287200 -1.403854  
H 3.507045 -4.146095 -0.173164  
H 2.769826 -4.146646 -1.787662  
H -1.053662 1.697795 -3.839199  
H -0.896670 -0.112619 -6.294090  
H -2.253253 -0.024122 -5.164270  
H -1.843040 1.373055 -6.166916  
H 1.301882 1.279510 -5.748323  
H 1.243519 2.415728 -4.394713  
H 0.207540 2.661307 -5.791735  
H -0.824022 -0.745091 -3.395317  
H 0.662857 -0.785123 -4.323957  
H 0.913532 -0.805089 -1.866436  
H 2.395054 0.688348 -3.631062  
H 1.466282 2.205765 -1.841967

1b-C7,  $\Delta G = 2.5935$  kcal/mol, population = 0.75 %

C 5.367414 3.762736 -2.181086  
C 5.147893 2.688547 -1.321307  
C 4.956299 1.412337 -1.835923  
C 4.974707 1.186460 -3.215797  
C 5.212013 2.265637 -4.065214  
C 5.404947 3.546382 -3.553891  
C 4.687418 -0.189000 -3.761558  
C 3.203921 -0.582933 -3.592333  
C 2.968759 -2.035861 -3.989907  
O 3.787208 -2.858686 -3.337879  
O 2.122041 -2.389655 -4.781848  
C 3.693791 -4.285457 -3.628279  
C 4.519768 -4.645043 -4.844921  
C 0.105609 0.288131 -2.135807  
C -1.391004 0.069176 -1.900477  
C 0.798622 0.710579 -0.838142  
C 0.308883 1.313389 -3.258531  
C 1.759687 1.463459 -3.731630  
N 2.302154 0.260228 -4.377284  
C 1.880735 2.646635 -4.704158  
O 1.495151 3.766084 -4.452487  
O 2.451778 2.334704 -5.868158  
H 5.511787 4.758575 -1.781715  
H 5.125894 2.846394 -0.250254  
H 4.784899 0.582673 -1.159511  
H 5.234481 2.106930 -5.135833  
H 5.579260 4.374021 -4.229871  
H 4.938736 -0.237276 -4.822319  
H 5.294102 -0.929199 -3.240198  
H 2.964324 -0.530338 -2.524609  
H 4.075502 -4.759864 -2.727581  
H 2.644871 -4.545073 -3.757850  
H 4.486223 -5.725639 -4.996072  
H 4.131168 -4.162418 -5.741699  
H 5.560844 -4.350610 -4.706515  
H 0.529254 -0.668554 -2.459852  
H -1.559146 -0.673151 -1.117621  
H -1.872753 1.000362 -1.589123  
H -1.887131 -0.278342 -2.809261  
H 1.875353 0.841026 -0.959558  
H 0.645955 -0.038213 -0.058535  
H 0.390598 1.659371 -0.478743  
H -0.304715 1.033718 -4.121299

H -0.045751 2.290982 -2.924764  
H 2.394444 1.726281 -2.885678  
H 1.557238 -0.321355 -4.748284  
H 2.688004 1.372162 -5.763494

1b-C21,  $\Delta G = 2.7209$  kcal/mol, population = 0.61 %

C 5.730139 0.616577 -6.069309  
C 6.280749 -0.057869 -4.983296  
C 5.900522 0.276195 -3.688403  
C 4.964035 1.285551 -3.455868  
C 4.429543 1.966252 -4.552702  
C 4.805607 1.633267 -5.850075  
C 4.498220 1.593801 -2.055563  
C 3.263686 0.761683 -1.635108  
C 3.656027 -0.715681 -1.518555  
O 3.128179 -1.464307 -2.488228  
O 4.379652 -1.134130 -0.641992  
C 3.419862 -2.892284 -2.491581  
C 4.712537 -3.189724 -3.220604  
C -0.517326 0.668919 -4.359226  
C -1.401004 -0.197773 -5.261873  
C 0.530844 1.405974 -5.199313  
C 0.075021 -0.214638 -3.249465  
C 0.844862 0.476629 -2.110851  
N 2.140967 1.034119 -2.522139  
C -0.008267 1.598181 -1.502103  
O -1.055458 1.408911 -0.926660  
O 0.499104 2.819557 -1.682537  
H 6.024278 0.356223 -7.078197  
H 7.006208 -0.845400 -5.144332  
H 6.334368 -0.251836 -2.847990  
H 3.713042 2.761690 -4.388096  
H 4.377951 2.169267 -6.688122  
H 5.295327 1.400025 -1.337995  
H 4.220962 2.644800 -1.970006  
H 2.991104 1.072227 -0.624801  
H 3.447057 -3.240293 -1.460612  
H 2.563552 -3.330804 -2.998584  
H 4.848007 -4.271408 -3.279391  
H 4.688022 -2.789698 -4.234440  
H 5.568327 -2.765404 -2.697014  
H -1.162617 1.418937 -3.888471  
H -0.805236 -0.967936 -5.760322  
H -2.184970 -0.697430 -4.689016



H -1.878650 0.407376 -6.034819  
H 1.076584 2.153110 -4.624014  
H 0.051061 1.924664 -6.031592  
H 1.256782 0.705105 -5.622522  
H -0.744489 -0.762342 -2.781364  
H 0.743851 -0.961108 -3.686205  
H 0.978206 -0.265310 -1.320004  
H 2.373085 0.752571 -3.465415  
H 1.359889 2.649567 -2.153677

1b-C29,  $\Delta G = 2.7472$  kcal/mol, population = 0.58 %

C 5.106826 4.031754 -2.089140  
C 5.042799 2.899971 -1.279034  
C 5.031291 1.633632 -1.850644  
C 5.074714 1.474189 -3.239137  
C 5.155901 2.613127 -4.038641  
C 5.170033 3.884113 -3.470096  
C 4.990125 0.098009 -3.848516  
C 3.598709 -0.542168 -3.685458  
C 3.661414 -2.025698 -4.045148  
O 2.565007 -2.444754 -4.684182  
O 4.586986 -2.741354 -3.739023  
C 2.443744 -3.867330 -4.983382  
C 1.863427 -4.615305 -3.802362  
C 0.439498 -0.082668 -2.144570  
C -1.007692 -0.506818 -1.882683  
C 1.089507 0.436710 -0.859901  
C 0.480838 0.956664 -3.272127  
C 1.889666 1.290687 -3.776928  
N 2.556682 0.159639 -4.442833  
C 1.842071 2.479159 -4.748147  
O 2.414600 2.236231 -5.927849  
O 1.334970 3.545453 -4.482068  
H 5.112094 5.019219 -1.645384  
H 5.002624 3.004952 -0.202045  
H 4.983248 0.758898 -1.212184  
H 5.195860 2.506577 -5.115353  
H 5.225132 4.757288 -4.108024  
H 5.227408 0.140247 -4.912633  
H 5.713598 -0.564556 -3.373286  
H 3.356571 -0.549920 -2.614726  
H 1.782775 -3.897670 -5.845984  
H 3.424931 -4.244996 -5.263627  
H 1.717888 -5.662037 -4.075657

H 2.533904 -4.576509 -2.943819  
H 0.897041 -4.197647 -3.517157  
H 0.985407 -0.972898 -2.474159  
H -1.056694 -1.263738 -1.097247  
H -1.609126 0.348583 -1.562229  
H -1.466408 -0.922357 -2.782513  
H 2.133683 0.720466 -1.001523  
H 1.060824 -0.325341 -0.078722  
H 0.556379 1.317407 -0.491159  
H -0.109037 0.595598 -4.121342  
H 0.008015 1.880711 -2.932239  
H 2.506486 1.629417 -2.945352  
H 1.866865 -0.512218 -4.757272  
H 2.759740 1.305556 -5.833327

1b-C46,  $\Delta G = 2.7692$  kcal/mol, population = 0.56 %

C 5.087732 4.130553 -2.207104  
C 5.078630 3.033329 -1.348521  
C 5.081887 1.743786 -1.865847  
C 5.087225 1.525917 -3.247141  
C 5.115292 2.631299 -4.095942  
C 5.113123 3.925385 -3.581879  
C 5.020321 0.122962 -3.794842  
C 3.659754 -0.553893 -3.545830  
C 3.763420 -2.051171 -3.835184  
O 2.648971 -2.546511 -4.377744  
O 4.733567 -2.718026 -3.557578  
C 2.604367 -3.979133 -4.641045  
C 1.263213 -4.280419 -5.263955  
C 0.495628 -0.050024 -1.969116  
C -0.944089 -0.464592 -1.655593  
C 1.168237 0.543283 -0.728982  
C 0.508600 0.925712 -3.153049  
C 1.905348 1.235969 -3.704158  
N 2.567357 0.066116 -4.303732  
C 1.825367 2.353491 -4.754376  
O 2.364847 2.029103 -5.930140  
O 1.319640 3.433981 -4.550113  
H 5.080890 5.135981 -1.805705  
H 5.069019 3.183263 -0.276146  
H 5.075507 0.896475 -1.189676  
H 5.124870 2.480061 -5.168043  
H 5.125413 4.771496 -4.257429  
H 5.212076 0.126209 -4.869027

H 5.784808 -0.495451 -3.324163  
H 3.454832 -0.510971 -2.467955  
H 3.433051 -4.227878 -5.303355  
H 2.746698 -4.501189 -3.695081  
H 1.193380 -5.349954 -5.468259  
H 0.449797 -4.005709 -4.591289  
H 1.139465 -3.742852 -6.204830  
H 1.040411 -0.954801 -2.259768  
H -0.974406 -1.174013 -0.826158  
H -1.544339 0.405507 -1.374896  
H -1.416872 -0.934186 -2.520871  
H 0.642353 1.445455 -0.404442  
H 2.210139 0.815513 -0.905564  
H 1.152539 -0.170749 0.096717  
H -0.097244 0.516622 -3.968502  
H 0.039596 1.865867 -2.854821  
H 2.532236 1.636541 -2.908464  
H 1.879495 -0.640931 -4.533240  
H 2.713384 1.106661 -5.780911

1b-C16,  $\Delta G = 2.9298$  kcal/mol, population = 0.43 %

C 5.124737 3.600309 -1.991892  
C 5.224406 3.440460 -3.369630  
C 5.151920 2.169099 -3.932375  
C 4.972004 1.043065 -3.130308  
C 4.891168 1.213457 -1.745068  
C 4.964248 2.480324 -1.179094  
C 4.794630 -0.324094 -3.737996  
C 3.321335 -0.789593 -3.696943  
C 3.181157 -2.212231 -4.224011  
O 3.980785 -3.054697 -3.572531  
O 2.418692 -2.531478 -5.110465  
C 3.971707 -4.455346 -3.980745  
C 4.901458 -4.684321 -5.153289  
C -0.127655 1.683112 -2.018561  
C 0.843165 1.909986 -0.856740  
C -1.450692 1.103180 -1.511871  
C 0.459738 0.750233 -3.087152  
C 1.793756 1.172040 -3.718230  
N 2.441109 0.085424 -4.471499  
C 1.679596 2.393139 -4.639099  
O 1.088919 3.410616 -4.355280  
O 2.323454 2.252975 -5.801175  
H 5.175096 4.588560 -1.552787

H 5.354282 4.304690 -4.008880  
H 5.221334 2.052950 -5.006678  
H 4.756147 0.347839 -1.106760  
H 4.892821 2.595397 -0.104821  
H 5.124505 -0.320095 -4.778179  
H 5.395336 -1.055817 -3.198238  
H 3.006693 -0.831970 -2.646349  
H 4.304528 -4.987307 -3.092905  
H 2.947650 -4.742203 -4.212247  
H 4.923930 -5.749263 -5.392198  
H 4.561954 -4.143046 -6.036350  
H 5.916100 -4.366137 -4.910490  
H -0.331814 2.647644 -2.486572  
H 1.751700 2.426970 -1.169818  
H 0.374491 2.516857 -0.079235  
H 1.138964 0.958248 -0.404529  
H -1.290861 0.134627 -1.028449  
H -2.158621 0.956018 -2.330881  
H -1.914230 1.768941 -0.780843  
H 0.627349 -0.230422 -2.628568  
H -0.273410 0.598999 -3.885554  
H 2.480821 1.481941 -2.932293  
H 1.741307 -0.492399 -4.929492  
H 2.723469 1.342561 -5.743899

1b-C45,  $\Delta G = 3.0321$  kcal/mol, population = 0.36 %

C 7.132190 1.725754 -4.762676  
C 7.101882 0.637958 -3.893898  
C 6.132436 0.564832 -2.900169  
C 5.172794 1.571443 -2.759079  
C 5.224500 2.664391 -3.625623  
C 6.193649 2.742789 -4.621538  
C 4.086556 1.458757 -1.722828  
C 2.880889 0.590051 -2.177167  
C 3.344869 -0.853802 -2.339574  
O 3.401367 -1.237507 -3.617566  
O 3.665711 -1.547121 -1.400872  
C 3.866665 -2.587878 -3.911733  
C 2.723382 -3.578711 -3.856561  
C -0.179983 -0.905064 -3.518399  
C -0.957080 -1.789767 -4.495618  
C -0.782464 -0.990387 -2.114820  
C -0.132652 0.534387 -4.045468  
C 0.790551 1.473740 -3.260905

N 2.216489 1.137640 -3.361541  
 C 0.588480 2.927505 -3.724302  
 O 1.719935 3.536932 -4.079143  
 O -0.487437 3.480495 -3.760133  
 H 7.887474 1.784579 -5.536178  
 H 7.837162 -0.151605 -3.986968  
 H 6.124187 -0.280768 -2.222881  
 H 4.515004 3.474593 -3.508198  
 H 6.217569 3.600201 -5.282537  
 H 4.480149 1.026278 -0.801699  
 H 3.690669 2.445485 -1.480783  
 H 2.177593 0.575109 -1.343926  
 H 4.284826 -2.507858 -4.912002  
 H 4.656743 -2.838704 -3.206892  
 H 3.094134 -4.568840 -4.127970  
 H 2.299635 -3.635664 -2.853892  
 H 1.935576 -3.304748 -4.558875  
 H 0.842236 -1.287408 -3.476509  
 H -0.974442 -2.826425 -4.153188  
 H -1.992330 -1.449395 -4.587863  
 H -0.506532 -1.769907 -5.490437  
 H -0.806696 -2.026209 -1.770759  
 H -0.212993 -0.418076 -1.380268  
 H -1.807892 -0.610234 -2.111285  
 H 0.196626 0.528832 -5.089919  
 H -1.138932 0.958800 -4.037444  
 H 0.500737 1.471454 -2.208358  
 H 2.399322 0.553490 -4.167885  
 H 2.413106 2.833280 -3.931025

1b-C31,  $\Delta G = 3.0961$  kcal/mol, population = 0.32 %

C 5.683505 3.821248 -2.581428  
 C 5.410253 3.579902 -3.923314  
 C 5.163871 2.282433 -4.363557  
 C 5.179436 1.210883 -3.471926  
 C 5.469665 1.462703 -2.127784  
 C 5.718383 2.756020 -1.684143  
 C 4.830774 -0.182062 -3.927038  
 C 3.400044 -0.583529 -3.503201  
 C 3.092481 -2.021308 -3.902365  
 O 3.992354 -2.870503 -3.415224  
 O 2.134180 -2.347805 -4.569959  
 C 3.803837 -4.285470 -3.712572  
 C 4.933908 -5.040010 -3.055796

C -0.406809 0.187768 -2.825771  
 C -1.123492 0.916830 -3.965245  
 C -1.392148 -0.157399 -1.705788  
 C 0.770068 0.980771 -2.240825  
 C 1.890312 1.370986 -3.217183  
 N 2.384240 0.294527 -4.084895  
 C 1.547771 2.589389 -4.085418  
 O 1.956190 2.483455 -5.353121  
 O 1.001087 3.584123 -3.668298  
 H 5.872706 4.829872 -2.236504  
 H 5.386416 4.400724 -4.629108  
 H 4.950495 2.101917 -5.409715  
 H 5.493707 0.639707 -1.422620  
 H 5.939408 2.933902 -0.639085  
 H 4.897513 -0.249957 -5.014097  
 H 5.527486 -0.904126 -3.501277  
 H 3.351832 -0.564982 -2.408311  
 H 2.829815 -4.587082 -3.327597  
 H 3.802031 -4.408006 -4.795498  
 H 4.925311 -4.894196 -1.974953  
 H 4.820302 -6.106132 -3.258746  
 H 5.899469 -4.717541 -3.447231  
 H -0.021463 -0.759879 -3.218511  
 H -0.475383 1.089810 -4.826601  
 H -1.972889 0.327744 -4.316520  
 H -1.498376 1.887132 -3.631412  
 H -0.900183 -0.705431 -0.899186  
 H -2.210505 -0.773709 -2.083494  
 H -1.825213 0.751877 -1.279666  
 H 0.400224 1.898684 -1.778086  
 H 1.220093 0.388128 -1.440275  
 H 2.735683 1.721334 -2.621052  
 H 1.618849 -0.286170 -4.413976  
 H 2.386899 1.588891 -5.394341

1b-C18,  $\Delta G = 3.2392$  kcal/mol, population = 0.25 %

C 5.072959 3.640188 -1.903035  
 C 5.155386 3.583666 -3.290054  
 C 5.137138 2.353247 -3.941419  
 C 5.030654 1.165577 -3.219336  
 C 4.965429 1.233162 -1.824472  
 C 4.984480 2.458812 -1.170145  
 C 4.911934 -0.163294 -3.919686  
 C 3.463530 -0.700471 -3.895430

C 3.375670 -2.091956 -4.510293  
 O 4.245787 -2.929987 -3.950489  
 O 2.595168 -2.393374 -5.387358  
 C 4.241140 -4.317707 -4.401711  
 C 3.186274 -5.123074 -3.673396  
 C -0.066988 1.451887 -1.996026  
 C 0.904750 1.574375 -0.819351  
 C -1.378332 0.801436 -1.548310  
 C 0.532627 0.642800 -3.155146  
 C 1.836887 1.175211 -3.764304  
 N 2.532170 0.181732 -4.598831  
 C 1.646362 2.450494 -4.595070  
 O 2.295429 2.433850 -5.762591  
 O 0.993115 3.405957 -4.241396  
 H 5.081220 4.596122 -1.394959  
 H 5.229223 4.496615 -3.867476  
 H 5.192553 2.316755 -5.022177  
 H 4.885636 0.318598 -1.248081  
 H 4.926301 2.493697 -0.089459  
 H 5.226820 -0.071199 -4.960378  
 H 5.554408 -0.900205 -3.438190  
 H 3.165983 -0.826365 -2.846366  
 H 4.089867 -4.330697 -5.479424  
 H 5.244549 -4.668555 -4.173337  
 H 3.257929 -6.168641 -3.979026  
 H 3.336221 -5.071101 -2.594244  
 H 2.184044 -4.766060 -3.910020  
 H -0.288501 2.455439 -2.363487  
 H 1.805001 2.133455 -1.079556  
 H 0.429877 2.092465 0.016353  
 H 1.215222 0.585910 -0.466759  
 H -1.202014 -0.211051 -1.172608  
 H -2.089177 0.732703 -2.375064  
 H -1.846766 1.377964 -0.747863  
 H 0.744588 -0.368217 -2.790696  
 H -0.209810 0.537405 -3.951887  
 H 2.515824 1.464078 -2.963190  
 H 1.858103 -0.397095 -5.092836  
 H 2.745811 1.545489 -5.772378

1b-C53,  $\Delta G = 3.3170$  kcal/mol, population = 0.22 %

C 7.190180 2.325770 -4.020751  
 C 6.086111 3.064564 -3.606815  
 C 5.029444 2.434987 -2.956414

C 5.052443 1.060605 -2.712697  
C 6.174140 0.332317 -3.118807  
C 7.232973 0.957461 -3.768997  
C 3.885617 0.377591 -2.047818  
C 2.879403 -0.250586 -3.040844  
C 3.519051 -1.321421 -3.913401  
O 4.118621 -2.257040 -3.179735  
O 3.465659 -1.332636 -5.123546  
C 4.771502 -3.345651 -3.895752  
C 5.386633 -4.260199 -2.864592  
C -1.452502 0.851140 -2.772573  
C -1.194671 0.465092 -1.313901  
C -2.675781 0.108617 -3.315734  
C -0.236344 0.556669 -3.663171  
C 1.038067 1.363358 -3.371123  
N 2.258854 0.747976 -3.906789  
C 0.962707 2.807691 -3.887245  
O -0.008560 3.521092 -3.784319  
O 2.095229 3.236026 -4.452102  
H 8.014222 2.813238 -4.526301  
H 6.047599 4.131770 -3.786566  
H 4.181973 3.021664 -2.624080  
H 6.223506 -0.729851 -2.916080  
H 8.094222 0.376116 -4.074221  
H 4.232308 -0.411541 -1.381011  
H 3.335653 1.094360 -1.436046  
H 2.123785 -0.776759 -2.443053  
H 4.021688 -3.853718 -4.501841  
H 5.519622 -2.914301 -4.561040  
H 5.884293 -5.089264 -3.370179  
H 6.127192 -3.730899 -2.263808  
H 4.624180 -4.670843 -2.201650  
H -1.653496 1.923146 -2.818851  
H -0.371317 1.030225 -0.872771  
H -2.080333 0.653340 -0.703672  
H -0.951858 -0.598757 -1.233555  
H -3.559810 0.315405 -2.708871  
H -2.509412 -0.972828 -3.306249  
H -2.894779 0.405283 -4.343974  
H 0.019343 -0.502056 -3.551602  
H -0.505539 0.703091 -4.713173  
H 1.169428 1.461278 -2.290769  
H 2.080828 0.327237 -4.814491  
H 2.705118 2.450776 -4.411367



1b-C10,  $\Delta G = 3.4488$  kcal/mol, population = 0.18 %

C 8.244265 1.032163 -3.058269  
C 7.649130 0.064740 -3.861669  
C 6.354747 0.252150 -4.337579  
C 5.636696 1.404883 -4.016508  
C 6.244666 2.370939 -3.211826  
C 7.538288 2.188554 -2.736332  
C 4.211083 1.581290 -4.473045  
C 3.194184 1.182384 -3.386625  
C 3.443939 -0.270909 -2.985328  
O 3.974517 -0.374399 -1.766552  
O 3.195419 -1.207969 -3.712626  
C 4.306031 -1.711266 -1.284682  
C 3.090753 -2.401088 -0.701304  
C -0.325003 -0.810380 -3.920255  
C -1.293795 -0.038624 -4.819420  
C -0.926614 -2.156912 -3.509093  
C 0.083248 -0.033504 -2.661611  
C 0.760379 1.328309 -2.881984  
N 1.835608 1.378159 -3.884894  
C -0.240262 2.458467 -3.183383  
O -1.294996 2.596484 -2.608739  
O 0.188457 3.323168 -4.105562  
H 9.251814 0.888959 -2.688667  
H 8.192431 -0.835488 -4.120764  
H 5.895509 -0.505351 -4.961403  
H 5.700337 3.273130 -2.957132  
H 7.996659 2.949167 -2.116547  
H 4.012640 2.622016 -4.731900  
H 4.021629 0.974755 -5.360793  
H 3.334276 1.816702 -2.512668  
H 4.736977 -2.277346 -2.108596  
H 5.068685 -1.533799 -0.530485  
H 3.392901 -3.355546 -0.266190  
H 2.641497 -1.793569 0.085451  
H 2.342561 -2.597966 -1.468520  
H 0.580545 -1.029482 -4.495820  
H -0.860769 0.885324 -5.208013  
H -1.577259 -0.646430 -5.680915  
H -2.204187 0.223609 -4.275471  
H -1.172484 -2.757668 -4.386989  
H -1.845208 -2.010669 -2.933931  
H -0.230749 -2.729398 -2.892016

H -0.797055 0.139747 -2.038561  
H 0.760544 -0.656396 -2.074609  
H 1.197984 1.630917 -1.926268  
H 1.658181 0.720231 -4.637487  
H 1.066759 2.951049 -4.391558

1b-C30,  $\Delta G = 3.5348$  kcal/mol, population = 0.15 %

C 5.149797 4.074323 -2.249835  
C 5.048216 3.019915 -1.344731  
C 5.004451 1.709399 -1.803998  
C 5.054111 1.427805 -3.172720  
C 5.173314 2.489767 -4.067862  
C 5.218342 3.804703 -3.612018  
C 4.933850 0.006250 -3.659479  
C 3.525618 -0.580371 -3.449094  
C 3.553030 -2.090497 -3.684070  
O 2.438546 -2.537665 -4.270840  
O 4.466723 -2.798900 -3.329656  
C 2.324446 -3.968994 -4.529785  
C 2.983176 -4.334256 -5.842534  
C 0.374322 0.127882 -1.977403  
C -1.087346 -0.218274 -1.682714  
C 1.038011 0.750997 -0.747015  
C 0.452548 1.048545 -3.202391  
C 1.871795 1.287756 -3.729409  
N 2.507255 0.077257 -4.275247  
C 1.864154 2.374111 -4.815487  
O 1.378322 3.472490 -4.665283  
O 2.447024 2.001796 -5.955472  
H 5.178856 5.096323 -1.893943  
H 5.003624 3.219587 -0.281394  
H 4.924936 0.895456 -1.092409  
H 5.217518 2.289287 -5.130955  
H 5.301688 4.616968 -4.323135  
H 5.176320 -0.052005 -4.721724  
H 5.637909 -0.630639 -3.123731  
H 3.277391 -0.486924 -2.383995  
H 2.762930 -4.505652 -3.690831  
H 1.251816 -4.144616 -4.552841  
H 2.824840 -5.396008 -6.040656  
H 2.549862 -3.763981 -6.665147  
H 4.056687 -4.148856 -5.809048  
H 0.891175 -0.808404 -2.213538  
H -1.164065 -0.892526 -0.827318

H -1.658493 0.684869 -1.449866  
H -1.559753 -0.703118 -2.539769  
H 2.094842 0.971858 -0.905824  
H 0.970578 0.077444 0.109498  
H 0.541641 1.687797 -0.479180  
H -0.146661 0.623807 -4.014795  
H 0.008563 2.015893 -2.957578  
H 2.495567 1.690124 -2.932204  
H 1.799606 -0.600321 -4.532184  
H 2.763307 1.075350 -5.764151

1b-C9,  $\Delta G = 3.6797$  kcal/mol, population = 0.12 %

C 5.657586 3.888689 -2.697388  
C 5.404711 3.561494 -4.025046  
C 5.177176 2.236527 -4.387010  
C 5.192329 1.222833 -3.430184  
C 5.462102 1.560818 -2.100719  
C 5.691627 2.881668 -1.735105  
C 4.860751 -0.199280 -3.799237  
C 3.433425 -0.588886 -3.352753  
C 3.146857 -2.053932 -3.657866  
O 4.054214 -2.854643 -3.103539  
O 2.198199 -2.433545 -4.310496  
C 3.924960 -4.290440 -3.329617  
C 4.561249 -4.692701 -4.643071  
C -0.351823 0.184396 -2.673798  
C -1.103815 0.785773 -3.863464  
C -1.309452 -0.074918 -1.507637  
C 0.814088 1.057328 -2.189255  
C 1.910861 1.374044 -3.217446  
N 2.409318 0.234018 -3.996939  
C 1.536347 2.504934 -4.185019  
O 1.950455 2.301434 -5.439077  
O 0.965021 3.518030 -3.854087  
H 5.831243 4.918848 -2.413368  
H 5.381239 4.336813 -4.780524  
H 4.977467 1.989347 -5.422239  
H 5.483261 0.783323 -1.345399  
H 5.896105 3.126588 -0.700305  
H 4.930652 -0.334422 -4.879710  
H 5.564600 -0.885263 -3.328148  
H 3.380654 -0.496536 -2.261794  
H 4.438692 -4.734513 -2.480595  
H 2.869421 -4.553149 -3.292120

H 5.609905 -4.394134 -4.672620  
H 4.510789 -5.777998 -4.749475  
H 4.040334 -4.242185 -5.487881  
H 0.051349 -0.786796 -2.981540  
H -0.471691 0.897534 -4.746519  
H -1.940929 0.145023 -4.147676  
H -1.501169 1.772142 -3.612996  
H -0.789382 -0.529838 -0.661679  
H -2.117620 -0.744712 -1.808259  
H -1.758791 0.860536 -1.162698  
H 0.429199 2.008315 -1.813731  
H 1.288848 0.557945 -1.340706  
H 2.760364 1.788963 -2.670777  
H 1.647397 -0.375996 -4.277021  
H 2.396336 1.413630 -5.404169

1b-C14,  $\Delta G = 3.6860$  kcal/mol, population = 0.12 %

C 6.906929 2.369318 -4.589516  
C 5.898315 3.150262 -4.033967  
C 5.018891 2.597889 -3.107839  
C 5.126491 1.260282 -2.723503  
C 6.154669 0.491057 -3.275373  
C 7.035421 1.038402 -4.202319  
C 4.137312 0.656295 -1.760850  
C 2.990079 -0.116765 -2.453746  
C 3.493445 -1.308182 -3.256723  
O 4.227449 -2.126483 -2.504305  
O 3.236237 -1.492156 -4.426253  
C 4.753955 -3.335834 -3.128371  
C 3.731056 -4.451490 -3.103323  
C -0.632254 -0.205565 -3.957668  
C -0.846765 0.734082 -5.146667  
C -1.885292 -1.048498 -3.705323  
C -0.243289 0.527116 -2.666277  
C 1.034464 1.379157 -2.722128  
N 2.201842 0.740999 -3.334317  
C 0.824363 2.754401 -3.374228  
O 1.849021 3.152266 -4.133920  
O -0.145709 3.451356 -3.188124  
H 7.592427 2.795957 -5.310845  
H 5.795842 4.189901 -4.319252  
H 4.244702 3.216943 -2.671621  
H 6.272307 -0.541286 -2.971509  
H 7.825507 0.425957 -4.618897

H 4.635699 -0.026941 -1.073382  
H 3.679538 1.442480 -1.158721  
H 2.366323 -0.547838 -1.660940  
H 5.065687 -3.093420 -4.142628  
H 5.628579 -3.577793 -2.529458  
H 2.860300 -4.202128 -3.709452  
H 4.180861 -5.360134 -3.508010  
H 3.406398 -4.655990 -2.082299  
H 0.175239 -0.900679 -4.214365  
H -1.624292 1.468915 -4.925489  
H 0.057906 1.280961 -5.420008  
H -1.156108 0.167676 -6.027248  
H -2.149182 -1.628351 -4.591974  
H -2.737006 -0.409556 -3.455989  
H -1.733846 -1.744978 -2.877735  
H -1.063000 1.176889 -2.351244  
H -0.113540 -0.215864 -1.875499  
H 1.303601 1.632426 -1.691976  
H 1.943397 0.208199 -4.158179  
H 2.495468 2.397714 -4.094076

1b-C49,  $\Delta G = 3.7475$  kcal/mol, population = 0.11 %

C 5.803839 3.543731 -2.173804  
C 5.690972 3.494134 -3.558173  
C 5.299387 2.314546 -4.185999  
C 5.014039 1.170313 -3.443304  
C 5.144520 1.227617 -2.052195  
C 5.532077 2.403051 -1.421283  
C 4.578614 -0.108483 -4.117187  
C 3.159863 -0.564832 -3.715060  
C 2.887550 -1.988125 -4.190853  
O 3.808713 -2.837598 -3.744236  
O 1.934693 -2.306358 -4.868616  
C 3.652601 -4.241580 -4.104042  
C 4.785764 -5.001433 -3.458788  
C -0.113447 0.692382 -1.790903  
C 0.063258 -0.817784 -1.968746  
C -1.559186 1.008795 -1.395316  
C 0.257356 1.519488 -3.030382  
C 1.733022 1.487966 -3.462205  
N 2.103162 0.297012 -4.238568  
C 2.021742 2.738515 -4.314316  
O 1.920321 3.871476 -3.901063  
O 2.365110 2.463113 -5.572061

H 6.103274 4.461116 -1.682996  
 H 5.901420 4.374289 -4.152707  
 H 5.203239 2.287462 -5.263930  
 H 4.942113 0.345360 -1.455957  
 H 5.625103 2.429440 -0.342718  
 H 4.610344 0.006975 -5.201732  
 H 5.270697 -0.908234 -3.852025  
 H 3.122251 -0.609599 -2.619713  
 H 2.677876 -4.577613 -3.750757  
 H 3.672771 -4.317778 -5.191079  
 H 4.699599 -6.059433 -3.711507  
 H 5.751479 -4.641207 -3.815412  
 H 4.752830 -4.904674 -2.372906  
 H 0.540056 1.018176 -0.973686  
 H 1.107763 -1.107018 -2.072185  
 H -0.330244 -1.348901 -1.099687  
 H -0.477619 -1.175725 -2.849183  
 H -1.699792 2.077937 -1.223352  
 H -1.838132 0.478353 -0.482685  
 H -2.250707 0.701151 -2.185063  
 H -0.362893 1.212191 -3.880625  
 H 0.005708 2.560911 -2.824963  
 H 2.366225 1.573982 -2.576997  
 H 1.295190 -0.268977 -4.468467  
 H 2.405966 1.465884 -5.585735

1b-C43,  $\Delta G = 3.8667$  kcal/mol, population = 0.09 %

C 7.225548 1.796712 -4.330543  
 C 7.148355 0.666642 -3.521344  
 C 6.047720 0.472201 -2.694448  
 C 4.999598 1.397019 -2.665736  
 C 5.099564 2.536523 -3.465771  
 C 6.199744 2.735711 -4.294566  
 C 3.784916 1.157579 -1.806225  
 C 2.734906 0.210022 -2.437906  
 C 3.337783 -1.173017 -2.653788  
 O 3.288812 -1.572292 -3.925770  
 O 3.796344 -1.829528 -1.746302  
 C 3.834985 -2.883569 -4.260062  
 C 5.326851 -2.805309 -4.502507  
 C -0.688246 -0.462880 -3.093472  
 C -1.806147 -1.251928 -3.779671  
 C -1.075896 -0.122239 -1.652992  
 C -0.360957 0.790409 -3.915572

C 0.904572 1.540656 -3.478911  
 N 2.137331 0.763128 -3.656490  
 C 1.019126 2.859123 -4.259725  
 O 0.145487 3.695580 -4.298803  
 O 2.178309 3.008257 -4.901298  
 H 8.082369 1.948961 -4.974710  
 H 7.947970 -0.063643 -3.530791  
 H 6.003122 -0.404243 -2.060971  
 H 4.315996 3.282594 -3.433352  
 H 6.255935 3.626395 -4.907995  
 H 4.077204 0.725606 -0.848473  
 H 3.281999 2.102146 -1.593840  
 H 1.966494 0.047327 -1.675409  
 H 3.588530 -3.573560 -3.455431  
 H 3.294578 -3.167203 -5.159755  
 H 5.682819 -3.775874 -4.853154  
 H 5.556707 -2.058716 -5.263399  
 H 5.863800 -2.552360 -3.589460  
 H 0.198819 -1.105219 -3.070365  
 H -2.719004 -0.652907 -3.842402  
 H -1.521942 -1.539109 -4.794306  
 H -2.040150 -2.161585 -3.223020  
 H -0.285609 0.409765 -1.120315  
 H -1.295412 -1.030322 -1.088254  
 H -1.968680 0.508949 -1.636444  
 H -0.236873 0.511175 -4.967334  
 H -1.204041 1.483251 -3.873507  
 H 0.817468 1.833913 -2.430399  
 H 2.001482 0.026513 -4.337842  
 H 2.694679 2.190944 -4.660472

1b-C8,  $\Delta G = 3.8868$  kcal/mol, population = 0.08 %

C 5.590219 3.943367 -2.573850  
 C 5.689836 2.872409 -1.688237  
 C 5.513929 1.571708 -2.144963  
 C 5.233220 1.318144 -3.490810  
 C 5.152720 2.396449 -4.370644  
 C 5.326114 3.701134 -3.917448  
 C 4.954995 -0.085953 -3.959843  
 C 3.543301 -0.558819 -3.544771  
 C 3.299242 -2.001312 -3.969907  
 O 4.243246 -2.815765 -3.504141  
 O 2.353419 -2.354667 -4.641247  
 C 4.120719 -4.239224 -3.802378

C 3.210210 -4.927793 -2.808116  
 C -0.286914 0.007269 -2.844537  
 C -1.038434 0.715873 -3.973720  
 C -1.251655 -0.404498 -1.729436  
 C 0.848897 0.850607 -2.248432  
 C 1.943850 1.316142 -3.220318  
 N 2.489157 0.283732 -4.110704  
 C 1.538262 2.532863 -4.063460  
 O 1.956091 2.476478 -5.331313  
 O 0.937849 3.487755 -3.627513  
 H 5.722075 4.957418 -2.218321  
 H 5.903686 3.051694 -0.641929  
 H 5.586408 0.743897 -1.448815  
 H 4.944531 2.214931 -5.417613  
 H 5.251873 4.526754 -4.614024  
 H 5.028887 -0.140382 -5.047295  
 H 5.684076 -0.777659 -3.538012  
 H 3.494480 -0.561950 -2.449751  
 H 3.762462 -4.348034 -4.824300  
 H 5.141454 -4.607553 -3.735825  
 H 3.197335 -5.999478 -3.015705  
 H 3.568801 -4.781202 -1.788481  
 H 2.189404 -4.553253 -2.882557  
 H 0.146535 -0.913532 -3.250483  
 H -0.399358 0.930066 -4.832615  
 H -1.859179 0.092183 -4.333253  
 H -1.458194 1.663219 -3.627619  
 H -0.730468 -0.938795 -0.931966  
 H -2.038023 -1.056494 -2.114984  
 H -1.729962 0.474559 -1.288287  
 H 0.432852 1.739588 -1.768493  
 H 1.331795 0.268394 -1.459596  
 H 2.772514 1.696522 -2.619249  
 H 1.751324 -0.323828 -4.453872  
 H 2.433585 1.606914 -5.390253

1b-C32,  $\Delta G = 3.9188$  kcal/mol, population = 0.08 %

C 7.131524 2.299829 -4.017945  
 C 7.181904 0.935081 -3.748327  
 C 6.136085 0.317968 -3.070456  
 C 5.020222 1.048390 -2.655312  
 C 4.989756 2.419263 -2.916291  
 C 6.033547 3.041941 -3.593716  
 C 3.866683 0.369120 -1.964354



C 2.859717 -0.296373 -2.930926  
 C 3.469020 -1.439225 -3.733496  
 O 4.025704 -2.353258 -2.938368  
 O 3.406939 -1.524595 -4.940150  
 C 4.566538 -3.556954 -3.563184  
 C 5.991716 -3.353159 -4.030769  
 C -1.448152 0.921203 -2.754067  
 C -1.195681 0.680314 -1.263696  
 C -2.673908 0.134416 -3.224607  
 C -0.232925 0.536722 -3.610865  
 C 1.056752 1.335842 -3.370306  
 N 2.266337 0.662473 -3.859463  
 C 1.012276 2.744211 -3.980932  
 O 2.157931 3.115585 -4.559325  
 O 0.053221 3.479859 -3.935231  
 H 7.944829 2.782049 -4.545419  
 H 8.037968 0.350381 -4.061684  
 H 6.190130 -0.740145 -2.853960  
 H 4.145809 3.008345 -2.579525  
 H 5.989138 4.106409 -3.787764  
 H 4.226751 -0.397444 -1.278352  
 H 3.313537 1.095986 -1.367640  
 H 2.088266 -0.770602 -2.309849  
 H 4.506197 -4.305808 -2.777230  
 H 3.910820 -3.840481 -4.384187  
 H 6.641446 -3.075826 -3.199836  
 H 6.363490 -4.288849 -4.452731  
 H 6.050562 -2.584436 -4.800878  
 H -1.644480 1.984375 -2.905222  
 H -0.373406 1.285521 -0.877239  
 H -2.083535 0.929960 -0.679184  
 H -0.955857 -0.370542 -1.075918  
 H -2.884481 0.322862 -4.279783  
 H -3.559949 0.410294 -2.648939  
 H -2.515983 -0.941175 -3.100261  
 H 0.000043 -0.516163 -3.419848  
 H -0.492626 0.610046 -4.670968  
 H 1.188835 1.502645 -2.298566  
 H 2.083081 0.190620 -4.740470  
 H 2.754097 2.325041 -4.461419

1b-C41,  $\Delta G = 4.0487$  kcal/mol, population = 0.06 %

C 4.971870 3.911446 -2.138492  
 C 5.060356 3.672869 -3.505602

C 5.113380 2.366848 -3.985009  
C 5.071448 1.282955 -3.109092  
C 5.001212 1.534432 -1.735729  
C 4.949158 2.836247 -1.252827  
C 5.036033 -0.131646 -3.625757  
C 3.641310 -0.778305 -3.496156  
C 3.740811 -2.263763 -3.836522  
O 2.726775 -2.691300 -4.594178  
O 4.631192 -2.973230 -3.427313  
C 2.702758 -4.098590 -4.978413  
C 3.530881 -4.332183 -6.223671  
C -0.013181 1.521468 -1.940885  
C 0.951803 1.910509 -0.817865  
C -1.286164 0.893726 -1.366907  
C 0.628380 0.545662 -2.937757  
C 1.915705 1.011386 -3.631823  
N 2.629465 -0.089855 -4.304252  
C 1.688852 2.131506 -4.655097  
O 2.296183 1.921690 -5.825982  
O 1.042274 3.131971 -4.440726  
H 4.924143 4.926065 -1.764022  
H 5.083214 4.502067 -4.201532  
H 5.172424 2.188322 -5.051401  
H 4.972966 0.703159 -1.040599  
H 4.886990 3.012998 -0.186369  
H 5.325855 -0.154676 -4.677530  
H 5.740094 -0.752460 -3.071660  
H 3.356540 -0.767448 -2.434975  
H 3.057128 -4.690433 -4.136834  
H 1.649009 -4.304451 -5.149265  
H 3.441089 -5.377892 -6.523847  
H 3.178212 -3.708353 -7.045952  
H 4.583954 -4.117745 -6.042035  
H -0.291071 2.427231 -2.482578  
H 1.814162 2.468539 -1.186026  
H 0.447765 2.538602 -0.080426  
H 1.324661 1.020997 -0.300834  
H -1.053135 -0.017872 -0.808374  
H -1.990538 0.630221 -2.159410  
H -1.788211 1.583708 -0.685441  
H 0.879506 -0.374396 -2.398676  
H -0.104058 0.268855 -3.702321  
H 2.585663 1.441234 -2.889533  
H 1.959365 -0.772006 -4.641506

H 2.756702 1.046625 -5.700321

1b-C13,  $\Delta G = 4.0625$  kcal/mol, population = 0.06 %

C 6.889640 2.105181 -4.637999  
C 6.967945 0.792652 -4.181202  
C 6.069673 0.330938 -3.225062  
C 5.074446 1.166824 -2.713494  
C 5.017880 2.486009 -3.166418  
C 5.914727 2.953598 -4.121987  
C 4.066188 0.649795 -1.721021  
C 2.875359 -0.092449 -2.372710  
C 3.292939 -1.367338 -3.095734  
O 3.957807 -2.193662 -2.289203  
O 3.009967 -1.611305 -4.248411  
C 4.339828 -3.499377 -2.819973  
C 5.654863 -3.437782 -3.566888  
C -0.735564 -0.091964 -3.902495  
C -0.893946 0.789031 -5.144112  
C -2.032234 -0.852885 -3.613048  
C -0.316778 0.691837 -2.650522  
C 0.999109 1.480308 -2.745674  
N 2.140301 0.754964 -3.308337  
C 0.854527 2.822175 -3.479593  
O 1.900614 3.130027 -4.252004  
O -0.085183 3.570349 -3.343626  
H 7.588179 2.466248 -5.382256  
H 7.731554 0.128038 -4.566013  
H 6.146664 -0.686493 -2.866594  
H 4.270873 3.157118 -2.760915  
H 5.852371 3.980094 -4.461318  
H 4.537196 -0.028863 -1.010009  
H 3.653523 1.480843 -1.146718  
H 2.225409 -0.431422 -1.556615  
H 4.410751 -4.126813 -1.934904  
H 3.532640 -3.859532 -3.454984  
H 5.916670 -4.441556 -3.906940  
H 5.584979 -2.788996 -4.439496  
H 6.456953 -3.080354 -2.920145  
H 0.036700 -0.840433 -4.112654  
H 0.040286 1.270388 -5.439854  
H -1.228314 0.190662 -5.993891  
H -1.631952 1.575567 -4.970908  
H -1.921619 -1.507363 -2.745658  
H -2.321690 -1.468443 -4.467058

H -2.850146 -0.156774 -3.407349  
H -1.106334 1.395567 -2.377118  
H -0.224464 -0.011811 -1.819571  
H 1.273613 1.781165 -1.729835  
H 1.862953 0.189448 -4.104007  
H 2.514313 2.353225 -4.162060

1b-C50,  $\Delta G = 4.1315$  kcal/mol, population = 0.06 %

C 7.179104 2.125392 -4.024688  
C 6.069225 2.931080 -3.790520  
C 5.002320 2.447855 -3.039264  
C 5.021105 1.154705 -2.514208  
C 6.150260 0.362593 -2.739273  
C 7.218155 0.840461 -3.490918  
C 3.840551 0.617750 -1.746890  
C 2.884150 -0.251839 -2.598849  
C 3.601076 -1.513549 -3.063441  
O 3.598987 -1.658674 -4.389136  
O 4.101565 -2.297763 -2.288799  
C 4.255277 -2.832945 -4.954307  
C 5.740938 -2.598321 -5.124297  
C -1.440713 0.995167 -2.761913  
C -1.240993 1.059220 -1.245717  
C -2.656064 0.131378 -3.108515  
C -0.200722 0.443390 -3.479785  
C 1.090969 1.265966 -3.360259  
N 2.298116 0.502243 -3.708216  
C 1.070544 2.544594 -4.211014  
O 2.217480 2.780573 -4.853737  
O 0.127507 3.298003 -4.291072  
H 8.010370 2.498525 -4.609531  
H 6.033327 3.936973 -4.190055  
H 4.148956 3.087817 -2.853171  
H 6.194693 -0.634304 -2.320013  
H 8.082721 0.209658 -3.656366  
H 4.173309 0.007920 -0.906623  
H 3.259284 1.442822 -1.333102  
H 2.102117 -0.621730 -1.923203  
H 4.049331 -3.685951 -4.310625  
H 3.757695 -2.972023 -5.910911  
H 6.179820 -3.452156 -5.643960  
H 5.926208 -1.702117 -5.717305  
H 6.237656 -2.491192 -4.160976  
H -1.622475 2.006390 -3.130259

H -0.429624 1.731785 -0.961128  
H -2.147080 1.419080 -0.754027  
H -1.012510 0.068042 -0.842559  
H -3.559050 0.518404 -2.631802  
H -2.512304 -0.897961 -2.766375  
H -2.828184 0.105151 -4.187000  
H 0.014473 -0.550340 -3.072879  
H -0.423725 0.303385 -4.541605  
H 1.207494 1.615110 -2.331885  
H 2.100105 -0.127773 -4.477705  
H 2.799712 2.010236 -4.612098

1b-C48,  $\Delta G = 4.2614$  kcal/mol, population = 0.05 %

C 5.463267 3.583139 -1.993076  
C 5.162097 2.445025 -1.247850  
C 4.886467 1.244412 -1.890063  
C 4.899631 1.159071 -3.285771  
C 5.216068 2.300405 -4.020216  
C 5.494966 3.505415 -3.380484  
C 4.557944 -0.141409 -3.970978  
C 3.092885 -0.576590 -3.749948  
C 2.868063 -2.005653 -4.232058  
O 3.709295 -2.855805 -3.649448  
O 2.011056 -2.327290 -5.026072  
C 3.582717 -4.265130 -3.999987  
C 4.605596 -5.024926 -3.191215  
C -0.240790 0.695478 -2.150826  
C 0.494196 1.102896 -0.871557  
C -0.174044 -0.818828 -2.368221  
C 0.197167 1.533572 -3.364847  
C 1.688627 1.509034 -3.737698  
N 2.125428 0.285468 -4.424411  
C 1.994363 2.715335 -4.645827  
O 1.797986 3.865822 -4.325103  
O 2.484117 2.379257 -5.838584  
H 5.674343 4.520401 -1.494018  
H 5.143508 2.493461 -0.166247  
H 4.655771 0.364789 -1.300089  
H 5.232144 2.251076 -5.101494  
H 5.730488 4.383395 -3.968749  
H 4.738289 -0.063224 -5.044222  
H 5.199662 -0.934073 -3.585692  
H 2.915012 -0.601882 -2.668151  
H 2.563930 -4.581521 -3.776851

H 3.749851 -4.364767 -5.072391  
H 4.538472 -6.086969 -3.432484  
H 5.616288 -4.684532 -3.419623  
H 4.426401 -4.904374 -2.122126  
H -1.297480 0.947603 -2.011626  
H 0.439819 2.181509 -0.708355  
H 0.055894 0.606798 -0.003344  
H 1.550231 0.823515 -0.903934  
H -0.699437 -1.338472 -1.564412  
H 0.852459 -1.186214 -2.364279  
H -0.636288 -1.111201 -3.313449  
H -0.382475 1.234280 -4.244416  
H -0.060498 2.574451 -3.163454  
H 2.290484 1.663160 -2.842189  
H 1.338583 -0.273792 -4.732241  
H 2.563117 1.385257 -5.781733

1b-C44,  $\Delta G = 4.2984$  kcal/mol, population = 0.04 %

C 4.916048 3.912071 -1.982031  
C 5.003968 3.787460 -3.364368  
C 5.097543 2.526763 -3.947479  
C 5.097262 1.374983 -3.161430  
C 5.026404 1.512710 -1.772256  
C 4.934307 2.769153 -1.185834  
C 5.109370 0.005936 -3.789960  
C 3.732335 -0.687044 -3.735823  
C 3.875065 -2.138489 -4.188098  
O 2.870763 -2.536747 -4.974347  
O 4.789422 -2.849524 -3.838986  
C 2.851252 -3.928897 -5.410494  
C 2.200645 -4.812996 -4.368352  
C 0.073171 1.300676 -1.939216  
C 1.050999 1.517849 -0.781524  
C -1.205655 0.620565 -1.443959  
C 0.695713 0.460766 -3.064256  
C 1.945542 1.041933 -3.740028  
N 2.712137 0.038124 -4.500225  
C 1.640236 2.219405 -4.674199  
O 0.908961 3.142337 -4.394924  
O 2.281892 2.157706 -5.844382  
H 4.838113 4.891169 -1.526770  
H 4.995796 4.670400 -3.991054  
H 5.157419 2.436698 -5.024978  
H 5.030583 0.627588 -1.146608

H 4.873310 2.857540 -0.108389  
H 5.414861 0.074751 -4.835343  
H 5.823181 -0.637311 -3.275608  
H 3.431966 -0.769658 -2.681816  
H 2.278578 -3.904483 -6.334276  
H 3.873202 -4.235682 -5.624127  
H 2.135096 -5.832539 -4.752885  
H 2.783844 -4.831978 -3.447774  
H 1.191340 -4.466688 -4.142400  
H -0.194040 2.275150 -2.352164  
H 1.932140 2.087325 -1.081125  
H 0.568127 2.067388 0.029132  
H 1.393462 0.559666 -0.378651  
H -0.985151 -0.367307 -1.028160  
H -1.684402 1.212687 -0.661127  
H -1.925060 0.489464 -2.255557  
H 0.983356 -0.508840 -2.643742  
H -0.057278 0.257114 -3.831512  
H 2.606292 1.455198 -2.979771  
H 2.073298 -0.632466 -4.913376  
H 2.801102 1.309629 -5.787380

1b-C34,  $\Delta G = 4.3706$  kcal/mol, population = 0.04 %

C 6.958875 1.975484 -4.570049  
C 7.057017 0.805859 -3.821647  
C 6.111718 0.520303 -2.842403  
C 5.047731 1.392965 -2.598205  
C 4.970865 2.570887 -3.343159  
C 5.914933 2.861624 -4.323051  
C 3.988973 1.058317 -1.579807  
C 2.897247 0.099204 -2.112932  
C 3.502744 -1.267468 -2.410839  
O 3.275956 -1.679054 -3.659578  
O 4.107280 -1.905626 -1.578772  
C 3.802591 -2.978478 -4.063008  
C 5.236666 -2.859653 -4.532256  
C -0.685825 -0.303987 -3.652768  
C -0.804044 0.198164 -5.093703  
C -1.999822 -0.942641 -3.194791  
C -0.279834 0.792442 -2.657958  
C 1.045357 1.517821 -2.941104  
N 2.188398 0.659287 -3.264712  
C 0.925736 2.607956 -4.017537  
O -0.010625 3.366745 -4.110901

O 1.988179 2.690819 -4.823648  
 H 7.694702 2.198331 -5.332406  
 H 7.872695 0.115563 -3.997647  
 H 6.202830 -0.386821 -2.258918  
 H 4.168575 3.272156 -3.150289  
 H 5.835229 3.780204 -4.891016  
 H 4.432760 0.591752 -0.699987  
 H 3.494432 1.970685 -1.243953  
 H 2.206544 -0.092066 -1.282347  
 H 3.704033 -3.664759 -3.224267  
 H 3.139749 -3.289554 -4.866648  
 H 5.896147 -2.564437 -3.717200  
 H 5.570498 -3.827600 -4.910760  
 H 5.321697 -2.128024 -5.336429  
 H 0.077497 -1.090338 -3.628438  
 H 0.143858 0.570389 -5.487673  
 H -1.128724 -0.610202 -5.751718  
 H -1.533882 1.007793 -5.164137  
 H -1.918257 -1.329739 -2.176739  
 H -2.279942 -1.769754 -3.850108  
 H -2.811432 -0.210015 -3.212269  
 H -1.066015 1.549028 -2.604998  
 H -0.211167 0.346042 -1.663038  
 H 1.304988 2.083854 -2.041648  
 H 1.907581 -0.091495 -3.883228  
 H 2.596303 1.968956 -4.513251

1b-C22,  $\Delta G = 4.4252$  kcal/mol, population = 0.03 %

C 5.386048 3.691797 -1.989791  
 C 5.126656 2.532823 -1.261019  
 C 4.911546 1.329139 -1.920155  
 C 4.942493 1.260998 -3.316462  
 C 5.215154 2.423936 -4.034341  
 C 5.435219 3.632153 -3.377566  
 C 4.665713 -0.045133 -4.019545  
 C 3.228882 -0.560700 -3.792322  
 C 3.066488 -1.993139 -4.290088  
 O 3.980189 -2.801288 -3.756369  
 O 2.194293 -2.347413 -5.052865  
 C 3.901137 -4.222057 -4.078895  
 C 2.922615 -4.929735 -3.165884  
 C -0.127881 0.525736 -2.117173  
 C 0.632643 0.943130 -0.856199  
 C -0.012263 -0.982639 -2.356069



C 0.240486 1.394039 -3.333505  
 C 1.723462 1.452525 -3.734020  
 N 2.210547 0.260563 -4.442397  
 C 1.951737 2.682554 -4.632648  
 O 2.445290 2.385679 -5.834192  
 O 1.697815 3.817512 -4.297018  
 H 5.550673 4.631417 -1.477879  
 H 5.094059 2.567364 -0.179233  
 H 4.713749 0.433159 -1.343006  
 H 5.243706 2.388601 -5.116035  
 H 5.637968 4.526597 -3.953093  
 H 5.352899 -0.808023 -3.652993  
 H 4.831698 0.060424 -5.092678  
 H 3.062883 -0.612609 -2.709086  
 H 3.625958 -4.324127 -5.126859  
 H 4.917915 -4.579182 -3.935333  
 H 2.930810 -5.998296 -3.389057  
 H 3.202632 -4.796176 -2.120194  
 H 1.908465 -4.557733 -3.311450  
 H -1.188201 0.736117 -1.941409  
 H 1.695080 0.696594 -0.925205  
 H 0.550413 2.017612 -0.678038  
 H 0.237464 0.423624 0.018939  
 H -0.500052 -1.281271 -3.286242  
 H -0.485873 -1.530816 -1.539063  
 H 1.026336 -1.311427 -2.397082  
 H -0.339625 1.069450 -4.203858  
 H -0.068056 2.418366 -3.118890  
 H 2.331647 1.627811 -2.847022  
 H 1.446913 -0.333396 -4.743912  
 H 2.575782 1.396439 -5.789752

1b-C27,  $\Delta G = 4.4879$  kcal/mol, population = 0.03 %

C 5.605432 3.892962 -2.602319  
 C 5.659125 2.880992 -1.646129  
 C 5.447668 1.558873 -2.018110  
 C 5.176888 1.224466 -3.348285  
 C 5.142981 2.243259 -4.299094  
 C 5.351676 3.569614 -3.930628  
 C 4.869400 -0.201741 -3.725008  
 C 3.453675 -0.629323 -3.277776  
 C 3.213814 -2.105047 -3.572954  
 O 4.145349 -2.872696 -3.010877  
 O 2.278638 -2.519412 -4.223503

C 4.065522 -4.312642 -3.231197  
 C 4.732735 -4.698333 -4.534332  
 C -0.692756 0.930153 -2.911590  
 C -1.741273 0.695334 -1.820495  
 C -0.791658 -0.158942 -3.984356  
 C 0.693078 1.048475 -2.257728  
 C 1.900446 1.312900 -3.174243  
 N 2.400928 0.152342 -3.927265  
 C 1.650129 2.470378 -4.148636  
 O 2.013322 2.209804 -5.406303  
 O 1.181305 3.536473 -3.820366  
 H 5.764573 4.924012 -2.312988  
 H 5.865147 3.123002 -0.610915  
 H 5.485819 0.777798 -1.267271  
 H 4.942204 1.999199 -5.334617  
 H 5.312650 4.348615 -4.681665  
 H 4.939634 -0.329063 -4.806564  
 H 5.589164 -0.875709 -3.260804  
 H 3.396355 -0.532402 -2.186784  
 H 4.581825 -4.736651 -2.373489  
 H 3.018656 -4.609208 -3.207187  
 H 4.716817 -5.784817 -4.639076  
 H 4.210754 -4.265255 -5.387677  
 H 5.772102 -4.367896 -4.549633  
 H -0.916949 1.889873 -3.386684  
 H -2.747453 0.679400 -2.244178  
 H -1.572967 -0.263601 -1.321620  
 H -1.706251 1.479324 -1.060914  
 H -0.190793 0.067903 -4.867608  
 H -1.823526 -0.257878 -4.327125  
 H -0.479215 -1.131218 -3.593011  
 H 0.651720 1.859218 -1.528091  
 H 0.910655 0.135885 -1.693052  
 H 2.717138 1.666744 -2.543752  
 H 1.646408 -0.480106 -4.167407  
 H 2.395794 1.291982 -5.358022

1b-C26,  $\Delta G = 4.5582$  kcal/mol, population = 0.03 %

C 5.709513 3.684228 -2.294007  
 C 5.619366 3.517883 -3.670892  
 C 5.279437 2.277391 -4.204297  
 C 5.024058 1.188065 -3.373582  
 C 5.132250 1.362822 -1.990308  
 C 5.468194 2.599361 -1.453603

C 4.636334 -0.153617 -3.945789  
 C 3.215366 -0.605098 -3.545281  
 C 2.974368 -2.059497 -3.938312  
 O 3.907336 -2.862711 -3.431091  
 O 2.033132 -2.431313 -4.604696  
 C 3.818430 -4.286597 -3.736320  
 C 4.465102 -4.595981 -5.069762  
 C -0.040452 0.735665 -1.705423  
 C 0.116091 -0.784610 -1.789486  
 C -1.467706 1.092192 -1.277493  
 C 0.290171 1.473641 -3.011404  
 C 1.758676 1.444448 -3.466445  
 N 2.157044 0.203609 -4.145863  
 C 2.002519 2.626640 -4.424499  
 O 2.367921 2.256598 -5.651155  
 O 1.854782 3.786521 -4.111888  
 H 5.968454 4.649012 -1.876522  
 H 5.807194 4.353782 -4.332991  
 H 5.199687 2.159023 -5.277377  
 H 4.951094 0.525280 -1.326401  
 H 5.544403 2.717218 -0.379837  
 H 4.700513 -0.131991 -5.034812  
 H 5.334540 -0.912382 -3.591798  
 H 3.156005 -0.581718 -2.450161  
 H 4.345172 -4.762630 -2.912982  
 H 2.770711 -4.580443 -3.714623  
 H 5.505188 -4.267703 -5.080850  
 H 4.444131 -5.674344 -5.238180  
 H 3.932025 -4.112062 -5.888162  
 H 0.645802 1.108365 -0.936377  
 H -0.237600 -1.252926 -0.868674  
 H -0.470789 -1.193229 -2.616756  
 H 1.151556 -1.090662 -1.925500  
 H -2.191338 0.745162 -2.020842  
 H -1.592326 2.171346 -1.165830  
 H -1.717127 0.621251 -0.324536  
 H -0.337750 1.089829 -3.824190  
 H 0.019230 2.522117 -2.880841  
 H 2.402787 1.622136 -2.603660  
 H 1.359447 -0.388497 -4.345127  
 H 2.444158 1.263625 -5.577131

1b-C25,  $\Delta G = 4.5796$  kcal/mol, population = 0.03 %  
 C 5.654688 3.690066 -2.161754

C 5.556916 3.653710 -3.547631  
C 5.252517 2.459585 -4.196210  
C 5.039497 1.287724 -3.472632  
C 5.155063 1.332610 -2.079831  
C 5.455962 2.522039 -1.428336  
C 4.689598 -0.005027 -4.168239  
C 3.294351 -0.547174 -3.791394  
C 3.096710 -1.969572 -4.305544  
O 4.074463 -2.776142 -3.897883  
O 2.150368 -2.318749 -4.976920  
C 3.980207 -4.189056 -4.249712  
C 3.115310 -4.936746 -3.257369  
C 0.055948 0.494064 -1.771875  
C 0.214332 -1.007563 -2.025753  
C -1.352642 0.787129 -1.245050  
C 0.322815 1.371481 -3.004190  
C 1.775148 1.433875 -3.503497  
N 2.196641 0.272617 -4.299530  
C 1.951116 2.702818 -4.360224  
O 2.304807 2.454319 -5.620552  
O 1.765355 3.824841 -3.946140  
H 5.886136 4.618389 -1.655049  
H 5.711233 4.555101 -4.127349  
H 5.167824 2.442328 -5.275382  
H 5.006209 0.429814 -1.498699  
H 5.538150 2.538385 -0.348705  
H 4.729969 0.126764 -5.250601  
H 5.422233 -0.767715 -3.903046  
H 3.251988 -0.624945 -2.697683  
H 3.595337 -4.267963 -5.264607  
H 5.011241 -4.533092 -4.226120  
H 3.113128 -5.998587 -3.510623  
H 3.504890 -4.827125 -2.244497  
H 2.086695 -4.577080 -3.282395  
H 0.773255 0.788543 -0.997401  
H -0.095156 -1.574702 -1.145493  
H -0.410081 -1.328729 -2.864036  
H 1.242150 -1.292182 -2.242037  
H -1.557606 0.210708 -0.340702  
H -2.107160 0.518571 -1.990181  
H -1.476516 1.845834 -1.008103  
H -0.322966 1.055103 -3.831817  
H 0.031114 2.393391 -2.757992  
H 2.438808 1.558992 -2.646401

H 1.413921 -0.327113 -4.532354  
H 2.418338 1.462141 -5.634545

1b-C37,  $\Delta G = 4.6781$  kcal/mol, population = 0.02 %

C 5.465610 4.219353 -2.654140  
C 5.242559 3.894363 -3.987607  
C 5.182762 2.560057 -4.380743  
C 5.338638 1.533946 -3.450019  
C 5.575853 1.871881 -2.114393  
C 5.637820 3.202240 -1.717576  
C 5.191534 0.090414 -3.853896  
C 3.830831 -0.496216 -3.418272  
C 3.817341 -1.997542 -3.688364  
O 2.747213 -2.391315 -4.385469  
O 4.686589 -2.740404 -3.293306  
C 2.569450 -3.817657 -4.632525  
C 1.853291 -4.474395 -3.471985  
C -0.001617 -0.281332 -2.721667  
C -0.831839 0.240794 -3.896733  
C -0.911522 -0.716174 -1.569768  
C 1.024826 0.736519 -2.205482  
C 2.062277 1.239188 -3.222074  
N 2.704554 0.204378 -4.044000  
C 1.530990 2.342390 -4.146878  
O 0.822815 3.251095 -3.779827  
O 1.968046 2.248798 -5.406382  
H 5.508930 5.256167 -2.345567  
H 5.112304 4.678003 -4.723390  
H 5.006255 2.314272 -5.420511  
H 5.705061 1.085861 -1.379078  
H 5.819795 3.446659 -0.678461  
H 5.274761 -0.007888 -4.937478  
H 5.977985 -0.512622 -3.399313  
H 3.766110 -0.423484 -2.326273  
H 1.979700 -3.853944 -5.545099  
H 3.546906 -4.260259 -4.812799  
H 1.669323 -5.523834 -3.709185  
H 2.453661 -4.429538 -2.563228  
H 0.893129 -3.991247 -3.286643  
H 0.538892 -1.173099 -3.056963  
H -0.221997 0.468537 -4.773367  
H -1.567699 -0.505065 -4.203473  
H -1.366901 1.151902 -3.619605  
H -1.496270 0.130096 -1.198717

H -1.610007 -1.489605 -1.895531  
H -0.330263 -1.115102 -0.735510  
H 0.506598 1.609671 -1.802487  
H 1.567492 0.285062 -1.371136  
H 2.851145 1.744701 -2.661231  
H 2.019512 -0.479848 -4.340578  
H 2.534075 1.432215 -5.406696

1b-C24,  $\Delta G = 4.7170$  kcal/mol, population = 0.02 %

C 5.413484 3.686650 -2.114322  
C 5.121693 2.604588 -1.286423  
C 4.870602 1.354028 -1.836706  
C 4.898646 1.162243 -3.221760  
C 5.206654 2.248352 -4.038843  
C 5.461551 3.503052 -3.491283  
C 4.574333 -0.189432 -3.808177  
C 3.107357 -0.612682 -3.573689  
C 2.893573 -2.070677 -3.966830  
O 3.732967 -2.876622 -3.319377  
O 2.046967 -2.442205 -4.749853  
C 3.666548 -4.304511 -3.610912  
C 4.494061 -4.645712 -4.831867  
C -0.190568 0.760135 -2.046471  
C 0.601760 1.225351 -0.822205  
C -0.169272 -0.765953 -2.171918  
C 0.219232 1.511255 -3.325839  
C 1.703065 1.469358 -3.723220  
N 2.146316 0.199722 -4.315372  
C 1.984855 2.601537 -4.729758  
O 2.485649 2.177211 -5.889138  
O 1.765293 3.770798 -4.506299  
H 5.605085 4.662663 -1.686818  
H 5.090568 2.735981 -0.212023  
H 4.646448 0.518745 -1.183111  
H 5.234295 2.116665 -5.112932  
H 5.690827 4.336692 -4.143035  
H 5.212990 -0.946379 -3.352767  
H 4.770405 -0.194390 -4.881538  
H 2.918353 -0.566358 -2.494544  
H 4.061465 -4.772574 -2.712631  
H 2.622241 -4.584064 -3.736305  
H 4.478192 -5.726108 -4.987216  
H 4.094097 -4.166202 -5.725364  
H 5.530528 -4.334260 -4.696143

H -1.235150 1.046429 -1.884247  
H 1.647629 0.912473 -0.873469  
H 0.584338 2.313348 -0.726348  
H 0.181790 0.798565 0.090668  
H -0.675845 -1.102035 -3.079056  
H -0.676030 -1.220963 -1.318405  
H 0.846287 -1.162499 -2.183833  
H -0.376608 1.148563 -4.170156  
H -0.038660 2.563057 -3.193078  
H 2.316433 1.700166 -2.852923  
H 1.362300 -0.379660 -4.592114  
H 2.580253 1.192479 -5.750239

1b-C40,  $\Delta G = 5.0615$  kcal/mol, population = 0.01 %

C 7.102734 2.485668 -4.155546  
C 6.025118 3.288787 -3.797518  
C 4.964858 2.752180 -3.072899  
C 4.957641 1.407978 -2.698420  
C 6.055728 0.615850 -3.047908  
C 7.116696 1.147146 -3.772582  
C 3.792593 0.827181 -1.937730  
C 2.809839 -0.004486 -2.797022  
C 3.488074 -1.200254 -3.449185  
O 4.045656 -1.995232 -2.536282  
O 3.493538 -1.411112 -4.641779  
C 4.683662 -3.221352 -3.003700  
C 3.666112 -4.329413 -3.173130  
C -0.748166 -0.421822 -3.062702  
C -0.191326 -1.672490 -3.749379  
C -2.268767 -0.545403 -2.922374  
C -0.396725 0.880708 -3.807296  
C 0.948812 1.522618 -3.441625  
N 2.154993 0.786427 -3.837084  
C 1.024840 2.943587 -4.034370  
O 2.165950 3.202957 -4.671270  
O 0.142771 3.765690 -3.929696  
H 7.929153 2.900454 -4.718753  
H 6.009099 4.334514 -4.078402  
H 4.137191 3.389537 -2.788948  
H 6.088686 -0.421074 -2.739374  
H 7.958156 0.516895 -4.032435  
H 4.147013 0.182748 -1.132908  
H 3.219432 1.630476 -1.472616  
H 2.075270 -0.430952 -2.104393

H 5.208683 -3.006295 -3.932559  
H 5.406369 -3.452311 -2.224943  
H 3.132016 -4.510157 -2.239491  
H 2.944424 -4.084757 -3.952316  
H 4.179991 -5.249328 -3.458219  
H -0.326276 -0.361602 -2.053137  
H -0.429679 -2.568160 -3.172316  
H -0.634343 -1.786038 -4.742569  
H 0.888717 -1.642910 -3.877734  
H -2.540538 -1.468433 -2.405725  
H -2.744951 -0.561091 -3.907067  
H -2.684314 0.294074 -2.361305  
H -0.430848 0.710172 -4.888819  
H -1.157825 1.631080 -3.590859  
H 0.975674 1.667446 -2.358108  
H 1.989120 0.207435 -4.652933  
H 2.695897 2.364593 -4.569507

1b-C54,  $\Delta G = 5.0853$  kcal/mol, population = 0.01 %

C 5.576722 3.997044 -2.226353  
C 5.460851 3.919523 -3.609180  
C 5.243808 2.689634 -4.224761  
C 5.139582 1.521463 -3.471624  
C 5.271499 1.609289 -2.082287  
C 5.483381 2.834848 -1.463373  
C 4.904072 0.187566 -4.137278  
C 3.597551 -0.509391 -3.709706  
C 3.650839 -1.980124 -4.121649  
O 2.526028 -2.396386 -4.708003  
O 4.608028 -2.686306 -3.901182  
C 2.410011 -3.810362 -5.047372  
C 1.900717 -4.605016 -3.863987  
C 0.234301 0.316759 -1.692461  
C 0.604648 -1.161869 -1.833166  
C -1.221197 0.451834 -1.234051  
C 0.434007 1.139459 -2.973583  
C 1.881235 1.307294 -3.464533  
N 2.392700 0.150812 -4.216351  
C 1.953304 2.551788 -4.369079  
O 1.691326 3.671821 -3.993349  
O 2.303379 2.281560 -5.626433  
H 5.740257 4.952854 -1.744863  
H 5.532913 4.816166 -4.211918  
H 5.143436 2.639217 -5.301541



H 5.208166 0.711841 -1.477904  
H 5.579587 2.883809 -0.385875  
H 4.895035 0.304966 -5.222120  
H 5.723092 -0.488954 -3.889366  
H 3.584213 -0.545750 -2.612081  
H 1.707213 -3.823750 -5.876704  
H 3.381255 -4.163373 -5.387751  
H 1.768568 -5.647048 -4.160984  
H 2.607927 -4.572925 -3.035119  
H 0.938694 -4.220462 -3.523582  
H 0.874103 0.756652 -0.919040  
H 0.339051 -1.706905 -0.925092  
H 0.066446 -1.623800 -2.665587  
H 1.670443 -1.313024 -1.994951  
H -1.384455 -0.079848 -0.294539  
H -1.495475 1.498169 -1.084039  
H -1.901239 0.029488 -1.979582  
H -0.165660 0.713012 -3.786496  
H 0.040748 2.140726 -2.792731  
H 2.525252 1.519652 -2.609344  
H 1.664954 -0.535006 -4.364225  
H 2.482210 1.299670 -5.609364

1b-C47,  $\Delta G = 5.6513$  kcal/mol, population = 0.00 %

C 5.229903 3.999842 -2.051848  
C 5.260547 3.883100 -3.436499  
C 5.158983 2.629928 -4.035178  
C 5.025410 1.477887 -3.262082  
C 5.013240 1.605379 -1.869520  
C 5.109660 2.853931 -1.268282  
C 4.882060 0.120229 -3.904065  
C 3.515018 -0.545701 -3.643844  
C 3.601134 -2.030529 -3.993546  
O 2.569348 -2.452530 -4.727882  
O 4.501493 -2.740750 -3.608211  
C 2.478744 -3.876414 -5.031969  
C 1.797633 -4.622709 -3.904830  
C 0.067585 0.334162 -2.027679  
C 0.801974 0.881006 -0.801169  
C 0.294283 -1.172846 -2.181616  
C 0.356694 1.157195 -3.296036  
C 1.825783 1.312819 -3.717944  
N 2.408094 0.113012 -4.339530  
C 1.938085 2.482573 -4.713268

O 2.456562 2.137063 -5.891343  
O 1.579664 3.612178 -4.467542  
H 5.301949 4.973722 -1.584460  
H 5.356356 4.766932 -4.054594  
H 5.171104 2.548755 -5.114674  
H 4.925974 0.720427 -1.249708  
H 5.093536 2.933969 -0.188509  
H 5.032631 0.193582 -4.982347  
H 5.645766 -0.551399 -3.510462  
H 3.347767 -0.542765 -2.558994  
H 1.897052 -3.910862 -5.949761  
H 3.481828 -4.252208 -5.222875  
H 1.681137 -5.670834 -4.186441  
H 2.388295 -4.578210 -2.989840  
H 0.808543 -4.207747 -3.708149  
H -1.004385 0.473080 -1.851556  
H 0.637044 1.954348 -0.683813  
H 0.454085 0.383836 0.106425  
H 1.880037 0.714836 -0.866590  
H 1.353511 -1.428887 -2.212250  
H -0.135047 -1.706743 -1.331447  
H -0.174185 -1.559990 -3.088948  
H -0.202255 0.737203 -4.138958  
H -0.031988 2.164139 -3.137028  
H 2.421600 1.609561 -2.855148  
H 1.689618 -0.564253 -4.557404  
H 2.667678 1.167817 -5.773145

1b-C51,  $\Delta G = 5.6865$  kcal/mol, population = 0.00 %

C 5.255150 4.027748 -2.177784  
C 5.315611 3.791086 -3.546108  
C 5.184395 2.495118 -4.038218  
C 4.990191 1.419281 -3.173664  
C 4.947839 1.666510 -1.797935  
C 5.074838 2.958384 -1.302880  
C 4.818485 0.016869 -3.701664  
C 3.430347 -0.590339 -3.417500  
C 3.481617 -2.100729 -3.648279  
O 2.414074 -2.560687 -4.304378  
O 4.380601 -2.796611 -3.234834  
C 2.323104 -3.995970 -4.548892  
C 3.063423 -4.376521 -5.812872  
C 0.000924 0.568217 -1.948809  
C 0.740936 1.205339 -0.770249

C 0.175502 -0.953364 -1.953403  
 C 0.333589 1.253599 -3.286619  
 C 1.812358 1.313482 -3.698987  
 N 2.355230 0.036089 -4.189382  
 C 1.982854 2.372239 -4.804224  
 O 2.501084 1.890181 -5.933601  
 O 1.668012 3.534017 -4.677913  
 H 5.351558 5.035273 -1.793531  
 H 5.458520 4.614653 -4.234372  
 H 5.221280 2.320638 -5.106102  
 H 4.812058 0.841785 -1.107727  
 H 5.035257 3.131524 -0.234706  
 H 5.555632 -0.639006 -3.237357  
 H 4.993063 -0.005324 -4.778639  
 H 3.240131 -0.496286 -2.340104  
 H 2.711228 -4.518132 -3.676627  
 H 1.254692 -4.177582 -4.635391  
 H 2.922201 -5.441803 -6.004883  
 H 2.679404 -3.820363 -6.668945  
 H 4.131924 -4.184932 -5.715655  
 H -1.067279 0.760611 -1.802555  
 H 1.812282 0.993034 -0.801955  
 H 0.616264 2.290462 -0.760717  
 H 0.362916 0.813247 0.175958  
 H -0.300455 -1.410474 -2.823641  
 H -0.277907 -1.386007 -1.059264  
 H 1.225494 -1.246735 -1.949436  
 H -0.231229 0.773508 -4.092873  
 H -0.019426 2.284401 -3.232060  
 H 2.408673 1.673223 -2.861221  
 H 1.613645 -0.632935 -4.347088  
 H 2.671588 0.930203 -5.715385

1b-C55,  $\Delta G = 5.8609$  kcal/mol, population = 0.00 %

C 5.426730 4.200036 -2.752396  
 C 5.138832 3.832813 -4.062143  
 C 5.047977 2.486806 -4.406948  
 C 5.236773 1.490573 -3.450299  
 C 5.540059 1.870827 -2.139514  
 C 5.633083 3.212803 -1.791112  
 C 5.068438 0.034855 -3.799183  
 C 3.753334 -0.559380 -3.254717  
 C 3.761794 -2.073707 -3.454562  
 O 2.587870 -2.544247 -3.886192

O 4.724802 -2.764451 -3.212162  
 C 2.459771 -3.979747 -4.109694  
 C 2.937336 -4.353495 -5.496466  
 C -0.505245 0.585082 -2.631233  
 C -1.440071 0.269956 -1.460097  
 C -0.563411 -0.536425 -3.673671  
 C 0.903986 0.869603 -2.086931  
 C 2.009837 1.212392 -3.100886  
 N 2.566878 0.069417 -3.844640  
 C 1.574678 2.292731 -4.097545  
 O 1.025174 3.321888 -3.776923  
 O 1.871218 2.010294 -5.368171  
 H 5.495221 5.246061 -2.481808  
 H 4.981959 4.592703 -4.817405  
 H 4.818908 2.209290 -5.428193  
 H 5.698080 1.108863 -1.384725  
 H 5.866550 3.489459 -0.770510  
 H 5.078533 -0.095756 -4.882525  
 H 5.891457 -0.547642 -3.384998  
 H 3.748678 -0.435262 -2.163501  
 H 3.016979 -4.499896 -3.333141  
 H 1.396679 -4.169112 -3.983340  
 H 4.002489 -4.153607 -5.612836  
 H 2.769095 -5.419675 -5.659535  
 H 2.386931 -3.799327 -6.257772  
 H -0.866276 1.501843 -3.106927  
 H -2.466477 0.135010 -1.807335  
 H -1.132826 -0.651216 -0.956658  
 H -1.435651 1.074099 -0.721135  
 H -0.123740 -1.460993 -3.288640  
 H -0.053251 -0.270045 -4.601740  
 H -1.600644 -0.750844 -3.938409  
 H 0.831057 1.702522 -1.385417  
 H 1.254252 0.008622 -1.508145  
 H 2.828040 1.673021 -2.546116  
 H 1.858374 -0.639565 -3.975808  
 H 2.342783 1.135115 -5.314075

1b-C38,  $\Delta G = 5.9494$  kcal/mol, population = 0.00 %

C 7.165993 2.242911 -4.454221  
 C 7.132262 0.923888 -4.009687  
 C 6.098335 0.489036 -3.188398  
 C 5.074105 1.359031 -2.801400  
 C 5.131217 2.683666 -3.237140

C 6.165129 3.123848 -4.058950  
 C 3.934674 0.874644 -1.941013  
 C 2.842328 0.081542 -2.703567  
 C 3.418486 -1.148732 -3.391229  
 O 3.946648 -1.992906 -2.505489  
 O 3.388125 -1.334109 -4.587283  
 C 4.500614 -3.245121 -3.009801  
 C 3.414709 -4.286850 -3.176153  
 C -0.977796 -0.397152 -3.597464  
 C -1.508640 -0.330328 -2.163340  
 C -0.055489 -1.603887 -3.784343  
 C -0.377932 0.943893 -4.054844  
 C 0.845445 1.472598 -3.282937  
 N 2.124969 0.881057 -3.693779  
 C 0.920897 3.000570 -3.456132  
 O 2.050957 3.423597 -4.020682  
 O 0.039712 3.759525 -3.120633  
 H 7.971140 2.582665 -5.093400  
 H 7.915791 0.233903 -4.297340  
 H 6.095211 -0.533753 -2.833719  
 H 4.367988 3.383135 -2.921116  
 H 6.188748 4.155976 -4.385949  
 H 3.441878 1.721079 -1.460599  
 H 4.310350 0.229402 -1.146062  
 H 2.150941 -0.296492 -1.943417  
 H 5.016794 -3.043340 -3.946561  
 H 5.225096 -3.533892 -2.252318  
 H 3.865710 -5.229768 -3.490933  
 H 2.892159 -4.454382 -2.233568  
 H 2.691331 -3.983220 -3.932682  
 H -1.840075 -0.549669 -4.255385  
 H -0.697884 -0.225723 -1.437609  
 H -2.188643 0.513841 -2.030069  
 H -2.050052 -1.244552 -1.912074  
 H 0.397458 -1.620600 -4.777174  
 H -0.617517 -2.531084 -3.655751  
 H 0.746137 -1.617511 -3.044696  
 H -0.108323 0.883671 -5.114328  
 H -1.161017 1.699457 -3.977022  
 H 0.697244 1.313810 -2.212505  
 H 2.037478 0.352544 -4.554018  
 H 2.582713 2.588504 -4.142924

1b-C35,  $\Delta G = 6.0222$  kcal/mol, population = 0.00 %

C 6.926292 2.471813 -3.550789  
C 7.002092 1.086498 -3.435308  
C 5.927629 0.368023 -2.922270  
C 4.757004 1.016780 -2.522540  
C 4.699136 2.407088 -2.629620  
C 5.771952 3.131200 -3.140653  
C 3.574624 0.237233 -2.007637  
C 2.719859 -0.412794 -3.118872  
C 3.448453 -1.519848 -3.870358  
O 3.947407 -2.431118 -3.034296  
O 3.512393 -1.587534 -5.077921  
C 4.585291 -3.609159 -3.613612  
C 6.043980 -3.355181 -3.928796  
C -1.272801 0.461567 -2.763860  
C -1.739463 1.841841 -2.296821  
C -0.697075 -0.347745 -1.598975  
C -0.306832 0.530941 -3.960935  
C 1.018083 1.288525 -3.717534  
N 2.240153 0.566467 -4.088710  
C 1.059860 2.659388 -4.411245  
O 0.102340 3.383273 -4.549687  
O 2.279221 3.013731 -4.828191  
H 7.762410 3.032510 -3.949192  
H 7.900571 0.564321 -3.740115  
H 6.003660 -0.705906 -2.821445  
H 3.807983 2.930701 -2.305885  
H 5.705325 4.209344 -3.216802  
H 3.896111 -0.552118 -1.328633  
H 2.924079 0.899717 -1.434628  
H 1.885494 -0.924073 -2.621942  
H 4.468290 -4.370507 -2.846255  
H 4.026429 -3.900682 -4.500856  
H 6.490133 -4.274485 -4.312874  
H 6.156825 -2.579376 -4.685725  
H 6.592647 -3.062033 -3.032859  
H -2.153472 -0.077472 -3.128460  
H -0.909759 2.431137 -1.898176  
H -2.179655 2.409901 -3.116744  
H -2.483685 1.743952 -1.503412  
H 0.171303 0.144127 -1.151866  
H -1.439907 -0.462731 -0.807096  
H -0.392670 -1.346839 -1.919396  
H -0.053895 -0.490461 -4.255230  
H -0.825988 0.983795 -4.806922

H 1.103226 1.532629 -2.655016  
H 2.126389 0.106990 -4.987397  
H 2.852775 2.228030 -4.625728

1b-C39,  $\Delta G = 6.2437$  kcal/mol, population = 0.00 %

C 5.523375 4.000898 -2.573435  
C 5.266613 3.739861 -3.914964  
C 5.095833 2.428969 -4.350896  
C 5.170652 1.363335 -3.455070  
C 5.444487 1.635436 -2.111449  
C 5.618492 2.942458 -1.672336  
C 4.897265 -0.046690 -3.907276  
C 3.486587 -0.531259 -3.492293  
C 3.286911 -1.971131 -3.941623  
O 4.138356 -2.791484 -3.328242  
O 2.462124 -2.318469 -4.758676  
C 4.057337 -4.213616 -3.645321  
C 2.988595 -4.894110 -2.816524  
C -0.428660 0.255135 -2.584239  
C -0.242258 -1.257124 -2.767165  
C -1.116639 0.876650 -3.801892  
C 0.854267 0.994626 -2.147111  
C 1.911026 1.369150 -3.198556  
N 2.425164 0.298921 -4.062817  
C 1.503621 2.559406 -4.079327  
O 1.890666 2.447478 -5.353161  
O 0.932345 3.542493 -3.667326  
H 5.653362 5.019853 -2.231576  
H 5.196112 4.555595 -4.623472  
H 4.893241 2.233020 -5.396330  
H 5.512370 0.817499 -1.403238  
H 5.826933 3.136432 -0.627591  
H 5.628986 -0.730270 -3.475794  
H 4.973891 -0.112625 -4.993880  
H 3.434585 -0.539221 -2.398462  
H 3.872787 -4.320232 -4.712612  
H 5.049947 -4.590031 -3.410686  
H 2.996823 -5.965017 -3.028249  
H 3.177384 -4.754526 -1.751325  
H 1.998572 -4.505721 -3.054942  
H -1.111175 0.375631 -1.736749  
H 0.273231 -1.514450 -3.693180  
H 0.326474 -1.688995 -1.940594  
H -1.214969 -1.752814 -2.799177

H -1.320871 1.936966 -3.650412  
H -2.064831 0.371905 -3.997699  
H -0.511482 0.778837 -4.707784  
H 0.570188 1.932064 -1.665313  
H 1.350188 0.396052 -1.378764  
H 2.765851 1.763975 -2.644757  
H 1.680325 -0.304025 -4.390873  
H 2.355324 1.569742 -5.388362

1b-C42,  $\Delta G = 7.0112$  kcal/mol, population = 0.00 %

C 6.767721 2.296834 -4.472633  
C 5.750048 3.082614 -3.940813  
C 4.830455 2.527872 -3.056154  
C 4.907043 1.183068 -2.691111  
C 5.944079 0.409446 -3.217340  
C 6.865274 0.958340 -4.102809  
C 3.876654 0.575300 -1.775682  
C 2.751972 -0.182766 -2.519530  
C 3.257621 -1.424851 -3.242449  
O 3.909923 -2.240927 -2.414417  
O 3.045662 -1.659008 -4.411786  
C 4.369258 -3.520859 -2.945460  
C 5.720375 -3.394828 -3.616370  
C -1.061332 0.100665 -3.635815  
C -1.102522 0.719228 -5.035559  
C -0.567905 -1.352081 -3.683108  
C -0.329539 0.971539 -2.592635  
C 1.044447 1.564165 -2.949657  
N 2.062209 0.661360 -3.489226  
C 0.955865 2.796018 -3.866446  
O 1.977781 2.908949 -4.719968  
O 0.084244 3.630816 -3.799481  
H 7.483686 2.725628 -5.162385  
H 5.670543 4.127437 -4.213979  
H 4.046832 3.149958 -2.641373  
H 6.036752 -0.627620 -2.924954  
H 7.661614 0.341491 -4.500508  
H 4.340430 -0.122017 -1.078509  
H 3.409863 1.356591 -1.174396  
H 2.062448 -0.562177 -1.753780  
H 4.415482 -4.162712 -2.069121  
H 3.612964 -3.898211 -3.631071  
H 6.469327 -3.015026 -2.920311  
H 6.042552 -4.381512 -3.954515



H 5.672269 -2.736095 -4.483049  
H -2.094989 0.056502 -3.277975  
H -0.107679 0.787492 -5.485121  
H -1.709669 0.104402 -5.702827  
H -1.528005 1.723023 -5.017167  
H -0.495715 -1.776747 -2.679430  
H 0.407572 -1.456548 -4.160376  
H -1.266468 -1.965892 -4.255937  
H -0.964523 1.820782 -2.334652  
H -0.216672 0.387271 -1.676203  
H 1.448491 1.984093 -2.023099  
H 1.684765 0.076761 -4.224939  
H 2.542885 2.111311 -4.545980
